# Supplementary material for: La unidad económica de Europa
Source: Royal Society of Chemistry journal article supplement (doi:10.1039/d3cc01661g), 1950-01-01

(a) Examples of synthesis of quinolinedione

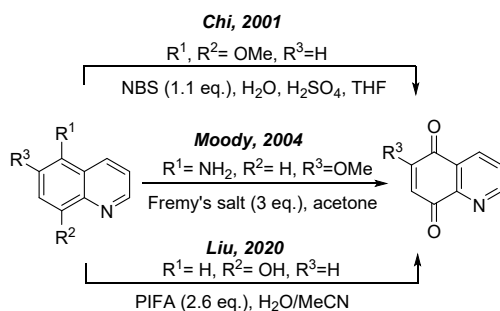

(b) Examples of electrochemical conversion for C(sp<sup>2</sup>)-X bond

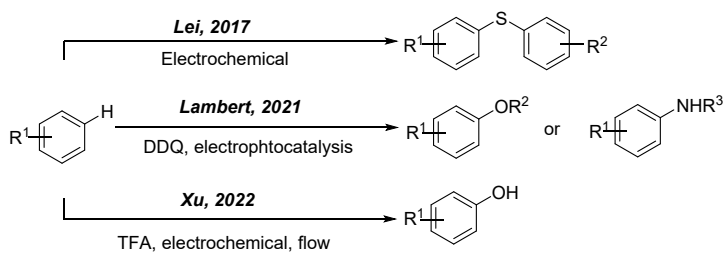

(c) This work

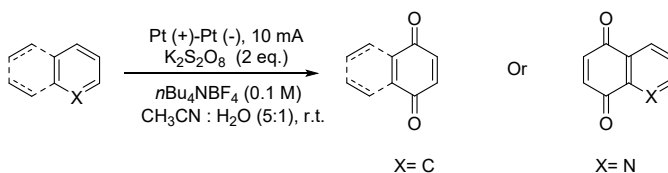

- Direct electrochemical oxidation of C-H bonds
- Oxidation of aromatic and heteroaromatic rings

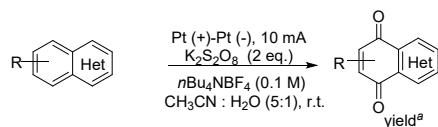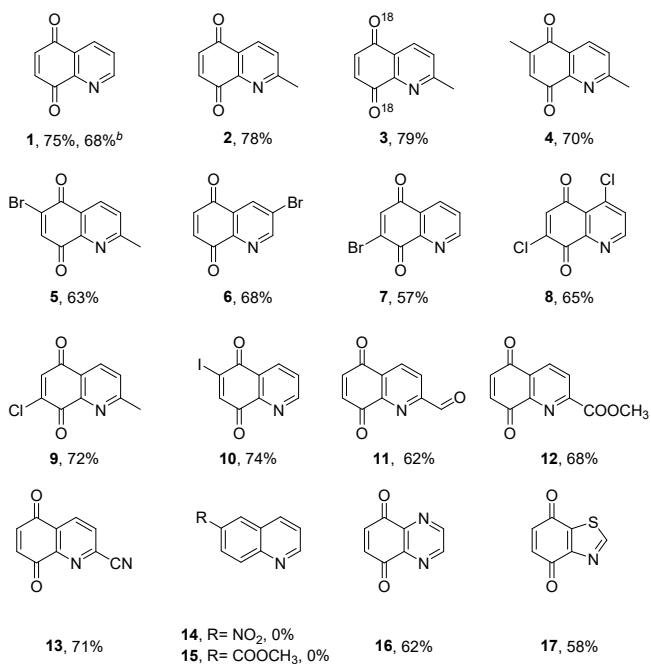

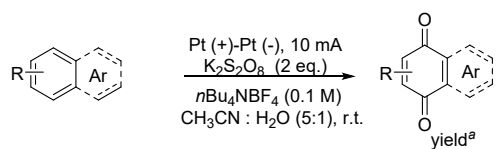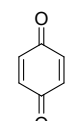

**18**, 56%

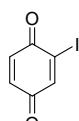

**19**, 56%

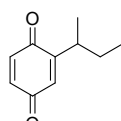

**20**, 58%

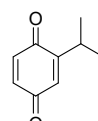

**21**, 30%

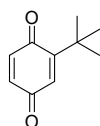

**22**, 38%

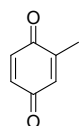

**23**, 63%<sup>b</sup>

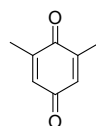

**24**, 36%<sup>c</sup>

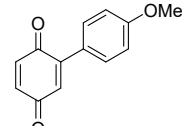

**25**, 53%<sup>g</sup>

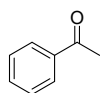

**26**, 0

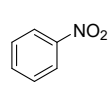

**27**, 0

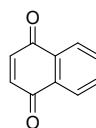

**28**, 40%<sup>d</sup>, 57%<sup>e</sup>, 37%<sup>f</sup>

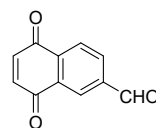

**29**, 62%

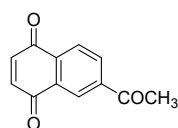

**30**, 67%

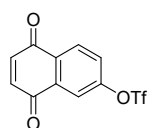

**31**, 54%

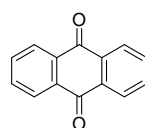

**32**, 68%

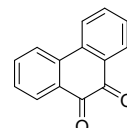

**33**, 56%

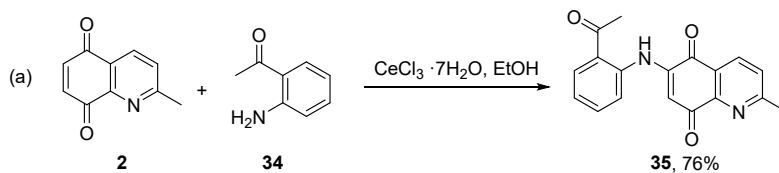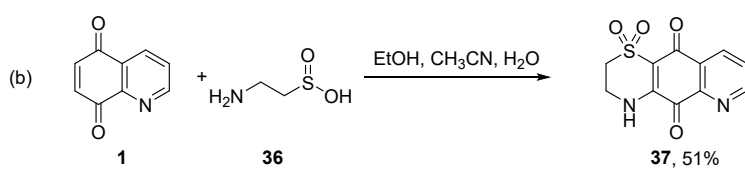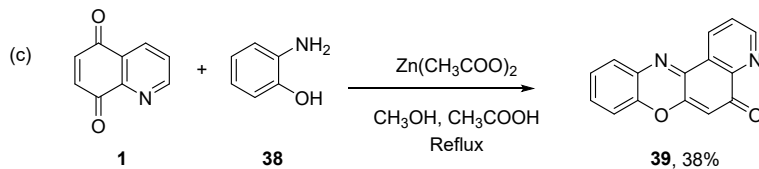

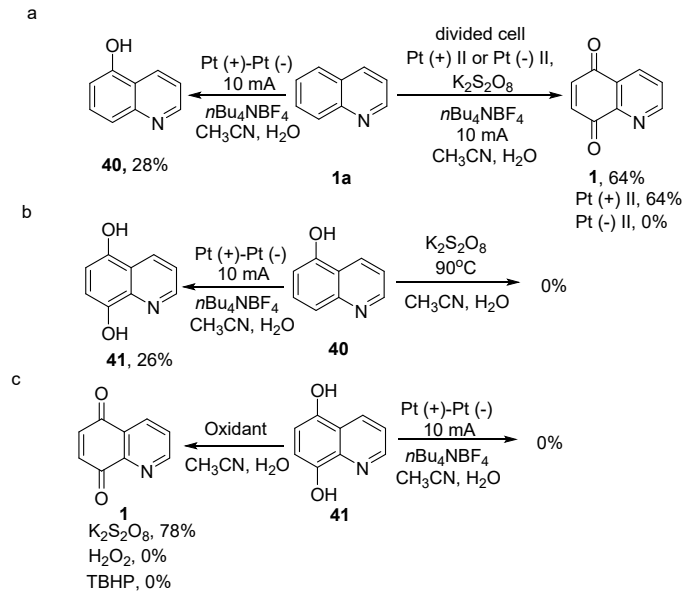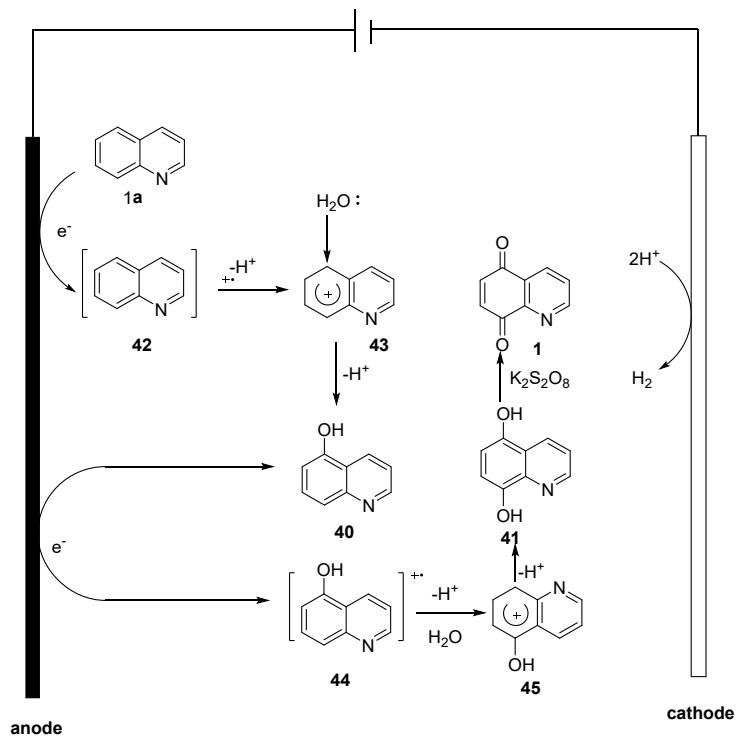

Supplement: d3cc01661g1.pdf [file d3cc01661g1.pdf]
