# Supplementary material for: La unidad económica de Europa
Source: Royal Society of Chemistry journal article supplement (doi:10.1039/d3cc01661g), 1950-01-01
Supplement: d3cc01661g2.pdf [file d3cc01661g2.pdf]

# Supporting Information

## Direct Electrochemical Synthesis of Quinones from Simple

### Aromatics and Heteroaromatics

Ling Zhang,<sup>a</sup> Youtian Fu,<sup>a</sup> Lei Yang<sup>a</sup>, Liming Cao<sup>a</sup>, Junjun Yi<sup>a</sup>, Maolin Sun<sup>b</sup> Ruihua Cheng,<sup>b</sup> Yueyue Ma,<sup>\*b</sup> and Jinxing Ye<sup>\*ab</sup>

<sup>a</sup> Engineering Research Centre of Pharmaceutical Process Chemistry, Ministry of Education; Shanghai Key Laboratory of New Drug Design  
E-mail: yejx@ecust.edu.cn

<sup>b</sup> School of Biomedical and Pharmaceutical Sciences, Guangdong University of Technology, Guangzhou 510006,  
China.

E-mail: mayueyue20121@gdut.edu.cn; jinxingye@gdut.edu.cn

|                                                                     |           |
|---------------------------------------------------------------------|-----------|
| <b>A: General Remarks .....</b>                                     | <b>3</b>  |
| <b>B: Optimization Tables.....</b>                                  | <b>4</b>  |
| <b>C: General Procedure for the Electrolysis.....</b>               | <b>4</b>  |
| <b>D. Mechanism research experiments.....</b>                       | <b>7</b>  |
| <b>E: Characterization Data for the Electrolysis Products .....</b> | <b>9</b>  |
| <b>F: NMR Spectra of Products.....</b>                              | <b>19</b> |
| <b>G: References.....</b>                                           | <b>54</b> |

## **A: General Remarks**

### **A1. Solvents.**

The acetonitrile used in the experiment is chromatographic grade. Other solvents were from commercial sources and used without purification unless otherwise noted.

### **A2. Analytical methods.**

<sup>1</sup>H NMR spectra, <sup>13</sup>C NMR spectra and <sup>19</sup>F NMR spectra were recorded on a Bruker AV-400/600 spectrometer (400/500 MHz and 100/125 MHz). Chemical shifts ( $\delta$ ) for protons are reported in parts per million (ppm) downfield from tetramethylsilane and are referenced to residual solvent peak. Chemical shifts ( $\delta$ ) for carbon are reported in parts per million (ppm) downfield from tetramethylsilane and are referenced to the carbon resonances of the solvent. <sup>19</sup>F spectra were calibrated in relation to the reference measurement of CF<sub>3</sub>COOH (-78.5 ppm). Data are reported as follows: chemical shift, multiplicity (br = broad, s = singlet, d = doublet, dd = doublet of doublets, t = triplet, dt = doublet of triplets, q = quartet, quint = quintet, m = multiplet), coupling constants (J) in Hertz (Hz), integration; “app” is used to denote the apparent splitting of a signal.

High resolution mass spectrometry (HRMS) was carried out using MicroMass GCT CA 055 instrument, recorded on a MicroMass LCTTM spectrometer and analyzed by orthogonal acceleration time-of-flight (OA- TOF).

## B: Optimization Tables

Other factors were screened in Table S1., such as temperature, electrolyte and electric current.

**Table S1.** Additional optimization for the reaction.

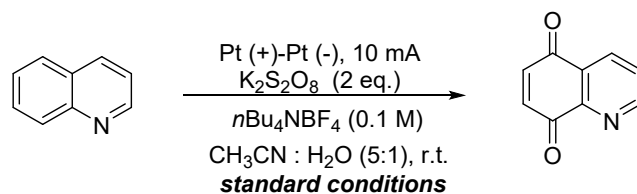

| Entry | Variation from the standard conditions                  | Yield <sup>[a]</sup> (%) |
|-------|---------------------------------------------------------|--------------------------|
| 1     | None                                                    | 75                       |
| 2     | LiClO <sub>4</sub> as electrolyte                       | 71                       |
| 3     | LiPF <sub>4</sub> as electrolyte                        | 69                       |
| 4     | 0.08 M nBu <sub>4</sub> NBF <sub>4</sub> as electrolyte | 72                       |
| 5     | 0.06 M nBu <sub>4</sub> NBF <sub>4</sub> as electrolyte | 71                       |
| 6     | 0.04 M nBu <sub>4</sub> NBF <sub>4</sub> as electrolyte | 68                       |
| 7     | 40°C                                                    | 61                       |
| 8     | 10°C                                                    | 67                       |
| 9     | 8 mA                                                    | 63                       |
| 10    | 12 mA                                                   | 71                       |
| 11    | N <sub>2</sub> atmosphere                               | 70                       |

Standard conditions: quinoline (65 mg, 0.5 mmol), K<sub>2</sub>S<sub>2</sub>O<sub>8</sub> (270 mg, 2 eq.), nBu<sub>4</sub>NBF<sub>4</sub> (0.1 M), CH<sub>3</sub>CN (2.5 mL), H<sub>2</sub>O (0.5 mL), Pt anode, Pt cathode, constant current = 10 mA, under r.t. for 10 h; <sup>[a]</sup>Isolated yield.

## C: General Procedure for the Electrolysis

### C1: General procedure for the making of electrolytic cell

The cathode and anode are assembled by commercially available PTFE screws, nuts and Pt sheets.

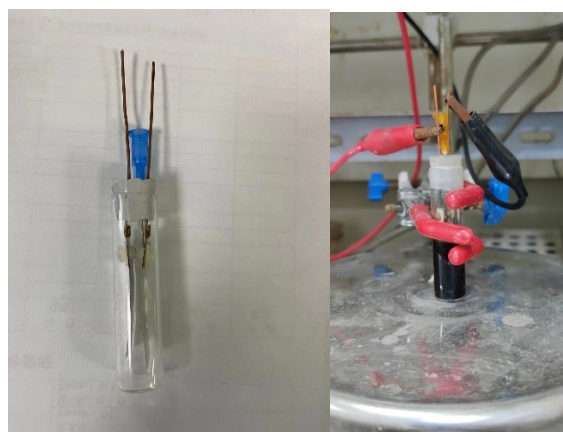

**Figure S1.** General procedure for the electrolysis: the materials used to make the electrolytic cell, the assemble of electrolytic cell and the electrolysis.

Two Pt electrodes (10 mm×35 mm×1 mm) with the copper wires were cross the silica gel plug. Then electrodes were placed into the cube (diameter 13 mm, length 70 mm) and the distance between two Pt sheets was almost 5 mm (Supplementary Figure S1).

### C2: General procedure for electrolysis

An oven-dried undivided cell was equipped with a stir bar, substrate (0.5 mmol, 1 eq.),  $K_2S_2O_8$  (270 mg, 1 mmol, 2 eq.),  $nBu_4NBF_4$  (98 mg, 0.3 mmol, 0.1 M),  $CH_3CN$  (2.5 mL),  $H_2O$  (0.5 mL). Air has little effect on this reaction. Then the assembled electrodes were placed into the solution. The silica gel plug was sealed with film. The mixture was electrolyzed at a constant current of 10 mA until the substrates was completely consumed (Figure S1). The Pt electrodes were washed by water, ethanol and DCM in turn. Adding water dropwise to the reaction solution until all solids are dissolved. The aqueous layer was separated and extracted with EtOAc (3×10 mL), and the combined organic layers were washed with brine and dried over anhydrous  $Na_2SO_4$ . Following concentration in vacuo, the crude product was purified by column chromatography on silica gel to give pure product.

### C3: Large scale general procedure for electrolysis

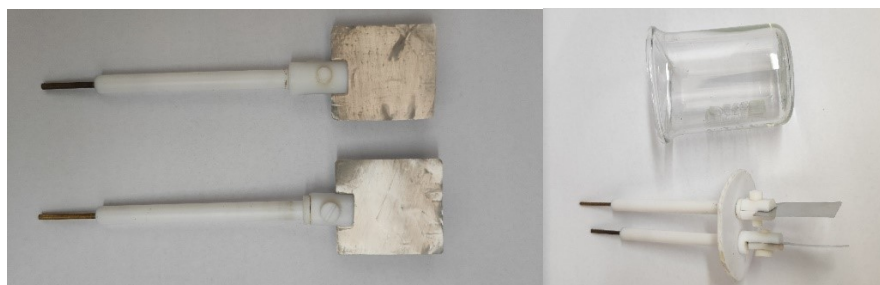

(a)

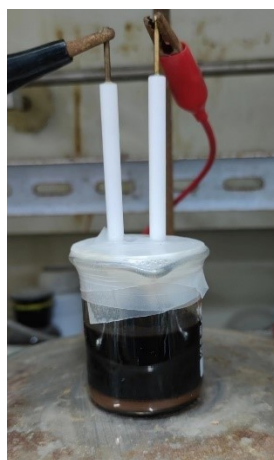

(b)

**Figure S2.** (a) The setup for large scale electrolysis; (b) The electrolysis



to the quinone (109 mg, 0.69 mmol, 1.5 eq.) in 20 mL acetonitrile/ethanol (1:1) solution. The reaction mixture was stirred at room temperature for 18 h then the solvents were removed in vacuo to give an orange solid. Methanol was added, the mixture was sonicated for 1 min then the orange solid was isolated by filtration, then washed with methanol, providing bright yellow solid **37** (62 mg, 51%).

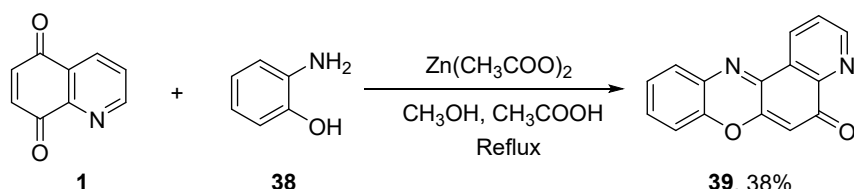

2-Aminophenols (109 mg, 1 mmol) in methanol/acetic acid (50:50 v/v, 10 mL) were added dropwise to an equimolar mixture of 5,8-quinolinquinone (159 mg, 1 mmol) and Zn (II) acetate (183 mg, 1 mmol) in acetic acid (20 mL), and the mixture was stirred and refluxed for 2. The reaction mixture was evaporated in vacuo and acidified (6 N HCl) to break the Zn complex and extracted by chloroform. The organic layers were dried over Na<sub>2</sub>SO<sub>4</sub> and concentrated to dryness. The crude product was purified by flash chromatography to give compound **39** as yellow solid (94 mg, 38%).

## D. Mechanism research experiments

### D1: Divided cell experiment

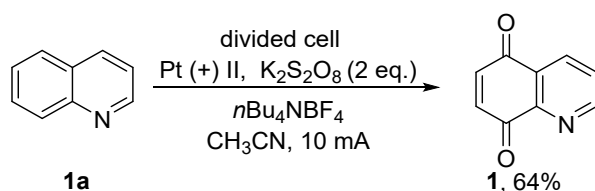

This control experiment was carried out in an H-type divided cell. The anodic chamber was equipped with quinoline (65 mg, 0.5 mmol, 1 eq.), K<sub>2</sub>S<sub>2</sub>O<sub>8</sub> (270 mg, 1 mmol, 2 eq.), *n*Bu<sub>4</sub>NBF<sub>4</sub> (98 mg, 0.3 mmol, 0.1 M) and CH<sub>3</sub>CN (2.5 mL), H<sub>2</sub>O (0.5 mL). The cathodic chamber was added *n*Bu<sub>4</sub>NBF<sub>4</sub> (98 mg, 0.3 mmol, 0.1 M) and CH<sub>3</sub>CN (2.5 mL), H<sub>2</sub>O (0.5 mL). The mixture was electrolyzed at a constant current of 10 mA for 10 h. Water was dropped to the reaction solution until all solids were dissolved and extracted with EtOAc (3×10 mL), and the combined organic layers were washed with brine and dried over anhydrous Na<sub>2</sub>SO<sub>4</sub>. Following concentration in vacuo, the crude product was purified by column chromatography on silica gel to give pure product **1** (51 mg, 64%).

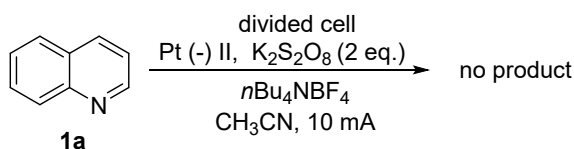

This control experiment was carried out in an H-type divided cell. The cathodic chamber was equipped with quinoline (65 mg, 0.5 mmol, 1 eq.),  $\text{K}_2\text{S}_2\text{O}_8$  (270 mg, 1 mmol, 2 eq),  $n\text{Bu}_4\text{NBF}_4$  (98 mg, 0.3 mmol, 0.1 M) and  $\text{CH}_3\text{CN}$  (2.5 mL),  $\text{H}_2\text{O}$  (0.5 mL). The anodic chamber was added  $n\text{Bu}_4\text{NBF}_4$  (98 mg, 0.3 mmol, 0.1 M) and  $\text{CH}_3\text{CN}$  (2.5 mL),  $\text{H}_2\text{O}$  (0.5 mL). The mixture was electrolyzed at a constant current of 10 mA for 10 h. No product was detected using TLC, and large amount of quinoline was left.

### D2: The determination of the intermediate

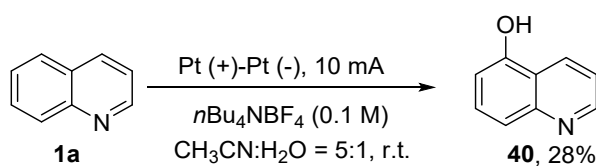

An oven-dried undivided cell was equipped with a stir bar, quinoline **1** (65 mg, 0.5 mmol, 1 eq.),  $n\text{Bu}_4\text{NBF}_4$  (98 mg, 0.3 mmol, 0.1 M),  $\text{CH}_3\text{CN}$  (2.5 mL),  $\text{H}_2\text{O}$  (0.5 mL). Then the assembled electrodes were placed into the solution. The silica gel plug was sealed with film. The mixture was electrolyzed at a constant current of 10 mA for 10 h. The Pt electrodes were washed by water, ethanol and DCM in turn. Water was dropped to the reaction solution until all solids were dissolved and extracted with EtOAc ( $3 \times 10$  mL) The aqueous layer was separated and extracted with EtOAc ( $3 \times 10$  mL), and the combined organic layers were washed with brine and dried over anhydrous  $\text{Na}_2\text{SO}_4$ . Following concentration in vacuo, the crude product was purified by column chromatography on silica gel to give pure product (20.3 mg, 28%).

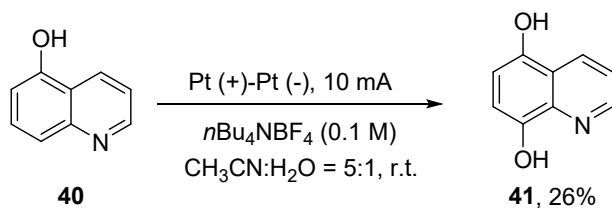

An oven-dried undivided cell was equipped with a stir bar, 5-hydroxyquinoline (72.5 mg, 0.5 mmol, 1 eq.),  $n\text{Bu}_4\text{NBF}_4$  (98 mg, 0.3 mmol, 0.1 M),  $\text{CH}_3\text{CN}$  (2.5 mL),  $\text{H}_2\text{O}$  (0.5 mL). Then the assembled electrodes were placed into the solution. The silica gel plug was sealed with film. The mixture was electrolyzed at a constant current of 10 mA for 10 h (Figure S1). The Pt electrodes were washed by water, ethanol and DCM in turn. Water was dropped to the reaction solution until all solids were dissolved and extracted with EtOAc ( $3 \times 10$  mL), and the combined organic layers were washed with



brine and dried over anhydrous  $\text{Na}_2\text{SO}_4$ . Following concentration in vacuo, the crude product was purified by column chromatography on silica gel to give pure product (21 mg, 26%).

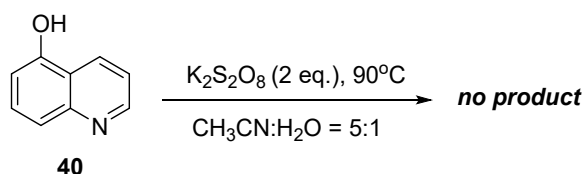

A mixture of 5-hydroxyquinoline (65 mg, 0.5 mmol, 1 eq.) and  $\text{K}_2\text{S}_2\text{O}_8$  (270 mg, 1 mmol, 2 eq.) in acetonitrile (2.5 mL),  $\text{H}_2\text{O}$  (0.5 mL) was heated at 90 °C for 10 h. No product was detected using TLC, and large amount of 5-hydroxyquinoline was left.

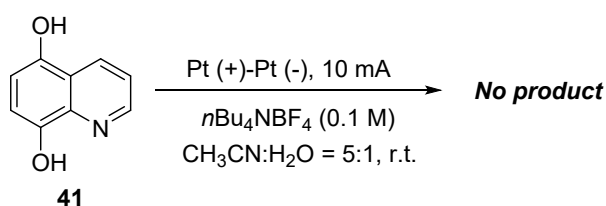

An oven-dried undivided cell was equipped with a stir bar, 5,8-dihydroxyquinoline (0.5 mmol, 80.5 mg, 1 eq.),  $n\text{Bu}_4\text{NBF}_4$  (98 mg, 0.3 mmol, 0.1 M),  $\text{CH}_3\text{CN}$  (2.5 mL),  $\text{H}_2\text{O}$  (0.5 mL). Then the assembled electrodes were placed into the solution. The silica gel plug was sealed with film. The mixture was electrolyzed at a constant current of 10 mA for 10 h (Figure S1). No 5,8-quinolinequinone was detected using TLC, and large amount of 5,8-dihydroxyquinoline was left.

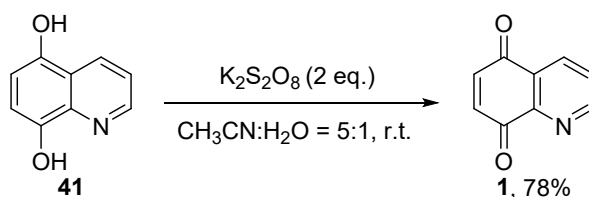

A mixture of 5,8-dihydroxyquinoline (80.5 mg, 0.5 mmol, 1 eq.) and  $\text{K}_2\text{S}_2\text{O}_8$  (270 mg, 1 mmol, 2 eq.) in acetonitrile (2.5 mL) and  $\text{H}_2\text{O}$  (0.5 mL) were stirred at room temperature for 10 h. After the reaction was finished, Water was dropped to the reaction solution until all solids were dissolved and extracted with EtOAc ( $3 \times 100$  mL), and the combined organic layers were washed with brine and dried over anhydrous  $\text{Na}_2\text{SO}_4$ . Following concentration in vacuo, the crude product was purified by column chromatography on silica gel to give pure product (62 mg, 78%).

### D3: Cyclic voltammetry experiments for some substrates

The cyclic voltammograms were recorded in an electrolyte of  $n\text{Bu}_4\text{NBF}_4$  (0.1 M) in

CH<sub>3</sub>CN (3 mL) using a platinum disk working electrode, a Pt wire auxiliary and the Ag/AgCl reference electrode. The scan rate is 100 mV/s.

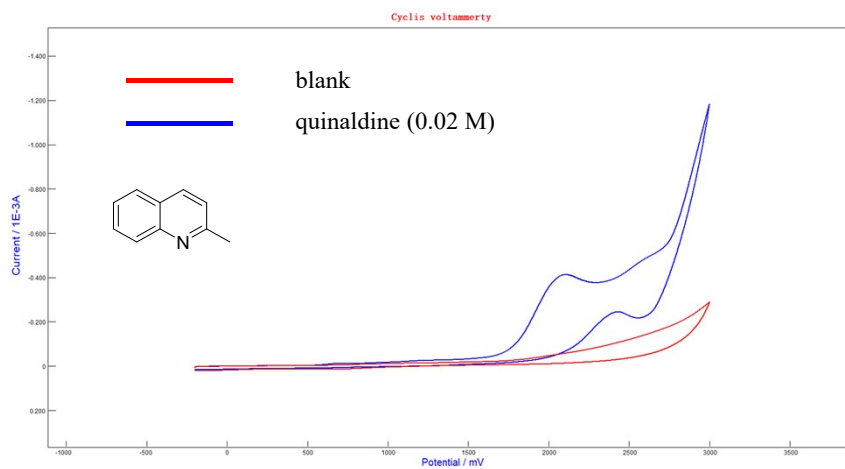

**Figure S3** Red line: cyclic voltammogram of none in an electrolyte of *n*Bu<sub>4</sub>NBF<sub>4</sub> in CH<sub>3</sub>CN; Blue line: cyclic voltammogram of quinaldine (0.02 M) in an electrolyte of *n*Bu<sub>4</sub>NBF<sub>4</sub> in CH<sub>3</sub>CN,  $E_{ox} = 2.08$  V.

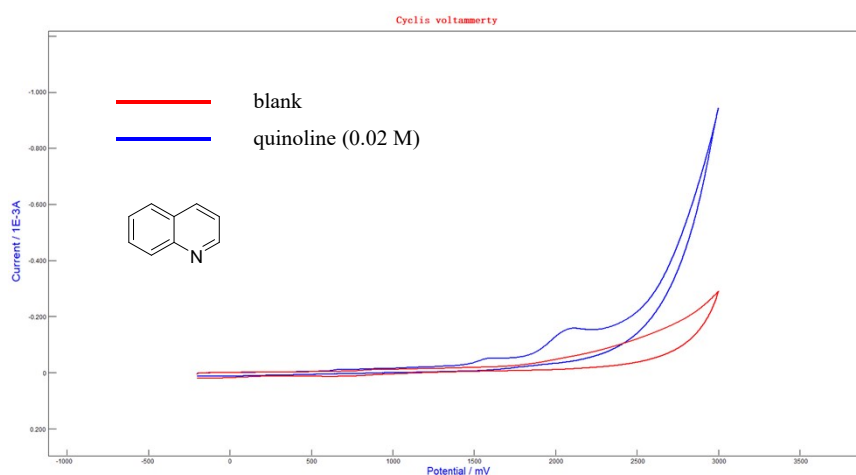

**Figure S4** Red line: cyclic voltammogram of none in an electrolyte of *n*Bu<sub>4</sub>NBF<sub>4</sub> in CH<sub>3</sub>CN; Blue line: cyclic voltammogram of quinoline (0.02 M) in an electrolyte of *n*Bu<sub>4</sub>NBF<sub>4</sub> in CH<sub>3</sub>CN,  $E_{ox} = 2.09$  V

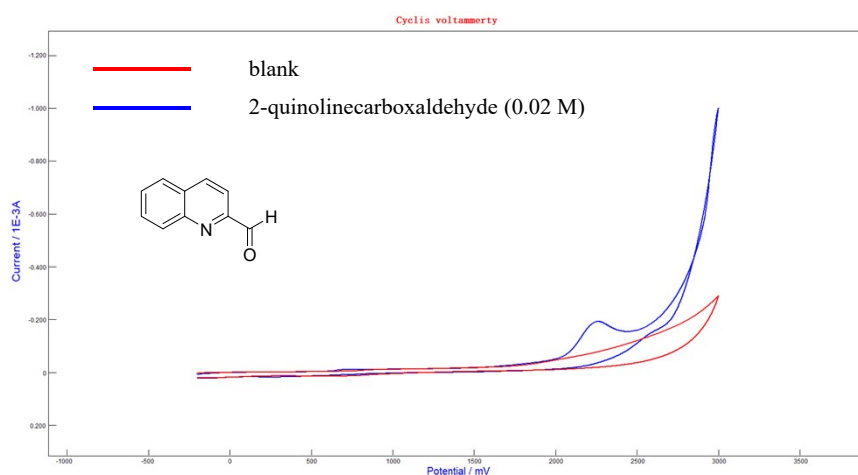

**Figure S5** Red line: cyclic voltammogram of none in an electrolyte of  $n\text{Bu}_4\text{NBF}_4$  in  $\text{CH}_3\text{CN}$ ; Blue line: cyclic voltammogram of 2-quinolinecarboxaldehyde (0.02 M) in an electrolyte of  $n\text{Bu}_4\text{NBF}_4$  in  $\text{CH}_3\text{CN}$ ,  $E_{\text{ox}} = 2.27$  V.

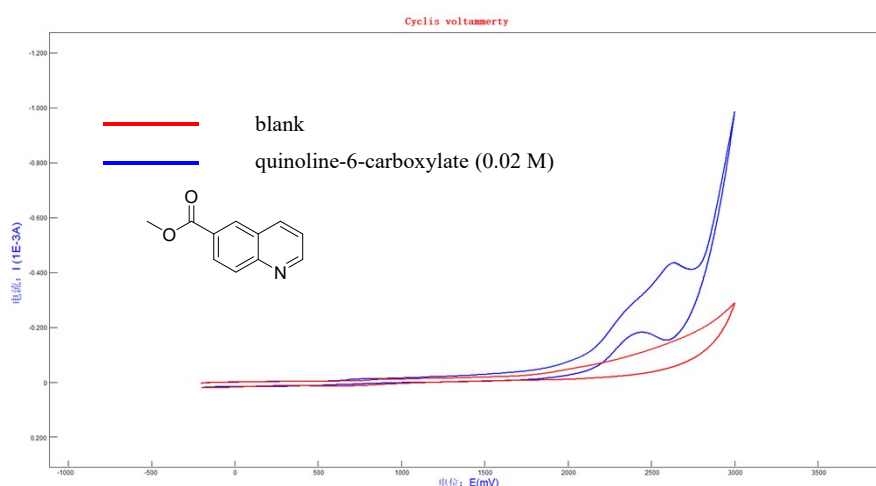

**Figure S6** Red line: cyclic voltammogram of none in an electrolyte of  $n\text{Bu}_4\text{NBF}_4$  in  $\text{CH}_3\text{CN}$ ; Blue line: cyclic voltammogram of methyl quinoline-6-carboxylate (0.02 M) in an electrolyte of  $n\text{Bu}_4\text{NBF}_4$  in  $\text{CH}_3\text{CN}$ ,  $E_{\text{ox}} = 2.63$  V.

#### **D4: Cyclic voltammetry of quinolines under the conditions of different water content**

In Figure S8, the first oxidative peak (1.73 V vs Ag/AgCl) of quinoline was not affected, but the second (2.16 V vs Ag/AgCl) increased with the increasing of water content. The oxidative peak of 2-formylquinoline (2.30 V vs Ag/AgCl) was not affected obviously until the amount of water increased to 4 equivalent. Therefore, the oxidations of water and arenes, especially the electron-deficient ones, were take place simultaneously.

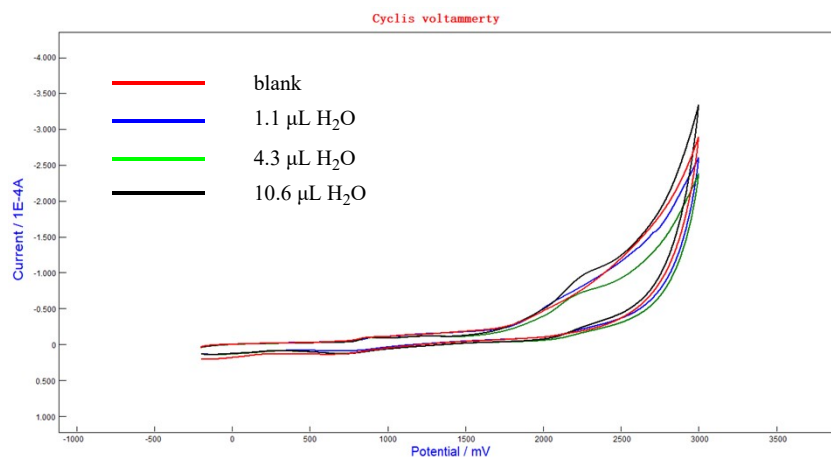

**Figure S7.** Red line: cyclic voltammogram of none in an electrolyte of  $n\text{Bu}_4\text{NBF}_4$  in  $\text{CH}_3\text{CN}$ ; Blue line: cyclic voltammogram of 1.1  $\mu\text{L}$   $\text{H}_2\text{O}$  in an electrolyte of  $n\text{Bu}_4\text{NBF}_4$  in  $\text{CH}_3\text{CN}$ ; Green line: cyclic voltammogram of 4.3  $\mu\text{L}$   $\text{H}_2\text{O}$  in an electrolyte of  $n\text{Bu}_4\text{NBF}_4$  in  $\text{CH}_3\text{CN}$ ; Black line: cyclic voltammogram of 8.6  $\mu\text{L}$   $\text{H}_2\text{O}$  in an electrolyte of  $n\text{Bu}_4\text{NBF}_4$  in  $\text{CH}_3\text{CN}$ .

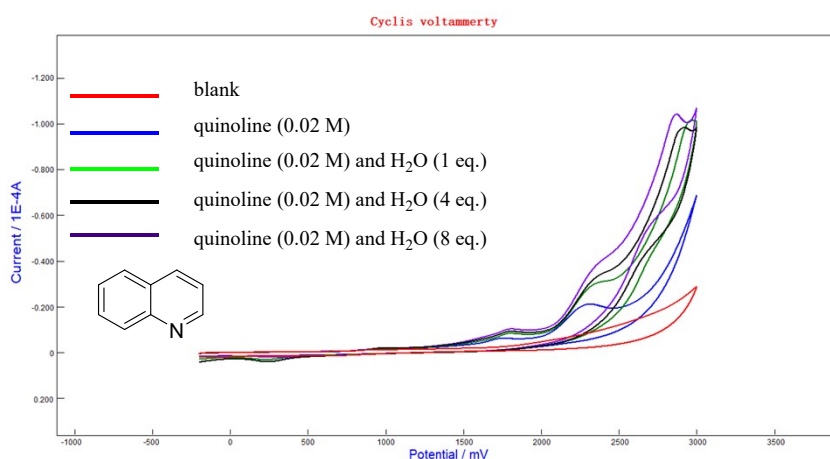

**Figure S8.** Red line: cyclic voltammogram of none in an electrolyte of  $n\text{Bu}_4\text{NBF}_4$  in  $\text{CH}_3\text{CN}$ ; Blue line: cyclic voltammogram of quinoline (0.02 M) in an electrolyte of  $n\text{Bu}_4\text{NBF}_4$  in  $\text{CH}_3\text{CN}$ ; Green line: cyclic voltammogram of quinoline (0.02 M) and 1.1  $\mu\text{L}$   $\text{H}_2\text{O}$  (1 eq.) in an electrolyte of  $n\text{Bu}_4\text{NBF}_4$  in  $\text{CH}_3\text{CN}$ ; Black line: cyclic voltammogram of quinoline (0.02 M) and 4.3  $\mu\text{L}$   $\text{H}_2\text{O}$  (4 eq.) in an electrolyte of  $n\text{Bu}_4\text{NBF}_4$  in  $\text{CH}_3\text{CN}$ ; Purple line: cyclic voltammogram of quinoline (0.02 M) and 8.6  $\mu\text{L}$   $\text{H}_2\text{O}$  (8 eq.) in an electrolyte of  $n\text{Bu}_4\text{NBF}_4$  in  $\text{CH}_3\text{CN}$ .

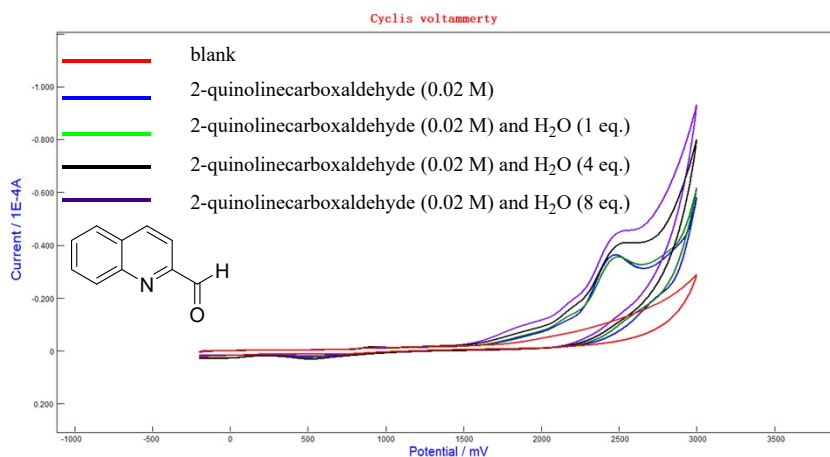

**Figure S9.** Red line: cyclic voltammogram of none in an electrolyte of  $n\text{Bu}_4\text{NBF}_4$  in  $\text{CH}_3\text{CN}$ ; Blue line: cyclic voltammogram of 2-quinolinecarboxaldehyde (0.02 M) in an electrolyte of  $n\text{Bu}_4\text{NBF}_4$  in  $\text{CH}_3\text{CN}$ ; Green line: cyclic voltammogram of 2-quinolinecarboxaldehyde (0.02 M) and 1.1  $\mu\text{L}$  H<sub>2</sub>O (1 eq.) in an electrolyte of  $n\text{Bu}_4\text{NBF}_4$  in  $\text{CH}_3\text{CN}$ ; Purple line: cyclic voltammogram of 2-quinolinecarboxaldehyde (0.02 M) and 4.3  $\mu\text{L}$  H<sub>2</sub>O (4 eq.) in an electrolyte of  $n\text{Bu}_4\text{NBF}_4$  in  $\text{CH}_3\text{CN}$ ; Black line: cyclic voltammogram of 2-quinolinecarboxaldehyde (0.02 M) and 8.6  $\mu\text{L}$  H<sub>2</sub>O (8 eq.) in an electrolyte of  $n\text{Bu}_4\text{NBF}_4$  in  $\text{CH}_3\text{CN}$ .

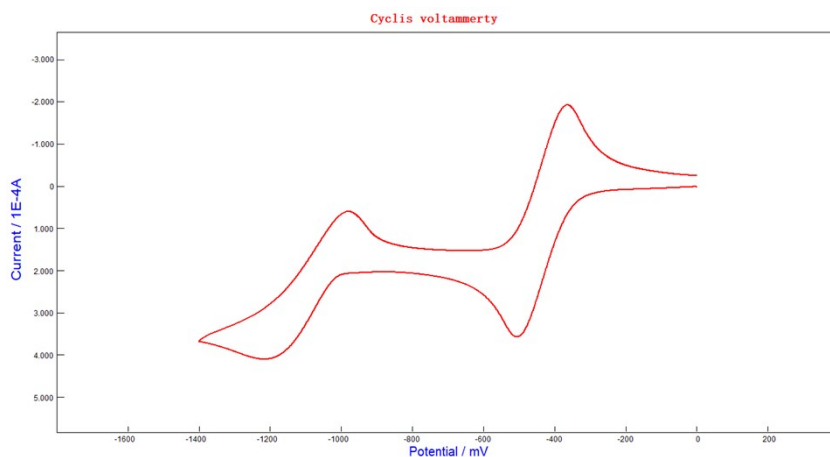

**Figure S10.** Cyclic voltammogram of **1** (0.02 M) in an electrolyte of  $n\text{Bu}_4\text{NBF}_4$  (0.1 M) in  $\text{CH}_3\text{CN}$ .  $E_{\text{rel}} = -0.51$  V,  $E_{\text{rel}2} = -1.21$  V.

## E: Characterization Data for the Electrolysis Products

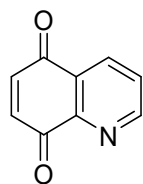

### quinoline-5,8-dione

Yellow solid, 75% yield, Electricity = 5.0 F mol<sup>-1</sup>. <sup>1</sup>H NMR (400 MHz, Chloroform-*d*) δ 9.02 (d, *J* = 4.7 Hz, 1H), 8.39 (d, *J* = 7.8 Hz, 1H), 7.69 (dd, *J* = 7.9, 4.6 Hz, 1H), 7.13 (d, *J* = 10.4 Hz, 1H), 7.04 (d, *J* = 10.4 Hz, 1H). <sup>13</sup>C NMR (101 MHz, Chloroform-*d*) δ 184.5, 183.2, 154.8, 147.4, 139.1, 138.1, 134.6, 129.1, 127.9.

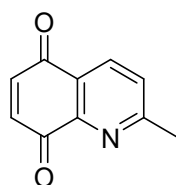

### 2-methylquinoline-5,8-dione

Yellow solid, 78% yield, Electricity = 4.8 F mol<sup>-1</sup>. <sup>1</sup>H NMR (400 MHz, Chloroform-*d*) δ 8.28 (d, *J* = 8.0 Hz, 1H), 7.54 (d, *J* = 8.0 Hz, 1H), 7.10 (d, *J* = 10.4 Hz, 1H), 7.01 (d, *J* = 10.4 Hz, 1H), 2.76 (s, 3H). <sup>13</sup>C NMR (101 MHz, Chloroform-*d*) δ 184.6, 183.5, 165.1, 146.9, 138.8, 137.8, 134.6, 127.8, 126.9, 25.3.

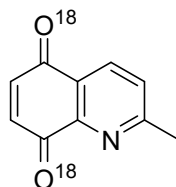

### 2-methylquinoline-5,8-dione

Yellow solid, 79% yield, Electricity = 4.7 F mol<sup>-1</sup>. <sup>1</sup>H NMR (600 MHz, Acetone-*d*<sub>6</sub>) δ 8.30 (d, *J* = 5.7 Hz, 1H), 7.74 (d, *J* = 5.6 Hz, 1H), 7.15 (d, *J* = 5.8 Hz, 1H), 7.11 (d, *J* = 10.6 Hz, 1H), 2.72 (s, 3H), <sup>13</sup>C NMR (151 MHz, Acetone-*d*<sub>6</sub>) δ 185.2, 183.5, 164.9, 147.5, 139.5, 138.0, 134.5, 127.9, 127.6, 24.5. HRMS (EI): exact mass calculated for C<sub>10</sub>H<sub>7</sub>NO<sub>2</sub> [M]<sup>+</sup> require *m/z* = 177.0477, found *m/z* = 177.0479

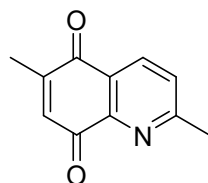

### 2,6-dimethylquinoline-5,8-dione

Yellow solid, 70% yield, Electricity = 5.3 F mol<sup>-1</sup>. <sup>1</sup>H NMR (400 MHz, Chloroform-*d*) δ 8.25 (d, *J* = 8.0 Hz, 1H), 7.47 (d, *J* = 8.0 Hz, 1H), 6.91 (q, *J* = 1.6 Hz, 1H), 2.71 (s, 3H), 2.16 (d, *J* = 1.6 Hz, 3H). <sup>13</sup>C NMR (101 MHz, Chloroform-*d*) δ 184.9, 183.6, 164.7, 147.5, 147.1, 135.7, 134.6, 127.4, 126.9, 25.1, 16.1.

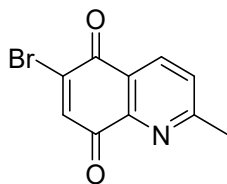

### 6-bromo-2-methylquinoline-5,8-dione

Yellow solid, 63% yield, Electricity = 5.9 F mol<sup>-1</sup>. <sup>1</sup>H NMR (400 MHz, Chloroform-*d*) δ 8.35 (d, *J* = 8.1 Hz, 1H), 7.61 (s, 1H), 7.54 (d, *J* = 8.1 Hz, 1H), 2.76 (s, 3H). <sup>13</sup>C NMR (101 MHz, Chloroform-*d*) δ 180.9, 177.5, 165.7, 146.7, 140.2, 139.4, 135.6, 127.8, 126.1, 25.3.

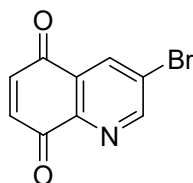

### 3-bromoquinoline-5,8-dione

Yellow solid, 68% yield, Electricity = 5.5 F mol<sup>-1</sup>. <sup>1</sup>H NMR (400 MHz, Chloroform-*d*) δ 9.07 (d, *J* = 2.3 Hz, 1H), 8.53 (d, *J* = 2.3 Hz, 1H), 7.20 (d, *J* = 10.4 Hz, 1H), 7.11 (d, *J* = 10.5 Hz, 1H). <sup>13</sup>C NMR (101 MHz, Chloroform-*d*) δ 183.3, 182.3, 155.8, 145.3, 139.3, 137.7, 136.7, 129.5, 125.9. HRMS (EI): exact mass calculated for C<sub>9</sub>H<sub>4</sub>BrNO<sub>2</sub> [M]<sup>+</sup> require *m/z* = 236.9425, found *m/z* = 236.9427.

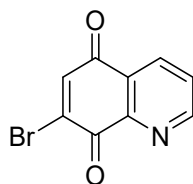

### 7-bromoquinoline-5,8-dione

Yellow solid, 57% yield, Electricity = 6.5 F mol<sup>-1</sup>. <sup>1</sup>H NMR (400 MHz, Acetone-*d*<sub>6</sub>) δ 9.09 (dd, *J* = 4.6, 1.7 Hz, 1H), 8.55 (dd, *J* = 7.9, 1.7 Hz, 1H), 7.92 (dd, *J* = 8.0, 4.6 Hz, 1H), 7.79 (s, 1H). <sup>13</sup>C NMR (101 MHz, Acetone-*d*<sub>6</sub>) δ 181.2, 178.6, 155.3, 148.2, 141.5, 139.1, 135.6, 129.3, 128.5.

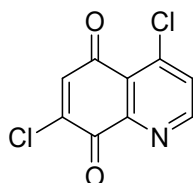

### 4,7-dichloroquinoline-5,8-dione

Yellow solid, 65% yield, Electricity = 5.7 F mol<sup>-1</sup>. <sup>1</sup>H NMR (400 MHz, Acetone-*d*<sub>6</sub>) δ 8.94 (d, *J* = 5.2 Hz, 1H), 7.96 (d, *J* = 5.2 Hz, 1H), 7.45 (s, 1H). <sup>13</sup>C NMR (101 MHz, Acetone-*d*<sub>6</sub>) δ 181.4, 175.7, 154.1, 150.4, 145.1, 144.3, 137.1, 131.3, 126.4. HRMS (EI): exact mass calculated for C<sub>9</sub>H<sub>3</sub>Cl<sub>2</sub>NO<sub>2</sub> [M]<sup>+</sup> require *m/z* = 226.9541, found *m/z* = 226.9544.

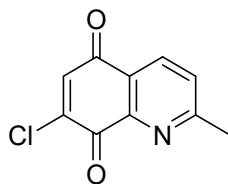

### 7-chloro-2-methylquinoline-5,8-dione

Yellow solid, 72% yield, Electricity = 5.2 F mol<sup>-1</sup>. <sup>1</sup>H NMR (400 MHz, DMSO-*d*<sub>6</sub>) δ 8.23 (d, *J* = 8.0 Hz, 1H), 7.73 (d, *J* = 8.0 Hz, 1H), 7.50 (s, 1H), 2.66 (s, 3H). <sup>13</sup>C NMR (101 MHz, DMSO-*d*<sub>6</sub>) δ 182.9, 176.4, 164.5, 147.2, 146.1, 135.3, 134.8, 128.3, 127.3, 25.0.

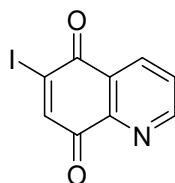

### 6-iodoquinoline-5,8-dione

Yellow solid, 74% yield, Electricity = 5.0 F mol<sup>-1</sup>. <sup>1</sup>H NMR (400 MHz, Acetone-*d*<sub>6</sub>) δ 9.08 (dd, *J* = 4.6, 1.7 Hz, 1H), 8.53 (dd, *J* = 7.9, 1.7 Hz, 1H), 8.12 (s, 1H), 7.89 (dd, *J* = 8.0, 4.6 Hz, 1H). <sup>13</sup>C NMR (151 MHz, Acetone-*d*<sub>6</sub>) δ 180.6, 179.7, 155.0, 149.1, 148.0, 135.7, 128.2, 127.7, 121.4. HRMS (EI): exact mass calculated for C<sub>9</sub>H<sub>4</sub>INO<sub>2</sub> [M]<sup>+</sup> require *m/z* = 284.9287, found *m/z* = 284.9286.

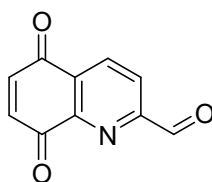

### 5,8-dioxo-5,8-dihydroquinoline-2-carbaldehyde

Yellow solid, 62% yield, Electricity = 6.0 F mol<sup>-1</sup>. <sup>1</sup>H NMR (600 MHz, Acetone-*d*<sub>6</sub>) δ 10.21 (s, 1H), 8.68 (d, *J* = 8.0 Hz, 1H), 8.35 (d, *J* = 8.0 Hz, 1H), 7.33 (d, *J* = 10.4 Hz, 1H), 7.26 (d, *J* = 10.5 Hz, 1H). <sup>13</sup>C NMR (151 MHz, Acetone-*d*<sub>6</sub>) δ 192.5, 184.6, 182.7, 155.8, 148.3, 140.2, 138.5, 136.4, 131.9, 124.8. HRMS (EI): exact mass calculated for C<sub>10</sub>H<sub>5</sub>NO<sub>3</sub> [M]<sup>+</sup> require *m/z* = 187.0269, found *m/z* = 187.0266.

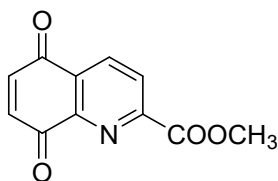

### methyl 5,8-dioxo-5,8-dihydroquinoline-2-carboxylate

Yellow solid, 68% yield, Electricity = 5.5 F mol<sup>-1</sup>. <sup>1</sup>H NMR (400 MHz, Acetone-*d*<sub>6</sub>) δ 8.63 (d, *J* = 8.1 Hz, 1H), 8.50 (d, *J* = 8.0 Hz, 1H), 7.33-7.21 (m, 2H), 4.03 (s, 3H). <sup>13</sup>C NMR (151 MHz, Acetone-*d*<sub>6</sub>) δ 184.6, 182.6, 164.8, 152.2, 147.9, 140.2, 138.3, 136.1, 131.3, 128.6, 52.8. HRMS (EI): exact mass calculated for C<sub>11</sub>H<sub>7</sub>NO<sub>4</sub> [M]<sup>+</sup> require *m/z* = 217.0375, found *m/z* = 217.0378.



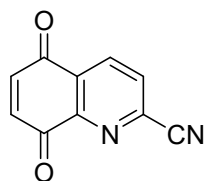

#### 5,8-dioxo-5,8-dihydroquinoline-2-carbonitrile

Yellow solid, 71% yield, Electricity = 5.3 F mol<sup>-1</sup>. <sup>1</sup>H NMR (400 MHz, Acetone-*d*<sub>6</sub>) δ 8.71 (d, *J* = 8.0 Hz, 1H), 8.43 (d, *J* = 8.0 Hz, 1H), 7.31 (q, *J* = 10.5 Hz, 2H). <sup>13</sup>C NMR (101 MHz, Acetone-*d*<sub>6</sub>) δ 184.1, 181.8, 148.8, 140.2, 138.7, 137.7, 136.7, 132.7, 131.3, 116.9. HRMS (EI): exact mass calculated for C<sub>10</sub>H<sub>4</sub>N<sub>2</sub>O<sub>2</sub> [M]<sup>+</sup> require *m/z* = 184.0273, found *m/z* = 184.0270.

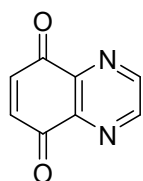

#### quinoxaline-5,8-dione

Yellow solid, 62% yield, Electricity = 6.0 F mol<sup>-1</sup>. <sup>1</sup>H NMR (400 MHz, Acetone-*d*<sub>6</sub>) δ 9.11 (s, 2H), 7.29 (s, 2H). <sup>13</sup>C NMR (101 MHz, Acetone-*d*<sub>6</sub>) δ 183.5(×2), 149.3(×2), 144.8(×2), 139.1(×2).

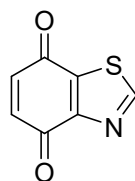

#### benzo[d]thiazole-4,7-dione

Yellow solid, 58% yield, Electricity = 6.4 F mol<sup>-1</sup>. <sup>1</sup>H NMR (400 MHz, Chloroform-*d*) δ 9.13 (s, 1H), 6.91 (d, *J* = 2.9 Hz, 2H). <sup>13</sup>C NMR (101 MHz, Chloroform-*d*) δ 180.1, 179.2, 159.2, 152.9, 139.6, 137.6, 137.4.

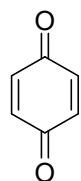

#### benzoquinone

Yellow solid, 56% yield, Electricity = 6.6 F mol<sup>-1</sup>. <sup>1</sup>H NMR (400 MHz, Acetone-*d*<sub>6</sub>) δ 6.87 (s, 4H). <sup>13</sup>C NMR (101 MHz, Acetone-*d*<sub>6</sub>) δ 187.9(×2), 137.1(×2).

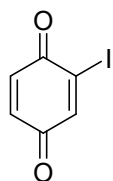

#### 2-iodocyclohexa-2,5-diene-1,4-dione

Yellow solid, 56% yield, Electricity = 6.6 F mol<sup>-1</sup>. <sup>1</sup>H NMR (400 MHz, Acetone-*d*<sub>6</sub>) δ

7.78 (d,  $J = 2.4$  Hz, 1H), 7.12 (d,  $J = 10.1$  Hz, 1H), 6.97 (dd,  $J = 10.1, 2.4$  Hz, 1H).  $^{13}\text{C}$  NMR (151 MHz, Acetone- $d_6$ )  $\delta$  184.7, 181.0, 146.6, 137.1, 135.1, 119.4.

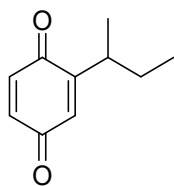

### 2-(sec-butyl)cyclohexa-2,5-diene-1,4-dione

Yellow solid, 58% yield, Electricity = 6.4 F mol $^{-1}$ .  $^1\text{H}$  NMR (600 MHz, Acetone- $d_6$ )  $\delta$  7.67 (d,  $J = 10.1$  Hz, 1H), 7.60 (dd,  $J = 10.1, 2.5$  Hz, 1H), 7.39 (dd,  $J = 2.5, 1.0$  Hz, 1H), 3.66 (hd,  $J = 7.0, 1.0$  Hz, 1H), 2.47-2.39 (m, 1H), 2.31 (dp,  $J = 13.5, 7.3$  Hz, 1H), 1.96 (d,  $J = 6.9$  Hz, 3H), 1.71 (t,  $J = 7.4$  Hz, 3H).  $^{13}\text{C}$  NMR (151 MHz, Acetone- $d_6$ )  $\delta$  188.2, 187.5, 153.9, 137.5, 136.3, 131.4, 33.7, 28.7, 18.7, 11.6.

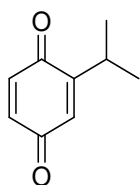

### 2-isopropylcyclohexa-2,5-diene-1,4-dione

Yellow solid, 30% yield, Electricity = 12.4 F mol $^{-1}$ .  $^1\text{H}$  NMR (600 MHz, Acetone- $d_6$ )  $\delta$  8.03 – 7.95 (m, 2H), 7.65 – 7.59 (m, 1H), 7.51 (t,  $J = 7.8$  Hz, 1.93H), 6.81 (d,  $J = 10.1$  Hz, 0.83H), 6.75 (dd,  $J = 10.1, 2.6$  Hz, 0.86H), 6.55 (dd,  $J = 2.6, 1.2$  Hz, 0.86H), 2.99 (pd,  $J = 6.9, 1.2$  Hz, 1H), 2.58 (s, 3H), 1.13 (d,  $J = 6.9$  Hz, 6H).  $^{13}\text{C}$  NMR (151 MHz, Acetone- $d_6$ )  $\delta$  205.5, 197.1, 187.9, 186.9, 154.5, 137.3, 137.1, 135.9, 132.9, 130.1, 128.6, 128.2, 29.0 (dp,  $J = 38.7, 19.4$  Hz), 26.6, 25.9, 20.7( $\times 2$ ).

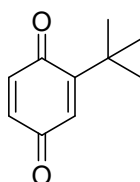

### 2-(tert-butyl)cyclohexa-2,5-diene-1,4-dione

Yellow solid, 38% yield, Electricity = 9.8 F mol $^{-1}$ .  $^1\text{H}$  NMR (400 MHz, Acetone- $d_6$ )  $\delta$  6.78 (d,  $J = 1.7$  Hz, 2H), 6.61 (dd,  $J = 1.7, 0.7$  Hz, 1H), 1.32 (s, 9H).  $^{13}\text{C}$  NMR (101 MHz, Acetone- $d_6$ )  $\delta$  187.9, 187.5, 155.3, 138.6, 134.9, 131.3, 34.8, 28.4( $\times 3$ ).

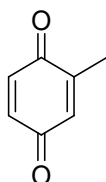

### 2-methylcyclohexa-2,5-diene-1,4-dione

Yellow solid, 63% yield, Electricity = 5.9 F mol $^{-1}$ .  $^1\text{H}$  NMR (400 MHz, Acetone- $d_6$ )  $\delta$  6.85 (d,  $J = 10.1$  Hz, 1H), 6.79 (dd,  $J = 10.1, 2.5$  Hz, 1H), 6.70 (dq,  $J = 3.1, 1.6$  Hz, 1H), 2.05 (d,  $J = 1.7$  Hz, 3H).  $^{13}\text{C}$  NMR (151 MHz, Acetone- $d_6$ )  $\delta$  187.9, 187.9, 146.2,

137.1, 136.8, 133.4, 15.2.

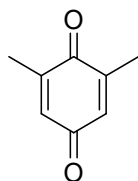

#### 2,6-dimethylcyclohexa-2,5-diene-1,4-dione

Yellow solid, 36% yield, Electricity = 10.3 F mol<sup>-1</sup>. <sup>1</sup>H NMR (600 MHz, Acetone-*d*<sub>6</sub>) δ 6.62 (s, 2H), 2.05 (s, 6H). <sup>13</sup>C NMR (151 MHz, Acetone-*d*<sub>6</sub>) δ 188.2, 187.7, 146.1(×2), 133.3(×2), 15.4(×2).

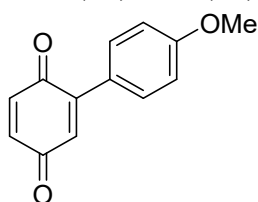

#### 4'-methoxy-[1,1'-biphenyl]-2,5-dione

Yellow solid, 53% yield, Electricity = 7.0 F mol<sup>-1</sup>. <sup>1</sup>H NMR (400 MHz, DMSO-*d*<sub>6</sub>) δ 7.56 – 7.50 (m, 1H), 7.04 – 7.00 (m, 1H), 6.93 (s, 1H), 6.91 – 6.87 (m, 1H), 3.81 (s, 2H), 2.51 (p, *J* = 1.8 Hz, 1H). <sup>13</sup>C NMR (101 MHz, DMSO-*d*<sub>6</sub>) δ 188.2, 187.5, 161.2, 145.0, 137.8, 136.5, 131.5(×2), 131.1, 125.4, 114.3(×2), 55.8.

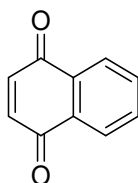

#### naphthalene-1,4-dione

Yellow solid, 40% yield, 57% yield, 37% yield, Electricity = 9.3 F mol<sup>-1</sup>, 6.5 F mol<sup>-1</sup>, 10.0 F mol<sup>-1</sup>. <sup>1</sup>H NMR (400 MHz, Acetone-*d*<sub>6</sub>) δ 8.12 – 8.01 (m, 2H), 7.98-7.85 (m, 2H), 7.07 (s, 2H). <sup>13</sup>C NMR (101 MHz, Acetone-*d*<sub>6</sub>) δ 185.3(×2), 139.3(×2), 134.6(×2), 132.6(×2), 126.6(×2).

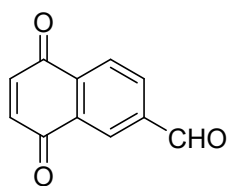

#### 5,8-dioxo-5,8-dihydronaphthalene-2-carbaldehyde

Yellow solid, 62% yield, Electricity = 6.0 F mol<sup>-1</sup>. <sup>1</sup>H NMR (400 MHz, Acetone-*d*<sub>6</sub>) δ 10.31 (s, 1H), 8.58 (d, *J* = 1.7 Hz, 1H), 8.40 (dd, *J* = 7.9, 1.7 Hz, 1H), 8.27 (d, *J* = 7.9 Hz, 1H), 7.19 (d, *J* = 1.1 Hz, 2H). <sup>13</sup>C NMR (101 MHz, Acetone-*d*<sub>6</sub>) δ 192.1, 184.8, 184.6, 140.6, 139.6, 139.5, 135.8, 133.9, 133.3, 127.7, 127.5.

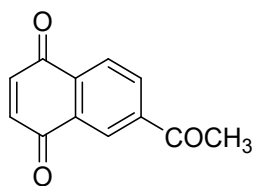

### 6-acetylnaphthalene-1,4-dione

Yellow solid, 67% yield, Electricity = 5.6 F mol<sup>-1</sup>. <sup>1</sup>H NMR (400 MHz, Acetone-*d*<sub>6</sub>) δ 8.56 (dd, *J* = 1.9, 0.6 Hz, 1H), 8.43 (dd, *J* = 8.1, 1.8 Hz, 1H), 8.18 (dd, *J* = 8.0, 0.5 Hz, 1H), 7.16 (d, *J* = 1.4 Hz, 2H), 2.77 (s, 3H). <sup>13</sup>C NMR (101 MHz, Acetone-*d*<sub>6</sub>) δ 196.9, 184.8, 184.7, 141.6, 139.6, 139.46, 134.9, 133.4, 132.8, 127.2, 126.2, 26.8.

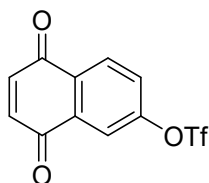

### 5,8-dioxo-5,8-dihydronaphthalen-2-yl trifluoromethanesulfonate

Yellow solid, 54% yield, Electricity = 6.9 F mol<sup>-1</sup>. <sup>1</sup>H NMR (400 MHz, Acetone-*d*<sub>6</sub>) δ 8.31 (d, *J* = 8.5 Hz, 1H), 8.06 (d, *J* = 2.6 Hz, 1H), 8.01 (dd, *J* = 8.6, 2.6 Hz, 1H), 7.20 (d, *J* = 3.0 Hz, 2H). <sup>13</sup>C NMR (101 MHz, Acetone-*d*<sub>6</sub>) δ 183.9, 183.7, 153.5, 139.5, 139.4, 134.9, 132.4, 129.9, 127.4, 119.3 (q, *J* = 320.0 Hz), 119.5. <sup>19</sup>F NMR (376 MHz, Acetone-*d*<sub>6</sub>) δ -73.98.

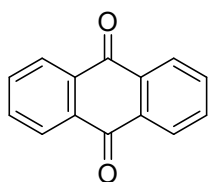

### anthracene-9,10-dione

Yellow solid, 68% yield, Electricity = 5.5 F mol<sup>-1</sup>. <sup>1</sup>H NMR (400 MHz, Chloroform-*d*) δ 8.32 (dd, *J* = 5.8, 3.3 Hz, 4H), 7.81 (dd, *J* = 5.8, 3.3 Hz, 4H). <sup>13</sup>C NMR (101 MHz, Chloroform-*d*) δ 183.4(×2), 134.3(×2), 133.7(×2), 127.4(×2).

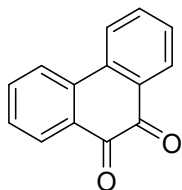

### phenanthrene-9,10-dione

Yellow solid, 56% yield, Electricity = 6.7 F mol<sup>-1</sup>. <sup>1</sup>H NMR (400 MHz, Acetone-*d*<sub>6</sub>) δ 8.32 (d, *J* = 8.0 Hz, 2H), 8.17-8.10 (m, 2H), 7.85 (td, *J* = 7.7, 1.5 Hz, 2H), 7.60 (t, *J* = 7.5 Hz, 2H). <sup>13</sup>C NMR (151 MHz, Acetone-*d*<sub>6</sub>) δ 180.2(×2), 136.3(×2), 136.2(×2), 131.9(×2), 129.9(×2), 129.9(×2), 124.9(×2).

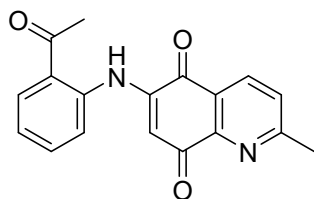

### 6-((2-acetylphenyl)amino)-2-methylquinoline-5,8-dione

Yellow solid, 76% yield,  $^1\text{H}$  NMR (400 MHz, Chloroform-*d*)  $\delta$  10.69 (s, 1H), 8.30 (d,  $J = 8.0$  Hz, 1H), 8.05 (dd,  $J = 8.0, 1.6$  Hz, 1H), 7.60 – 7.49 (m, 2H), 7.44 (d,  $J = 8.0$  Hz, 1H), 7.12 (ddd,  $J = 8.2, 6.9, 1.5$  Hz, 1H), 6.82 (s, 1H), 3.93 (s, 3H), 2.74 (s, 3H).  $^{13}\text{C}$  NMR (101 MHz, Chloroform-*d*)  $\delta$  183.1, 181.6, 167.6, 165.7, 148.1, 143.3, 140.5, 134.9, 134.1, 132.2, 126.7, 125.4, 123.5, 120.5, 119.1, 106.1, 52.6, 25.5. HRMS (EI): exact mass calculated for  $\text{C}_{18}\text{H}_{14}\text{N}_2\text{O}_3$   $[\text{M}]^+$  require  $m/z = 306.1004$ , found  $m/z = 306.1007$ .

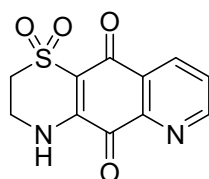

### 3,4-dihydro-2H-[1,4]thiazino[2,3-g]quinoline-5,10-dione 1,1-dioxide

Yellow solid, 51% yield,  $^1\text{H}$  NMR (600 MHz, DMSO-*d*<sub>6</sub>)  $\delta$  9.26 (d,  $J = 68.3$  Hz, 1H), 8.98 (d,  $J = 46.7$  Hz, 1H), 8.36 (d,  $J = 8.0$  Hz, 1H), 7.93-7.71 (m, 1H), 3.87 (s, 2H), 3.39 (s, 2H).  $^{13}\text{C}$  NMR (151 MHz, DMSO-*d*<sub>6</sub>)  $\delta$  177.8, 175.0, 154.1, 148.3, 147.3, 134.9, 130.9, 129.9, 111.4, 49.2 ( $\times 2$ ).

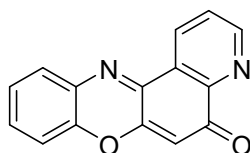

### 5H-pyrido[3,2-a]phenoxazin-5-one

Yellow solid, 38% yield,  $^1\text{H}$  NMR (600 MHz, DMSO-*d*<sub>6</sub>)  $\delta$  9.10 (dd,  $J = 4.5, 1.7$  Hz, 1H), 9.03 (dd,  $J = 8.1, 1.7$  Hz, 1H), 7.94 (dd,  $J = 8.1, 4.3$  Hz, 2H), 7.73-7.66 (m, 1H), 7.59-7.54 (m, 1H), 7.54-7.49 (m, 1H), 6.60 (s, 1H).  $^{13}\text{C}$  NMR (151 MHz, DMSO-*d*<sub>6</sub>)  $\delta$  181.9, 153.6, 151.5, 147.1, 144.3, 133.3, 132.9, 132.7, 130.1, 128.3, 127.1, 126.2, 116.6, 108.2, 55.4.

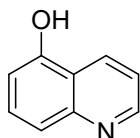

### quinolin-5-ol

Yellow solid, 28% yield, Electricity =  $13.3 \text{ F mol}^{-1}$ .  $^1\text{H}$  NMR (400 MHz, DMSO-*d*<sub>6</sub>)  $\delta$  9.54-9.49 (m, 1H), 9.22 (dd,  $J = 8.5, 1.8$  Hz, 1H), 8.20 (t,  $J = 8.0$  Hz, 1H), 8.15-8.03 (m, 2H), 7.66 (d,  $J = 7.6$  Hz, 1H).  $^{13}\text{C}$  NMR (101 MHz, DMSO-*d*<sub>6</sub>)  $\delta$  155.7, 151.1, 150.0, 131.8, 130.9, 121.1, 120.5, 119.1, 109.4.

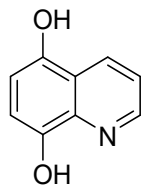

**quinoline-5,8-diol**

Yellow solid, 26% yield, Electricity = 14.3 F mol<sup>-1</sup>. <sup>1</sup>H NMR (400 MHz, DMSO-*d*<sub>6</sub>) δ 8.81 (dd, *J* = 4.2, 1.7 Hz, 1H), 8.45 (dd, *J* = 8.5, 1.7 Hz, 1H), 7.48 (dd, *J* = 8.5, 4.2 Hz, 1H), 6.90 (d, *J* = 8.2 Hz, 1H), 6.79 (d, *J* = 8.2 Hz, 1H). <sup>13</sup>C NMR (101 MHz, DMSO-*d*<sub>6</sub>) δ 148.5, 145.6, 144.8, 138.7, 131.2, 120.7, 120.1, 110.9, 108.9. HRMS (EI): exact mass calculated for C<sub>9</sub>H<sub>7</sub>NO<sub>2</sub> [M]<sup>+</sup> require *m/z* = 161.0477, found *m/z* = 161.0478.



## 2: 2-methylquinoline-5,8-dione

Y30181093-1015-61C.1.fid

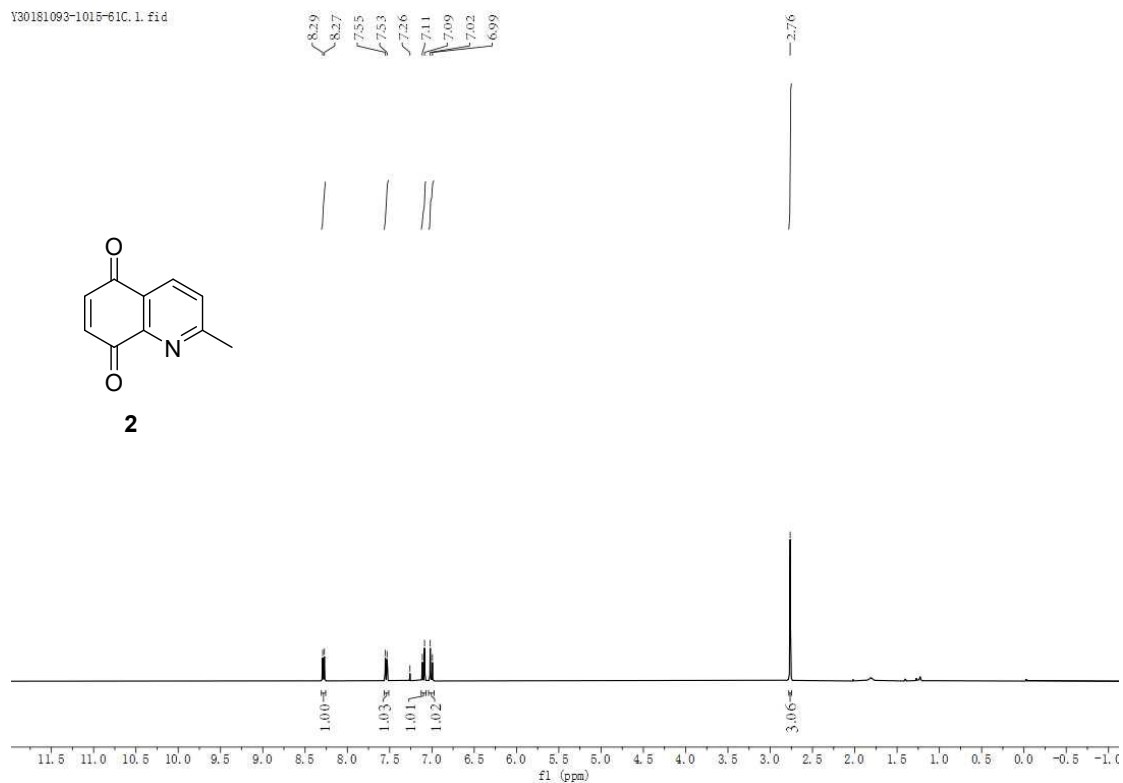

Y30181093-1015-61C.d.fid

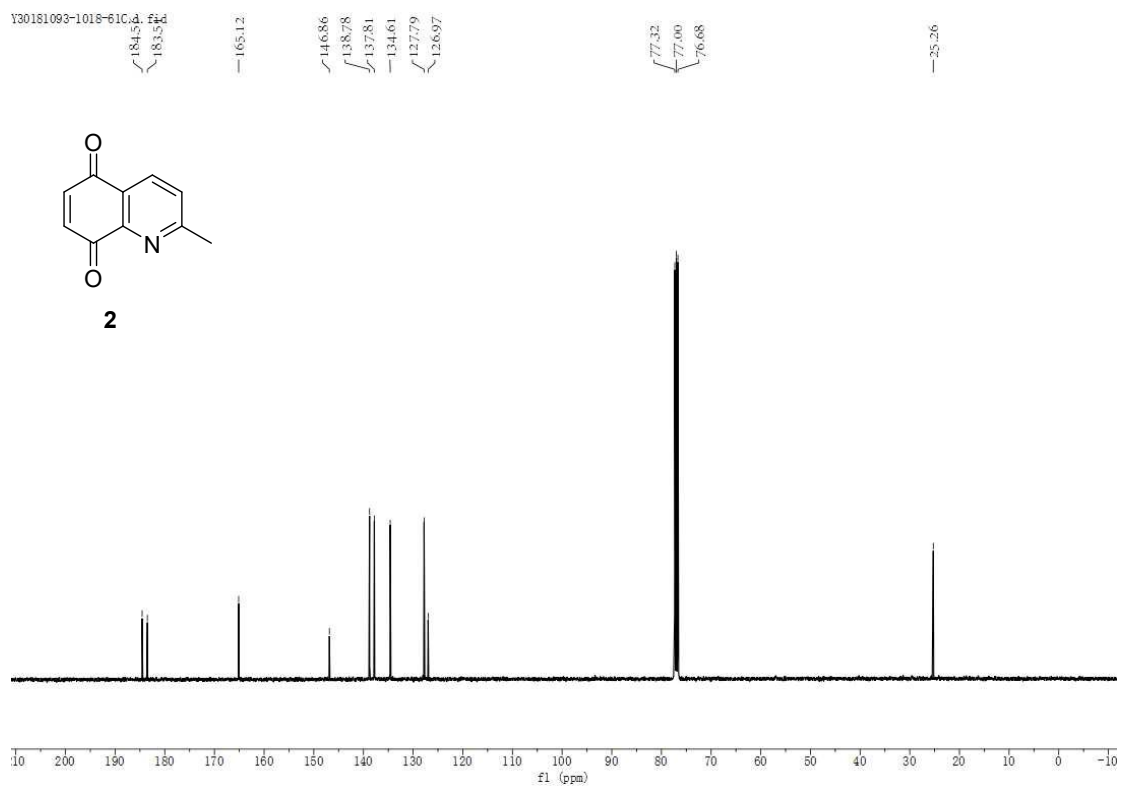



### 3: 2-methylquinoline-5,8-dione

Y30181093-0713-126C.1.fid

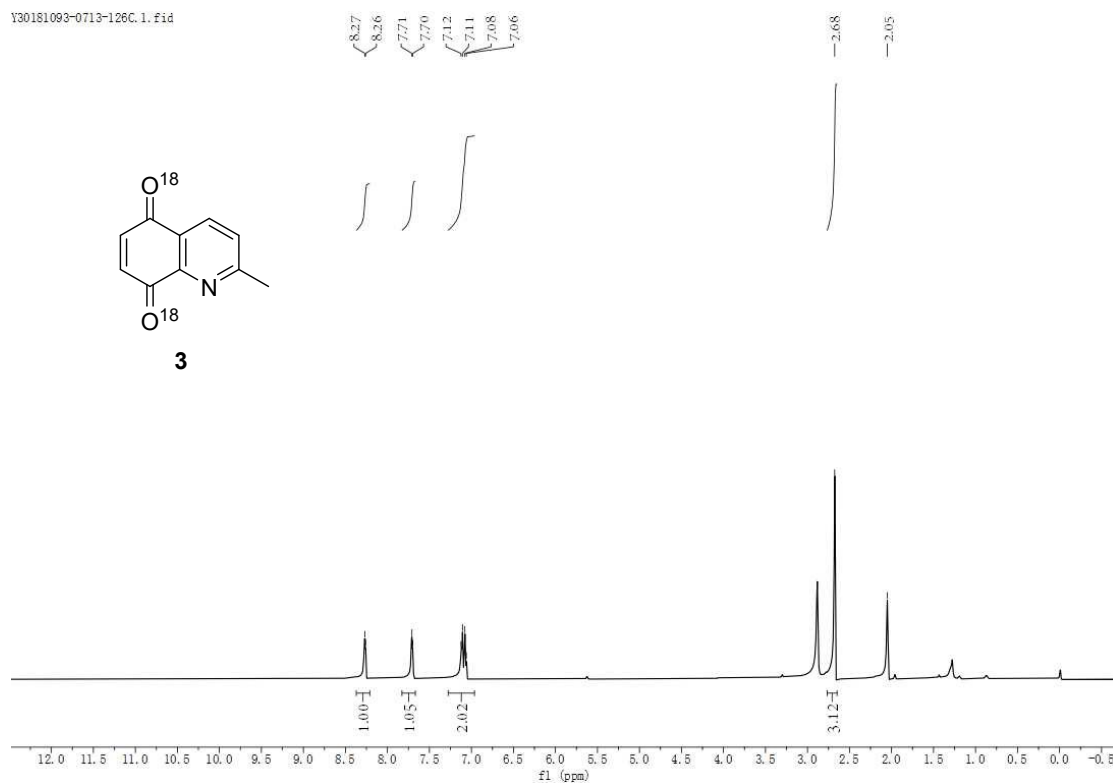

BNZ.6371688b13alc579.106002.fid

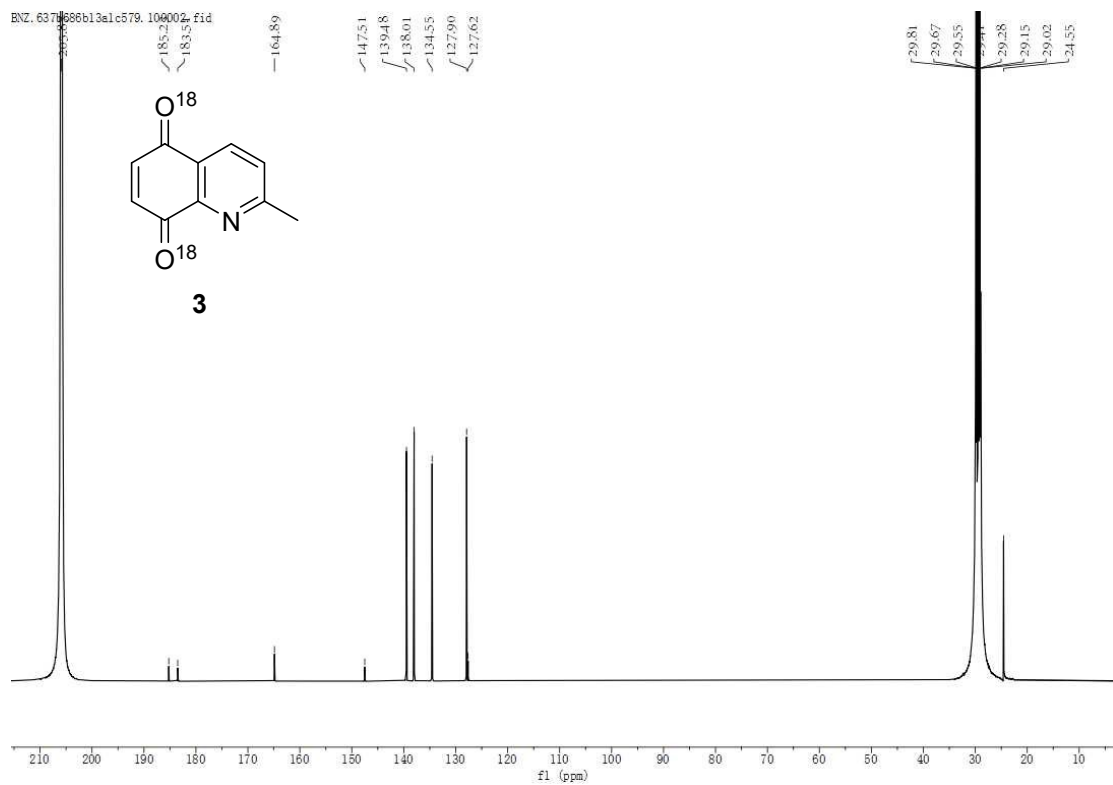

# 4: 2,6-dimethylquinoline-5,8-dione

Y30181093-1109-82A.1.fid

8.26  
8.24  
7.48  
7.46  
7.26  
6.92  
6.91  
6.91

2.71  
2.16  
2.16

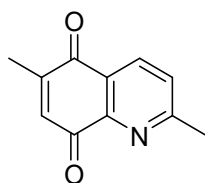

4

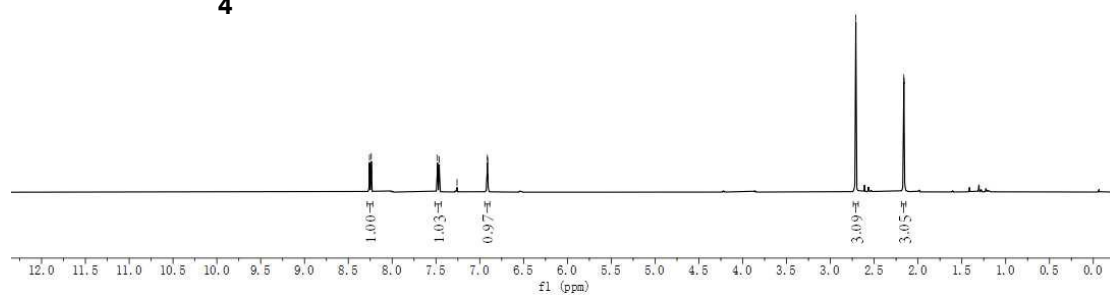

Y30181093-1109-82A.1.fid

184.91  
183.53

164.68

147.48  
147.11

135.73  
134.62

127.40  
126.96

77.32  
77.00  
76.68

25.14

16.12

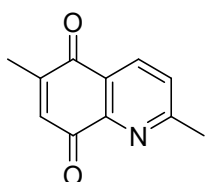

4

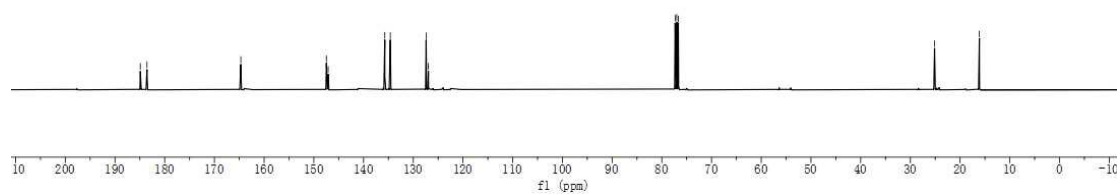

# 5: 6-bromo-2-methylquinoline-5,8-dione

Y30181093-1109-82E.1.fid

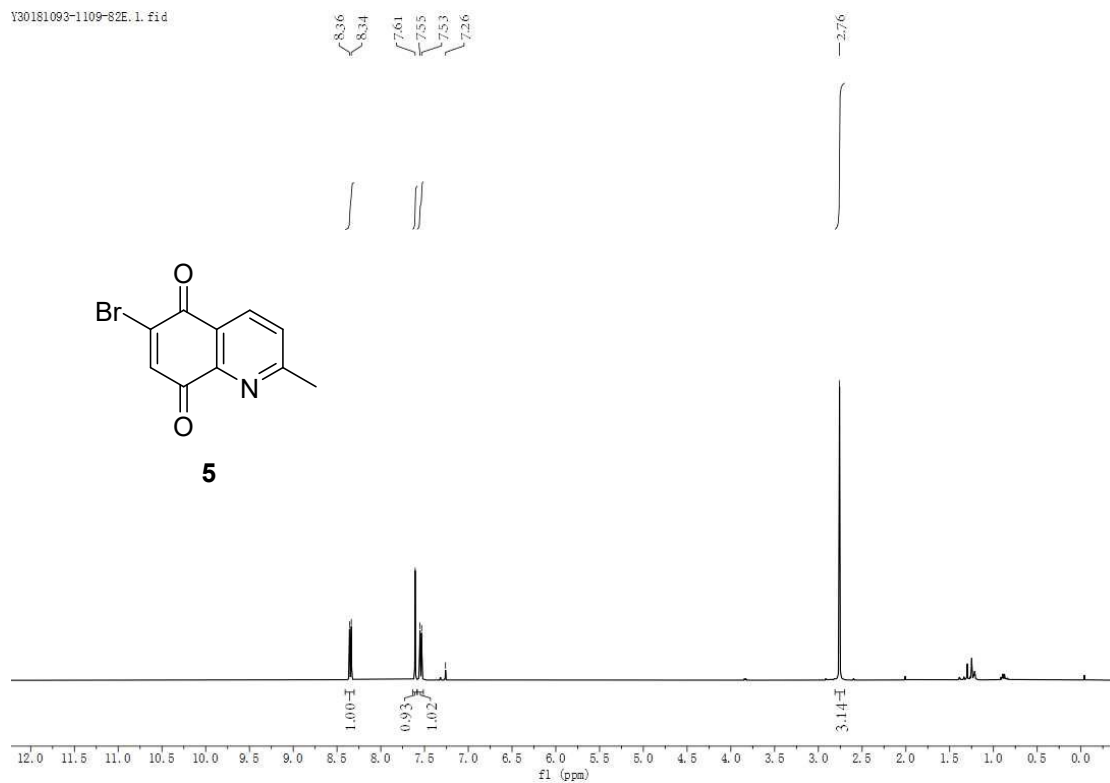

Y30181093-1109-82E.1.fid

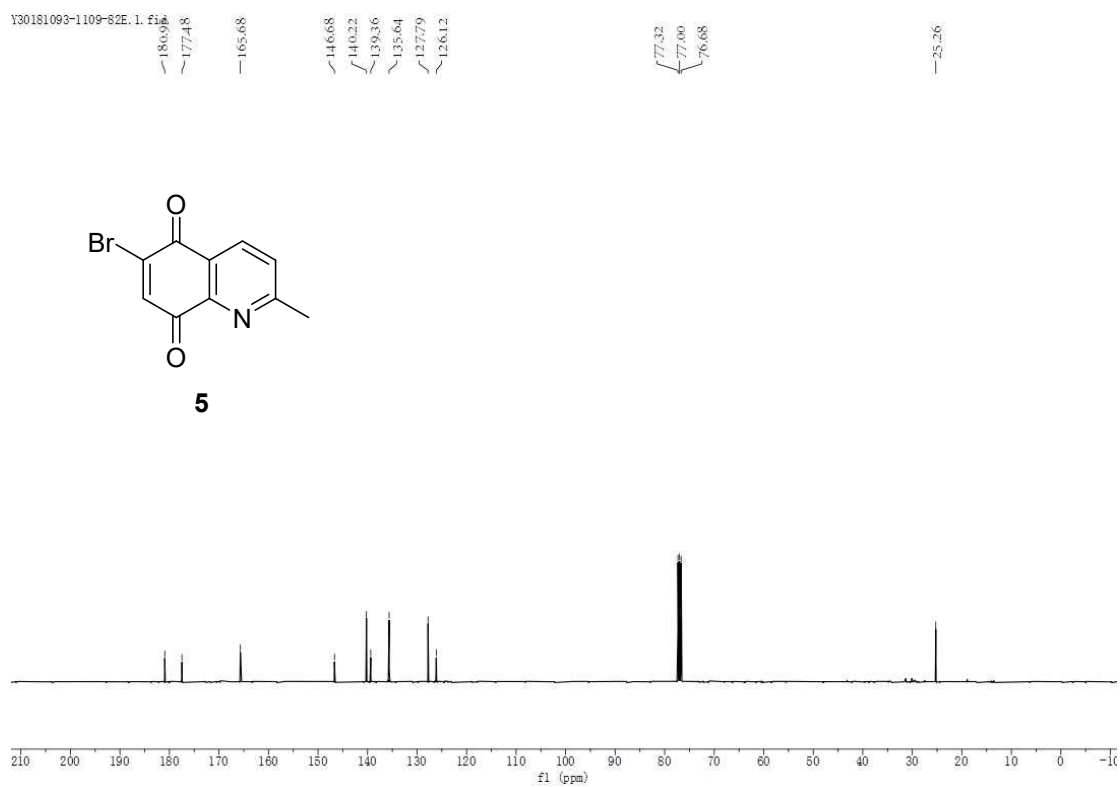

### 6. 3-bromoquinoline-5,8-dione

Y30181093-1025-69C\_1.fid

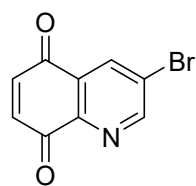

6

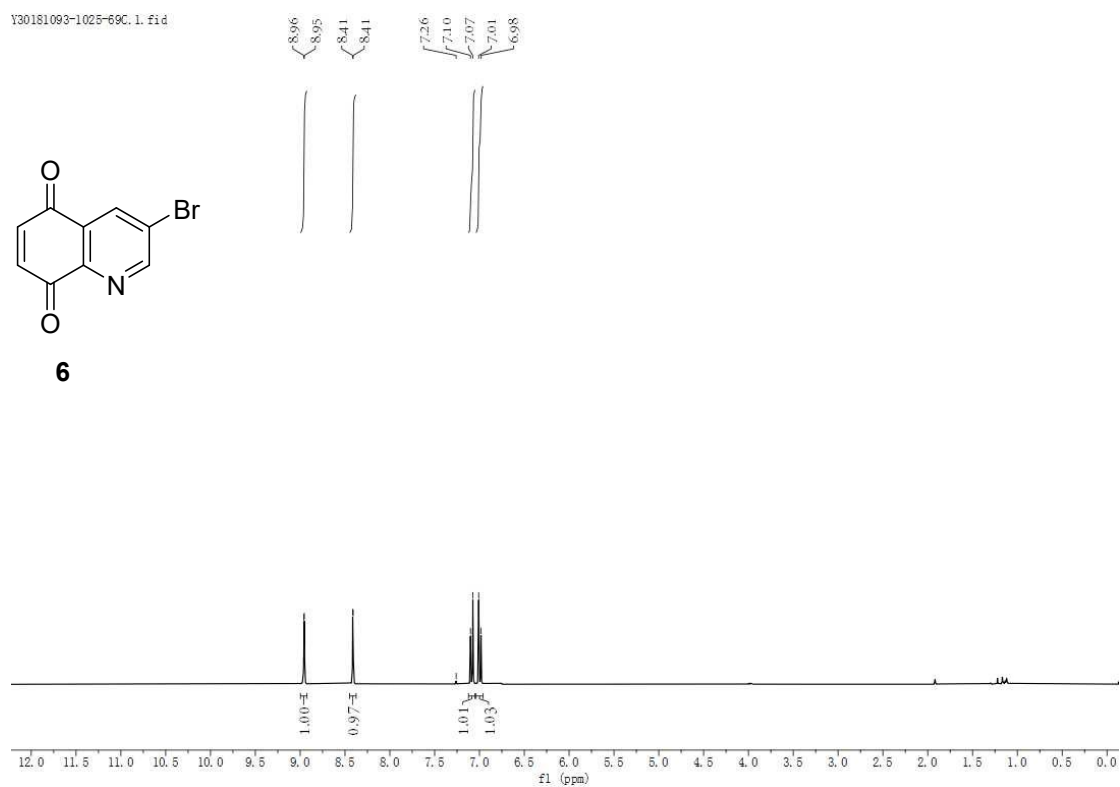

Y30181093-1025-69C\_1.fid

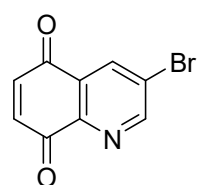

6

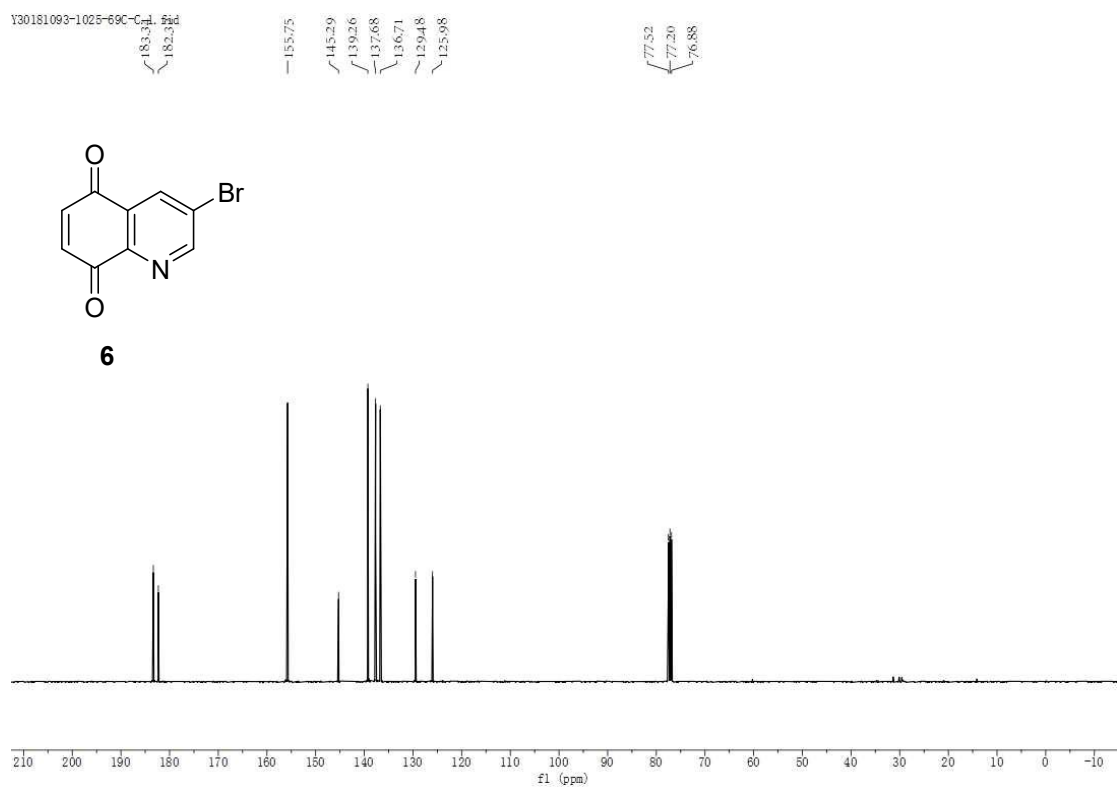

# 7: 7-bromoquinoline-5,8-dione

Y30181093-1203-85D. 1. F16

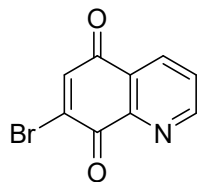

7

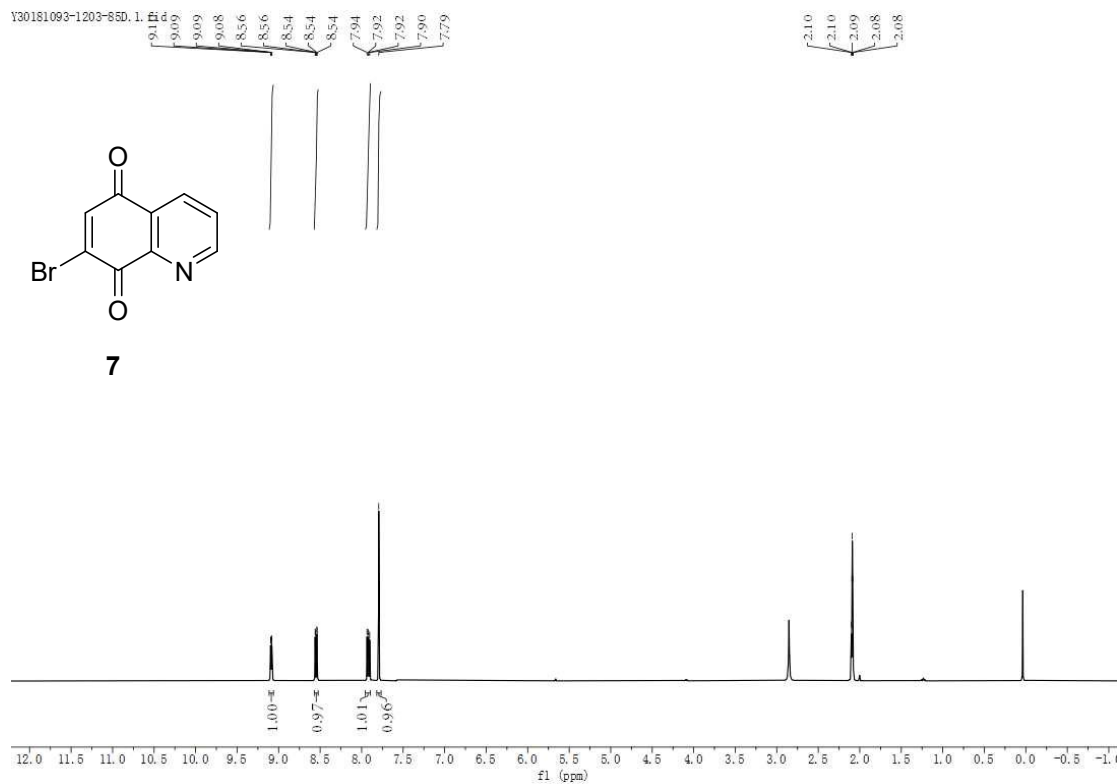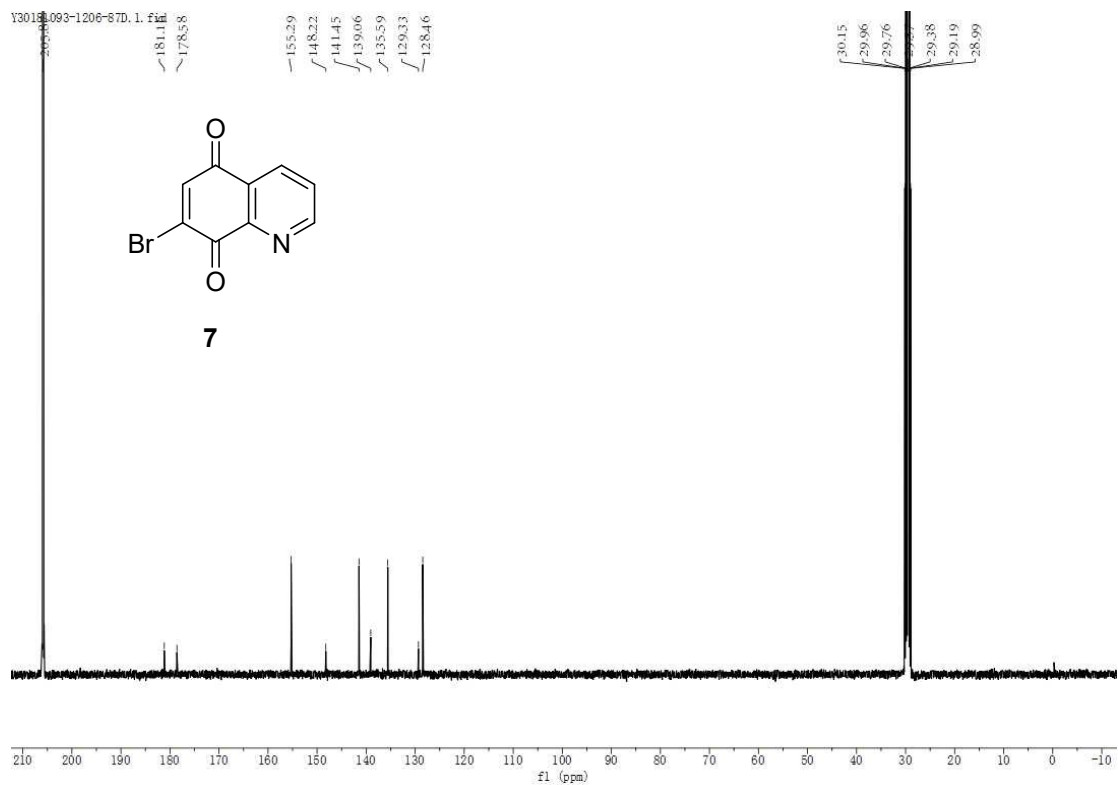

# 8. 4,7-dichloroquinoline-5,8-dione

Y30181093-1130-86A.1.fid

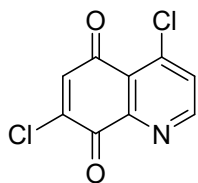

8

8.94  
8.93

7.97  
7.95

7.45  
7.45

2.10  
2.10  
2.09  
2.08  
2.08

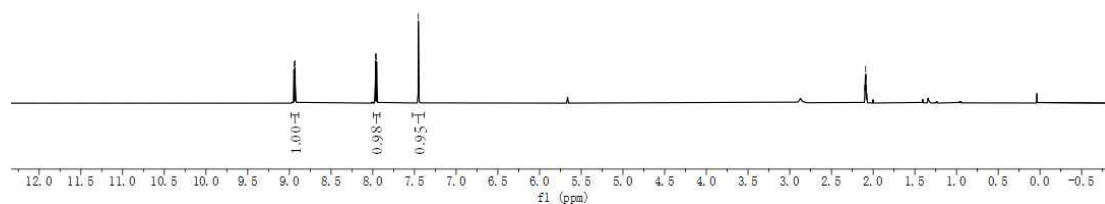

Y30181093-1203-86A-1.1.fid

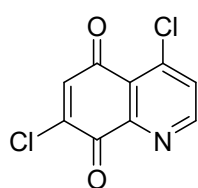

8

181.37  
175.70

154.07  
150.39  
145.08  
144.29  
137.09  
131.29  
126.35

30.13  
29.94  
29.74  
29.36  
29.17  
28.98

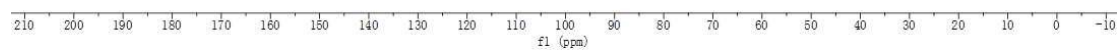

# 9: 7-chloro-2-methylquinoline-5,8-dione

Y30181093-1105-82B.1.fid

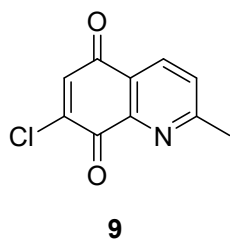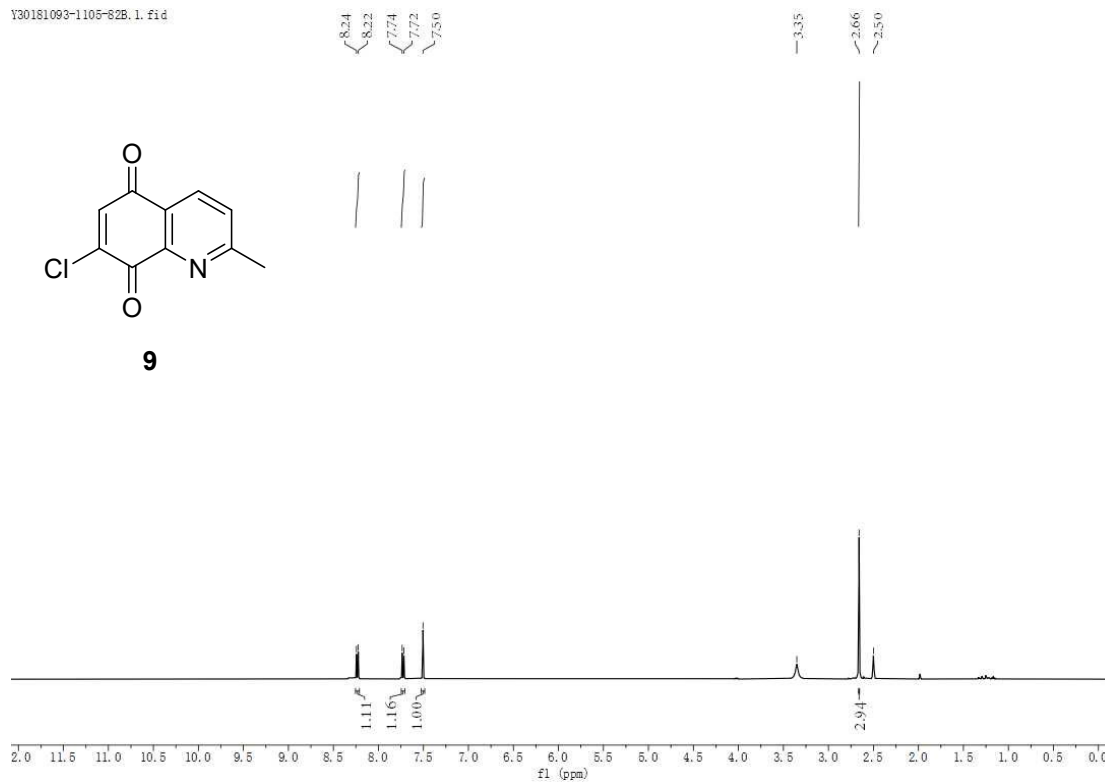

Y30181093-1105-82B.1.fid

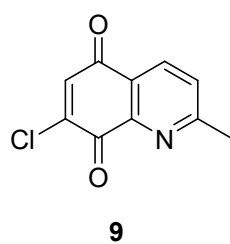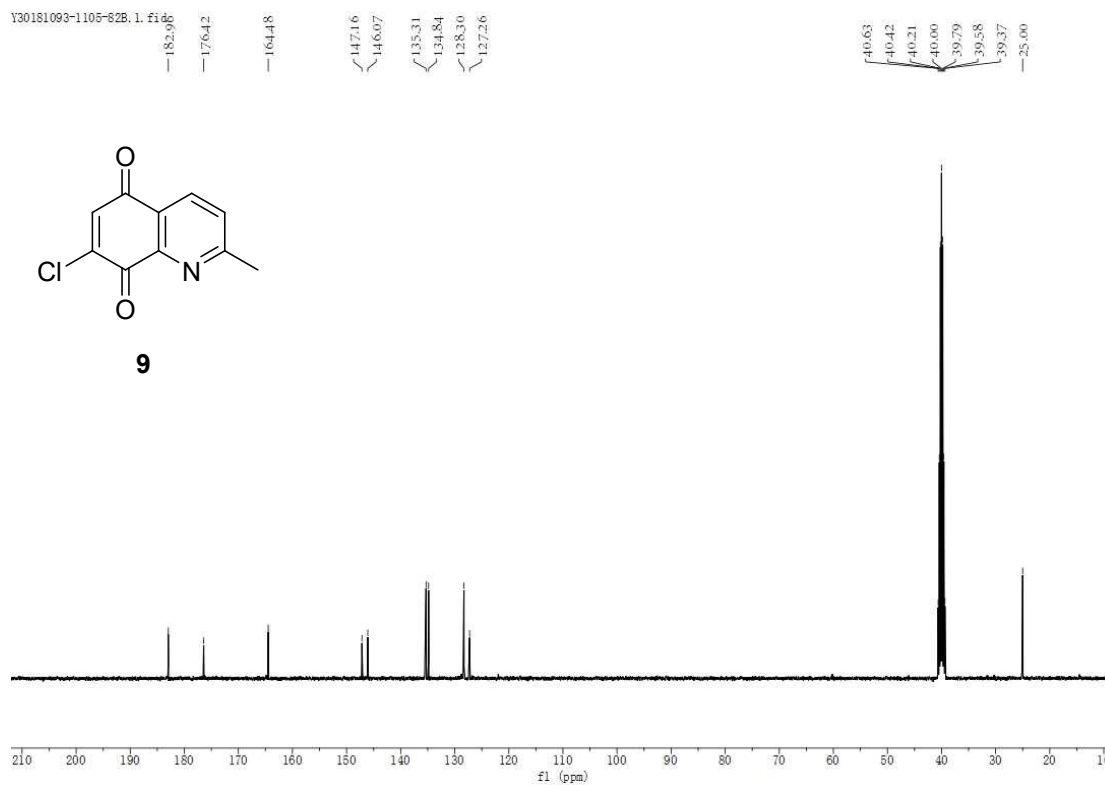

# 10: 6-iodoquinoline-5,8-dione

Y30181093-0711-124A.1.fid

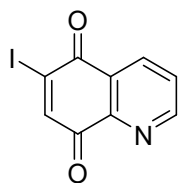

10

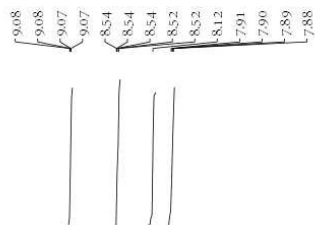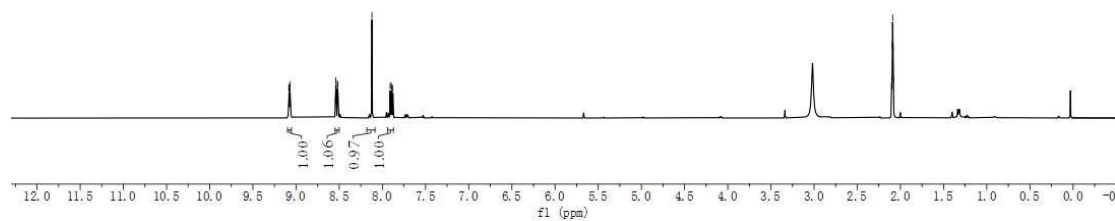

Y30181093-0713-124A.1000000.fid

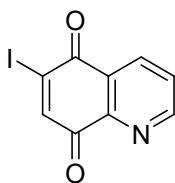

10

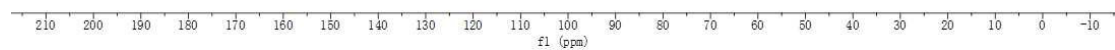



# 11: 5,8-dioxo-5,8-dihydroquinoline-2-carbaldehyde

Y30181093-0722-129A.1.fid

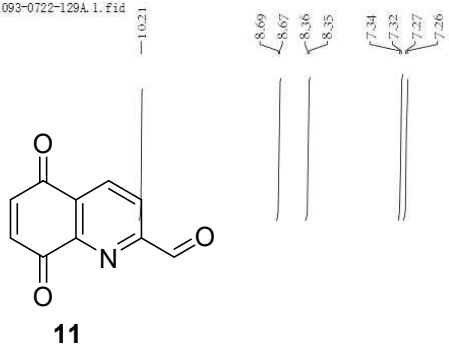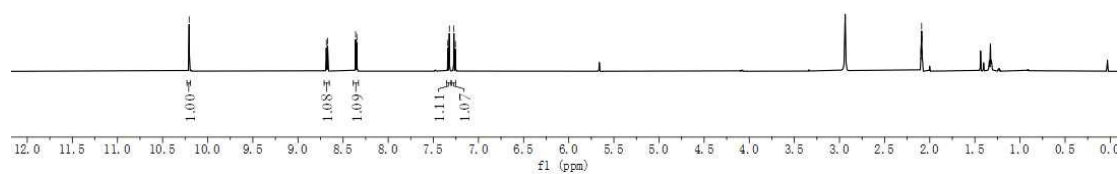

BNZ.637e03191.fid

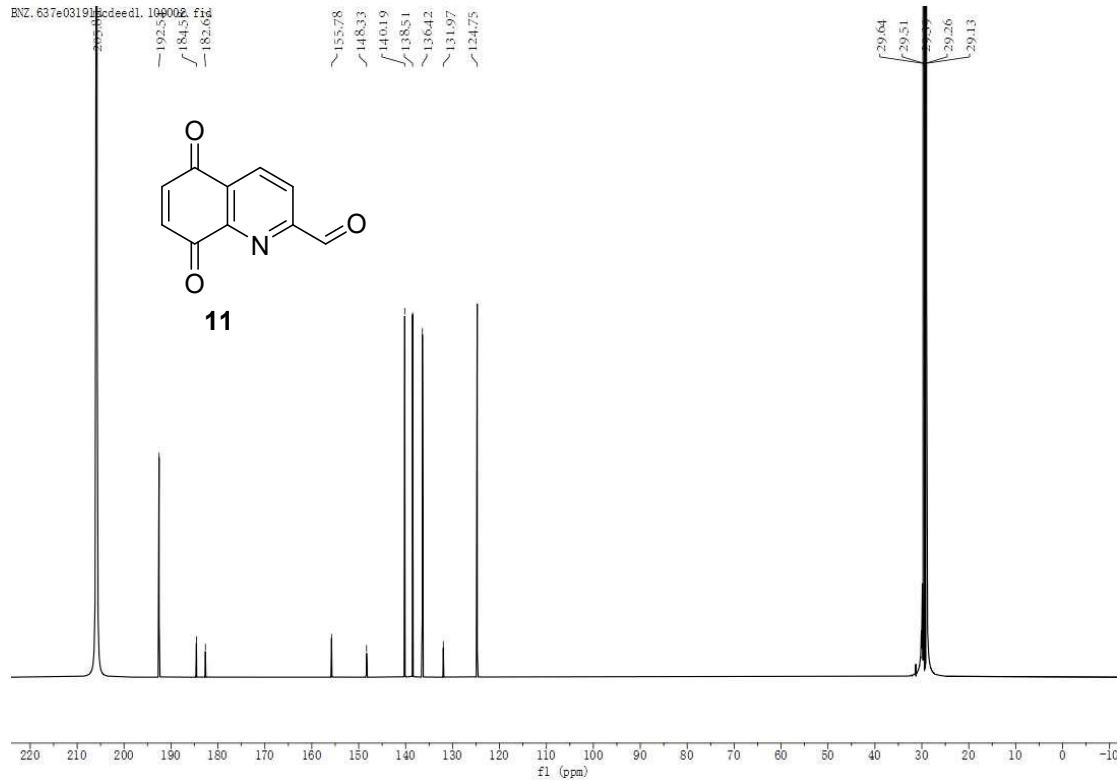

## 12. methyl 5,8-dioxo-5,8-dihydroquinoline-2-carboxylate

Y30181093-0711-123E.1.Fid

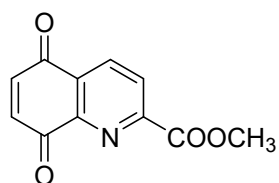

12

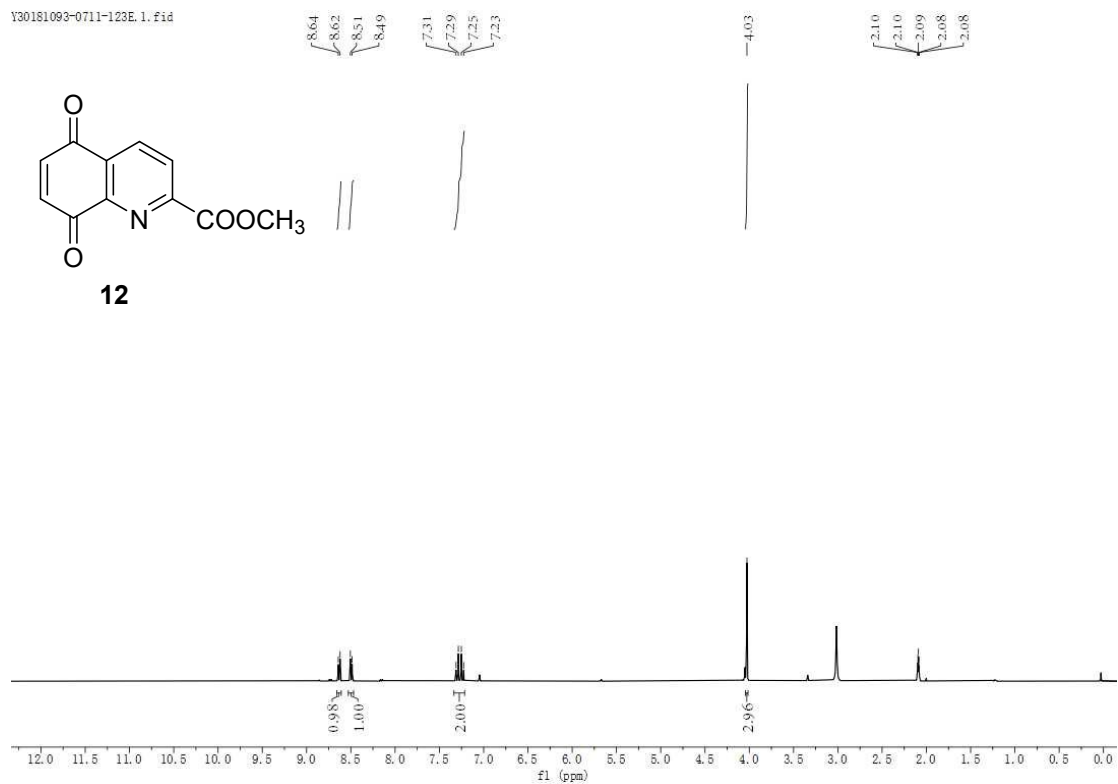

Y30181093-0713-123E.100001.fid

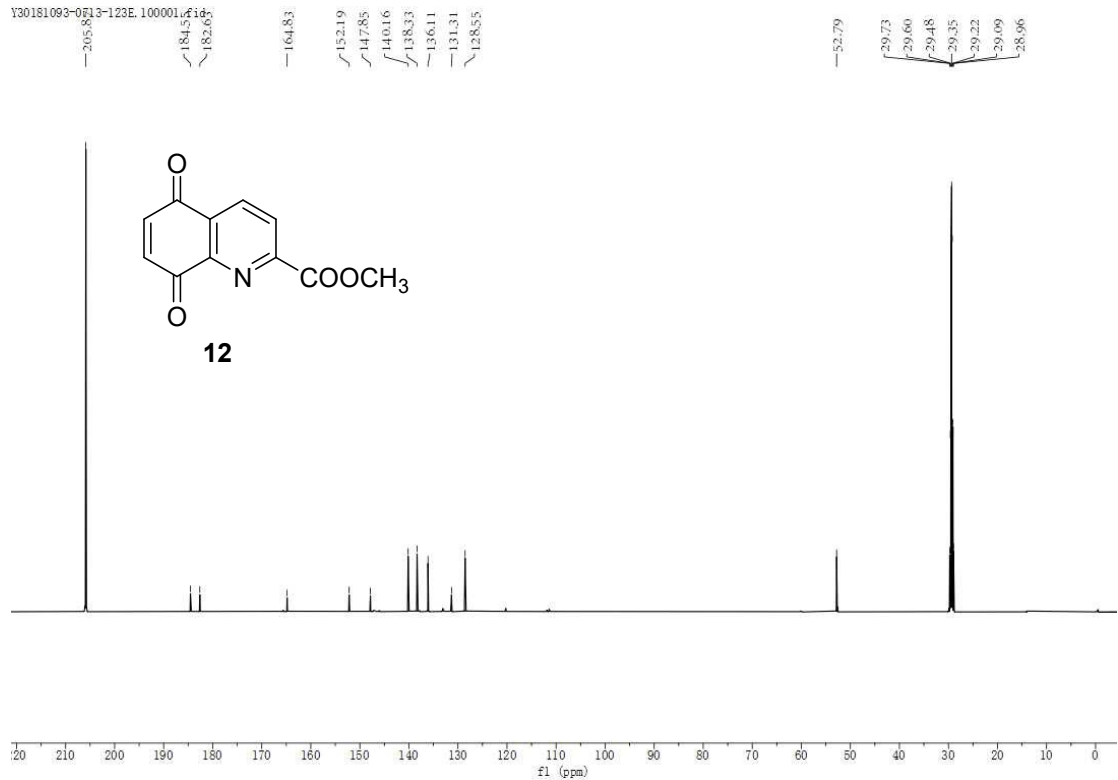

### 13: 5,8-dioxo-5,8-dihydroquinoline-2-carbonitrile

Y30181093-0104-107E.1.fid

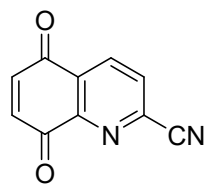

13

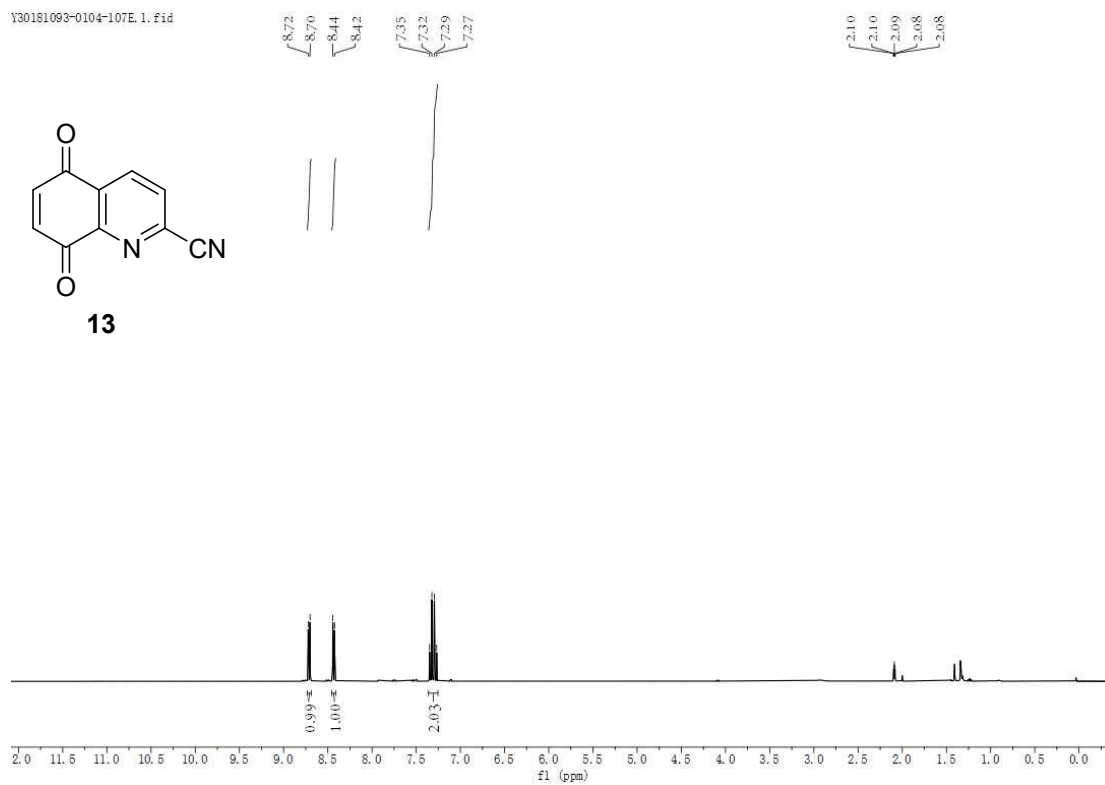

Y30181093-0105-107E.1.fid

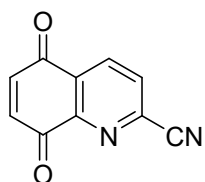

13

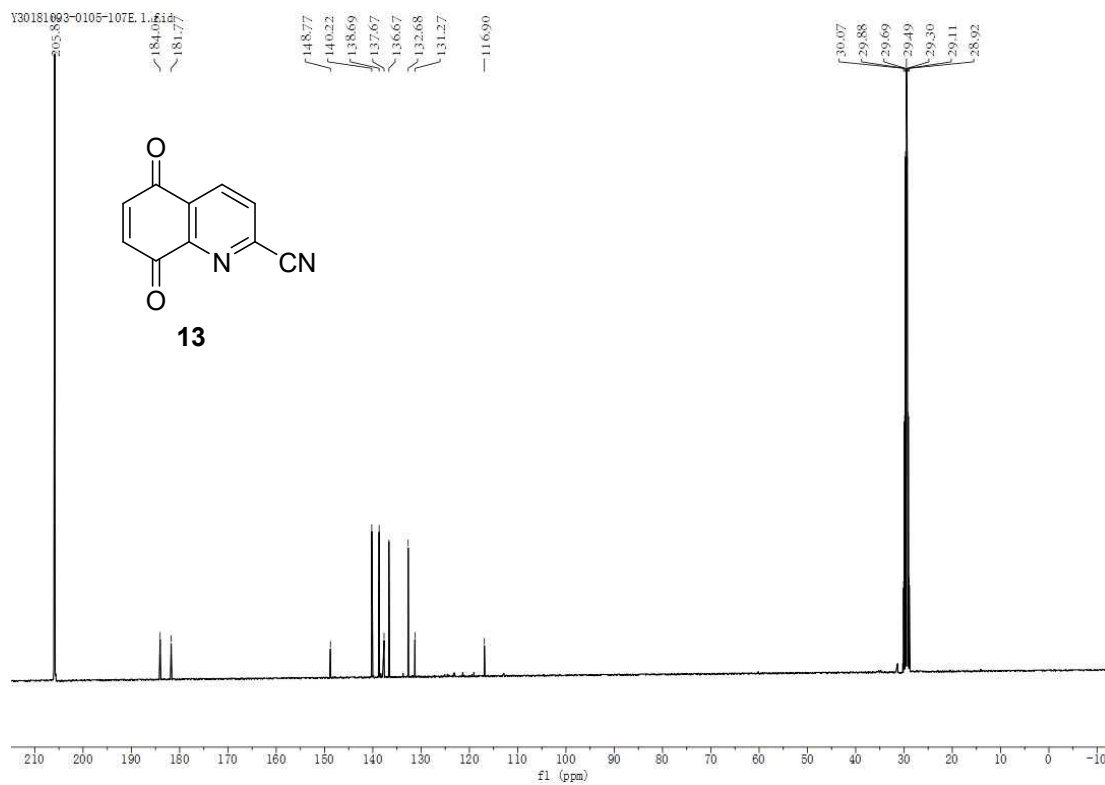

# 16: quinoxaline-5,8-dione

Y30181093-1221-KWL.1.fid

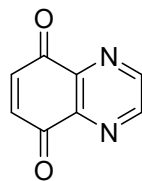

16

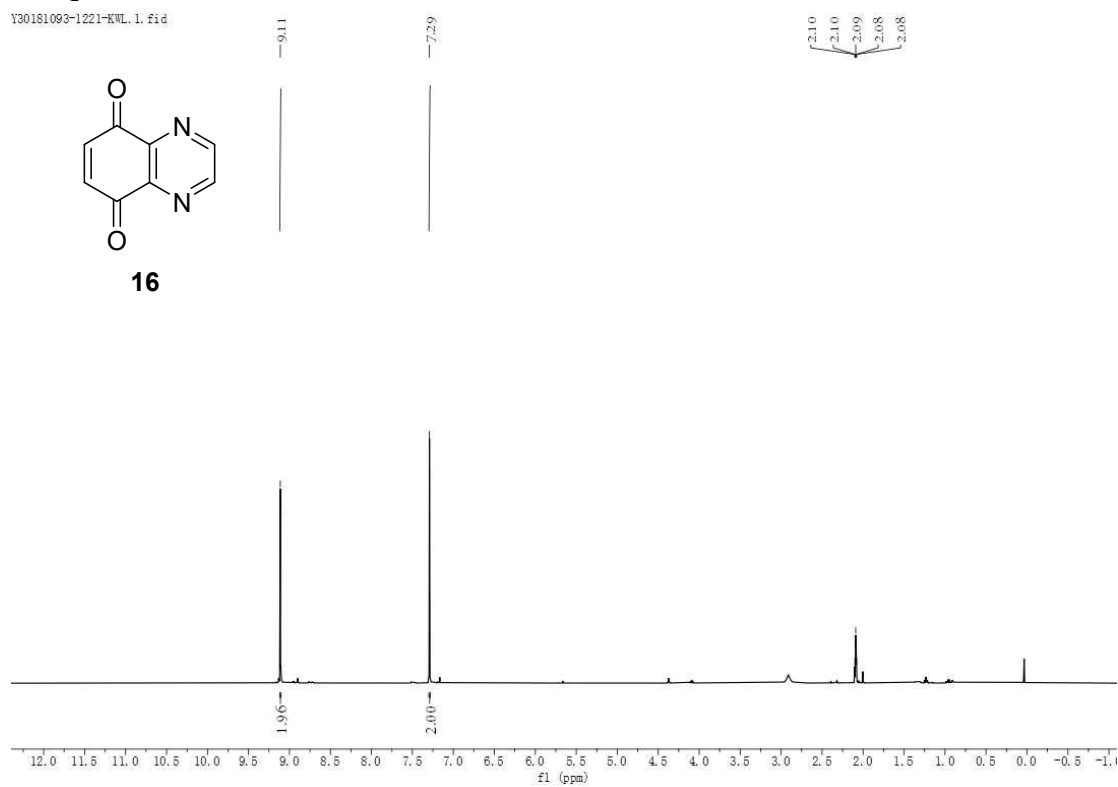

Y30181093-1223-KWL.1.fid

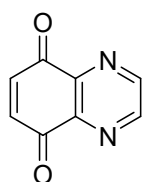

16

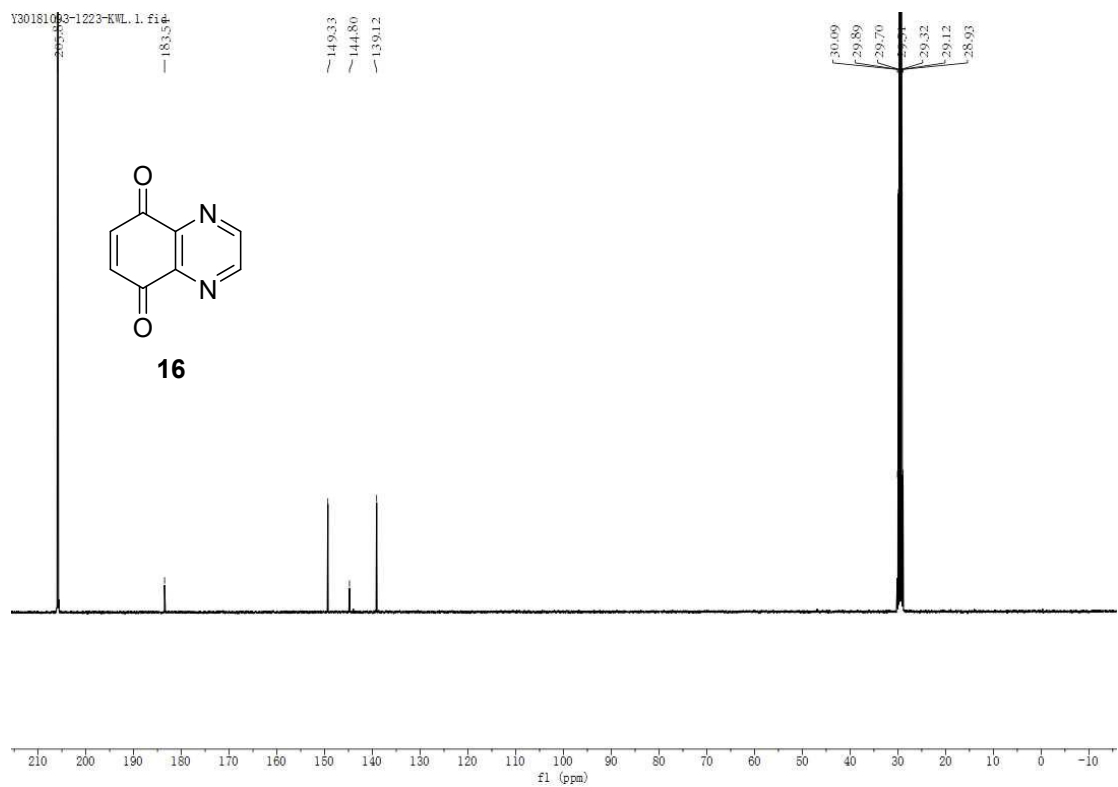

# 17: benzo[d]thiazole-4,7-dione

Y30181093-1102-76C. 1. fid

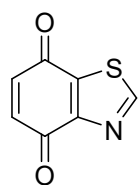

17

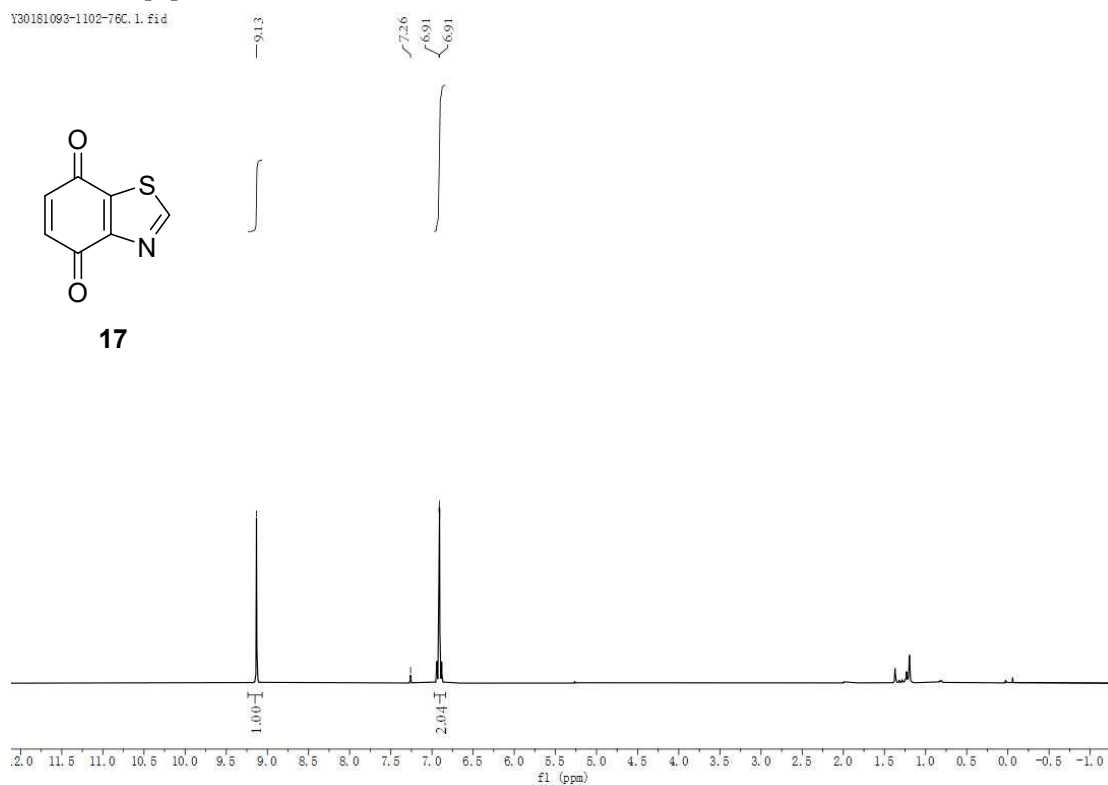

Y30181093-1104-76C-C. 1. fid

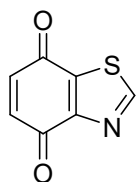

17

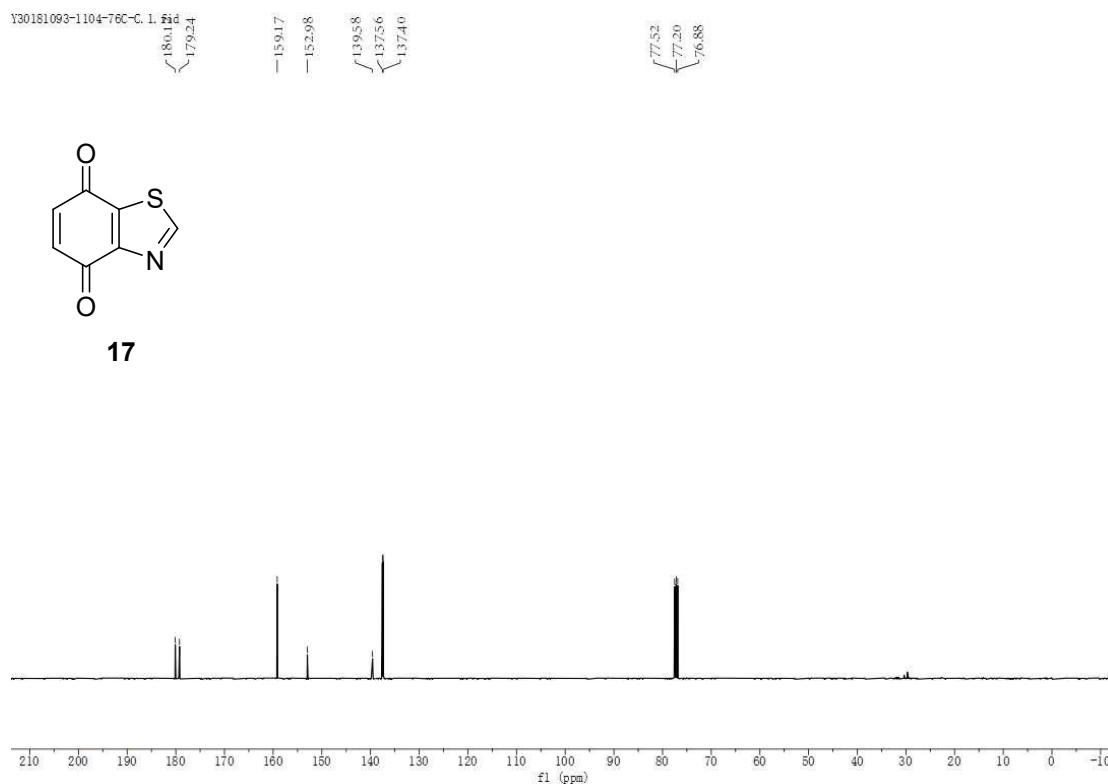

# 18: benzoquinone

Y30181093-0224-116F.1.fid

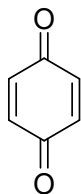

18

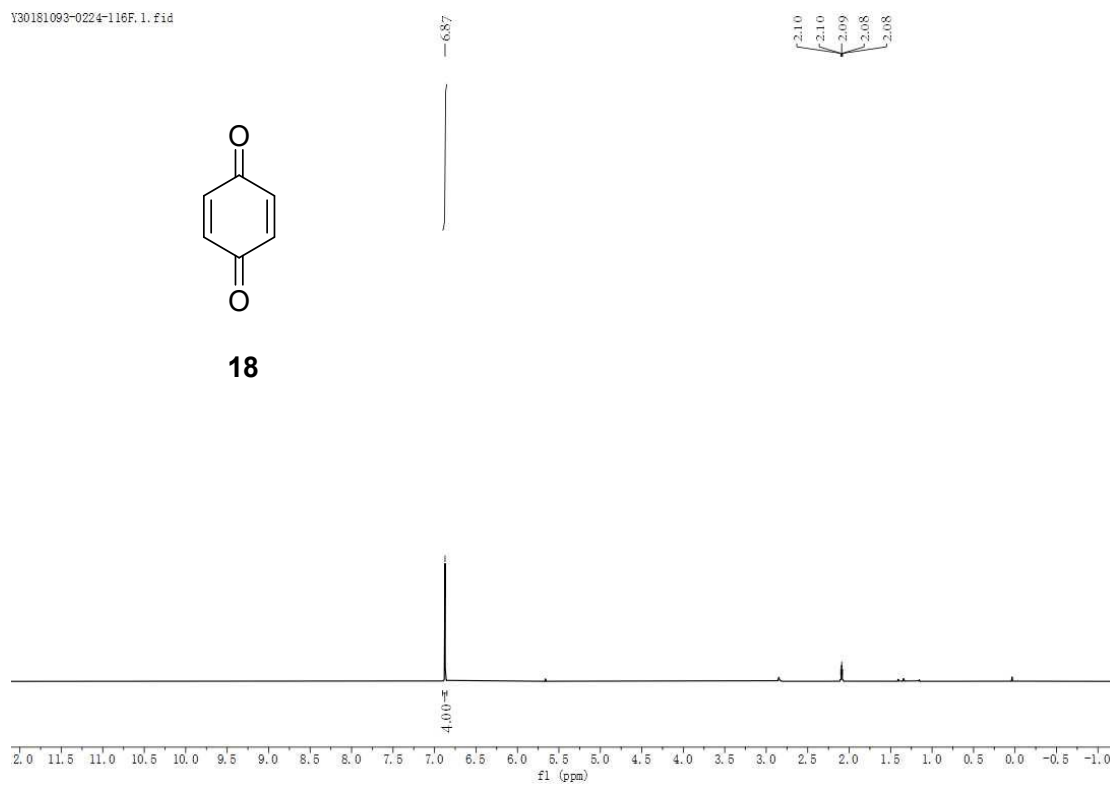

Y30181093-0228-116F.1.fid

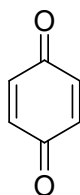

18

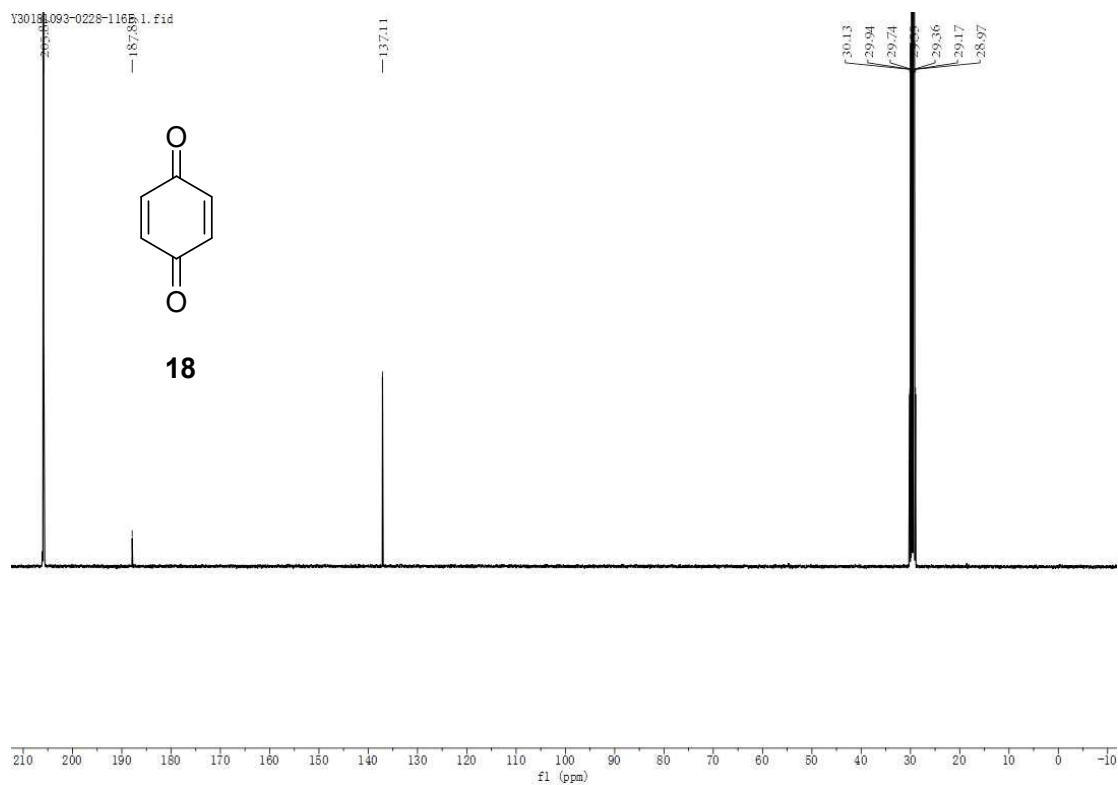

# 19: 2-iodocyclohexa-2,5-diene-1,4-dione

Y30181093-0820-144B.1.fid

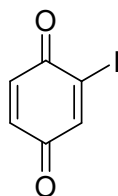

19

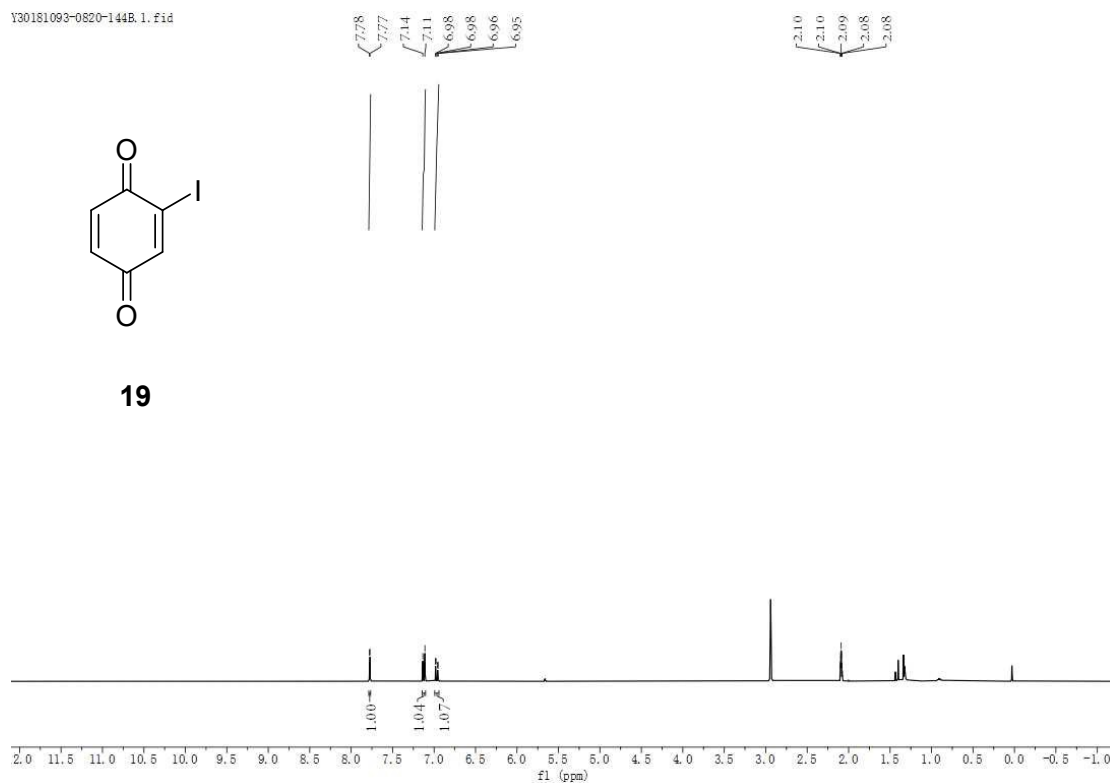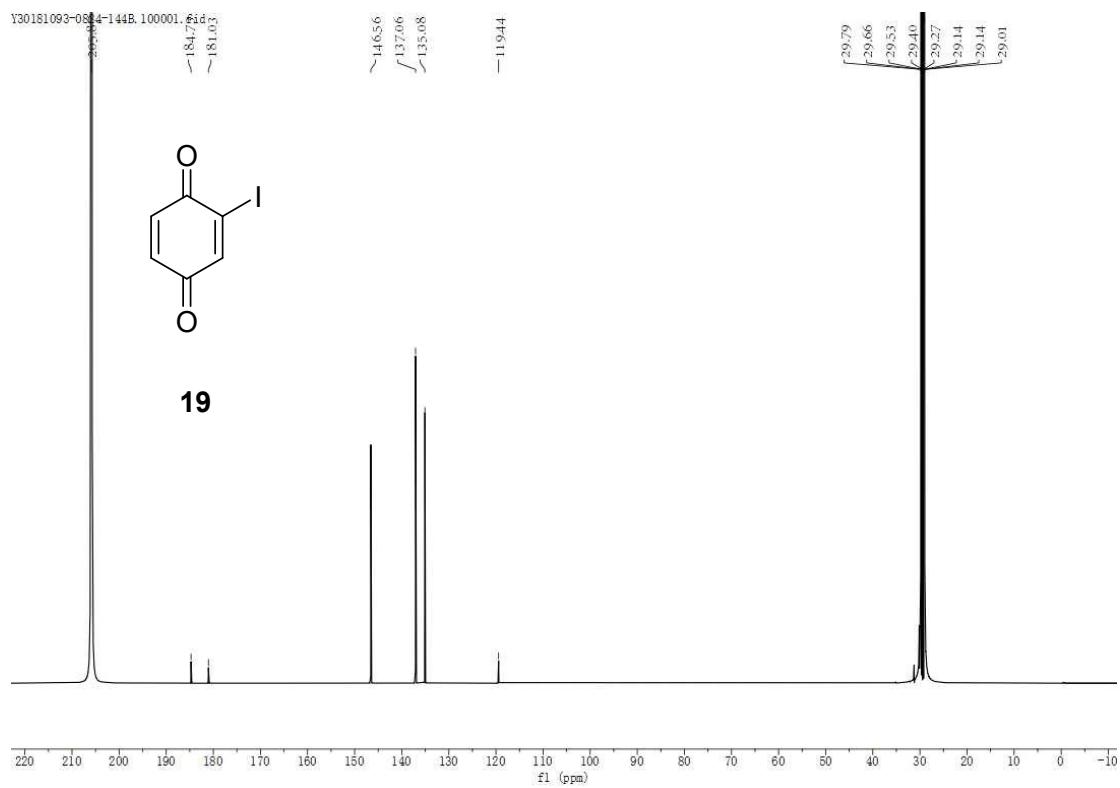

**20: 2-(sec-butyl)cyclohexa-2,5-diene-1,4-dione**

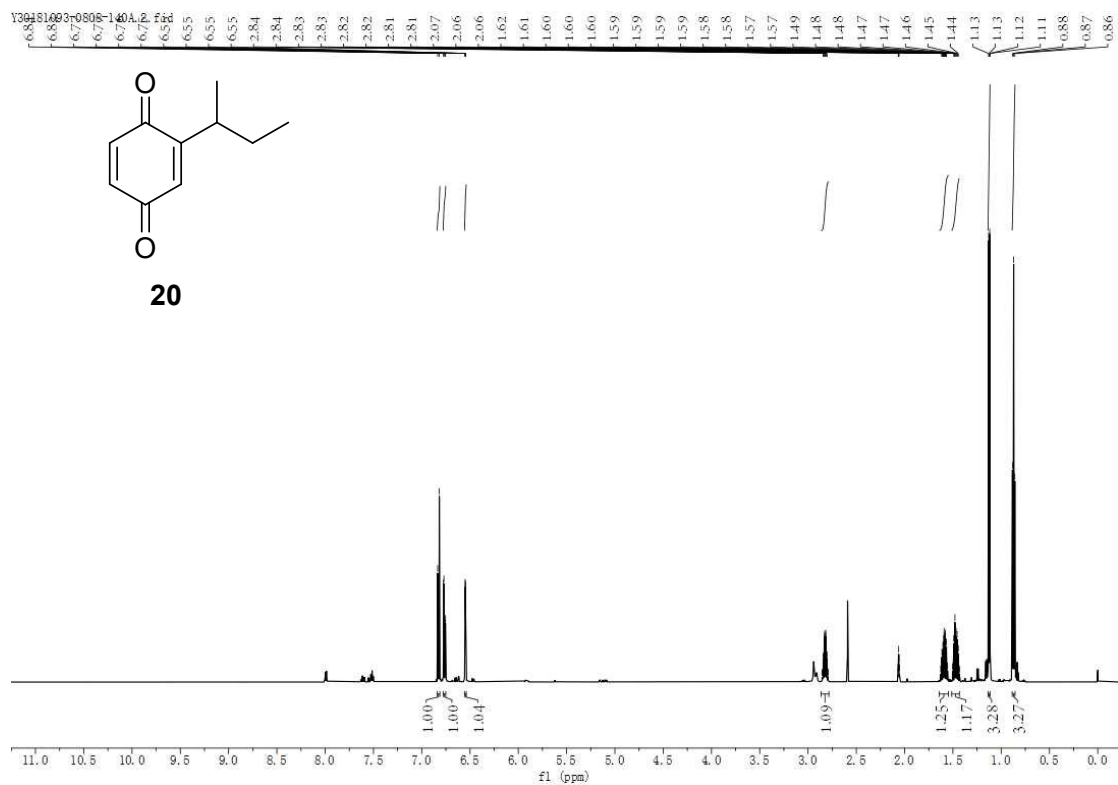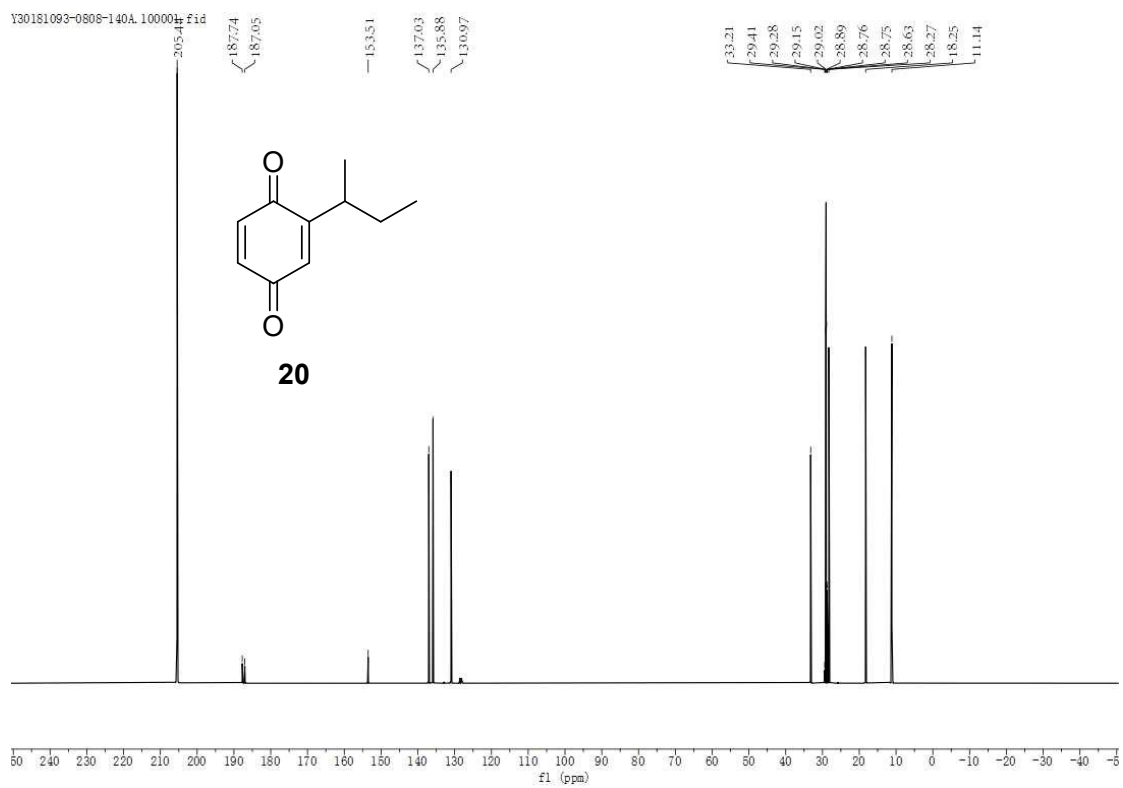



## 21: 2-isopropylcyclohexa-2,5-diene-1,4-dione and acetophenone

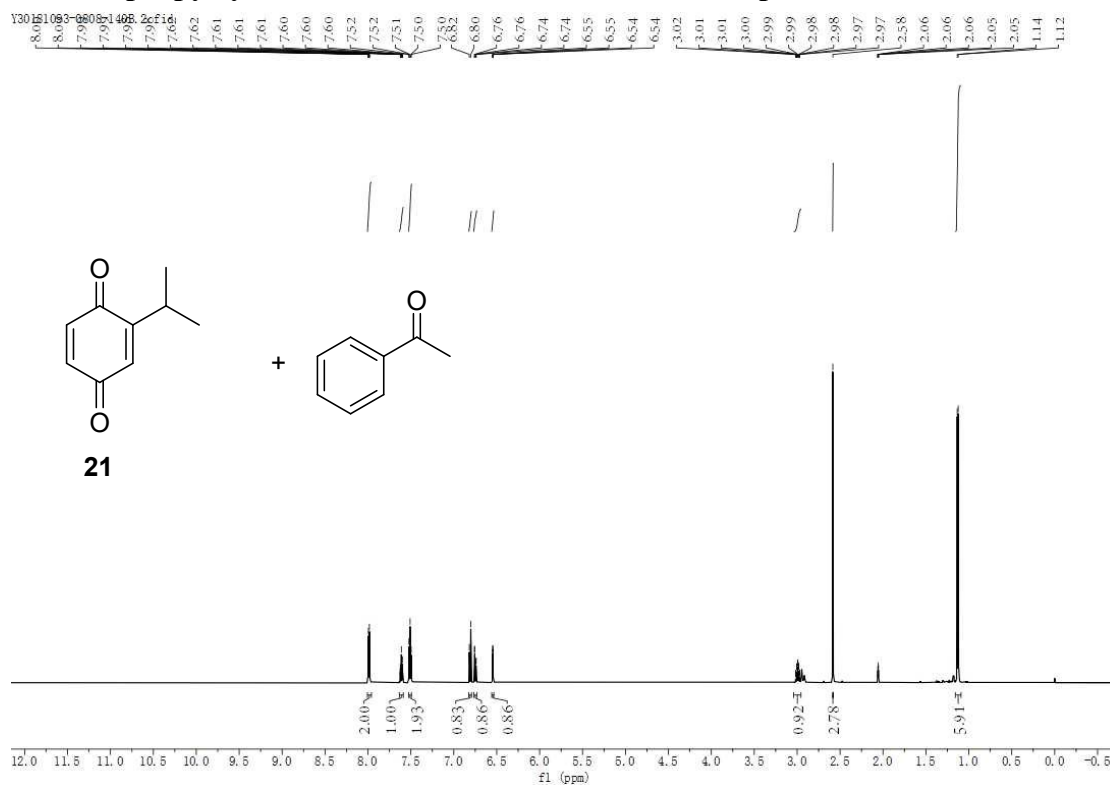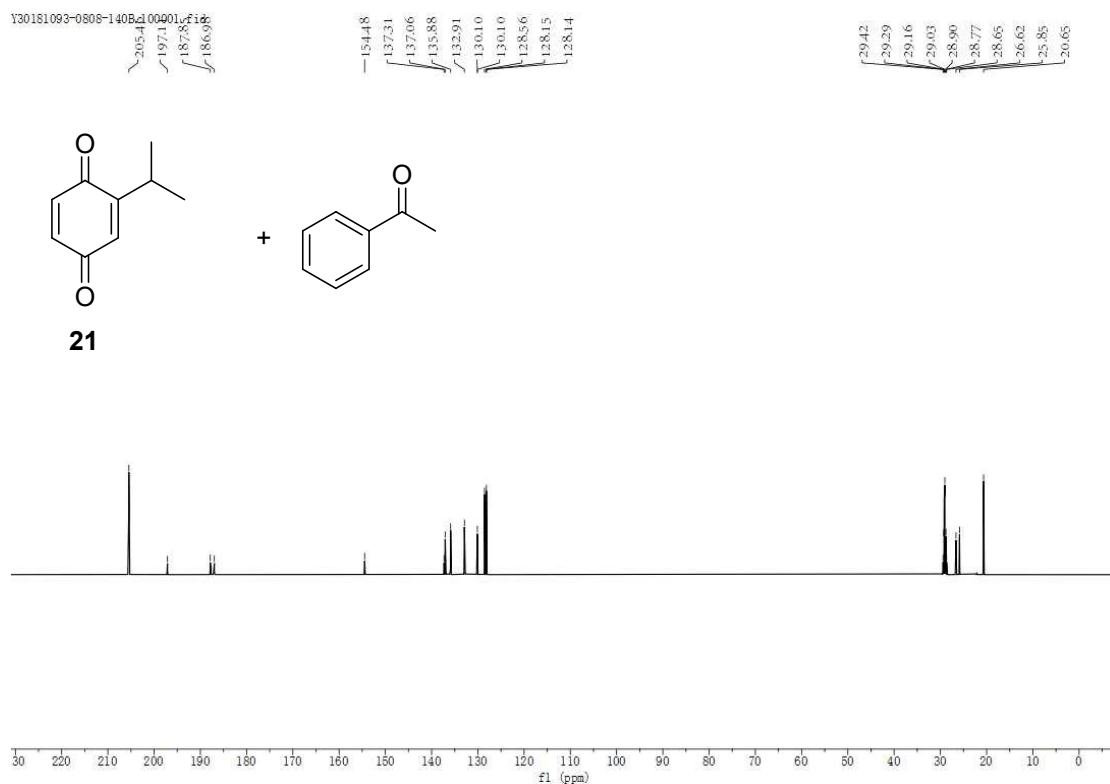

# 22: 2-(tert-butyl)cyclohexa-2,5-diene-1,4-dione

Y30181093-0121-115AS.1.fid

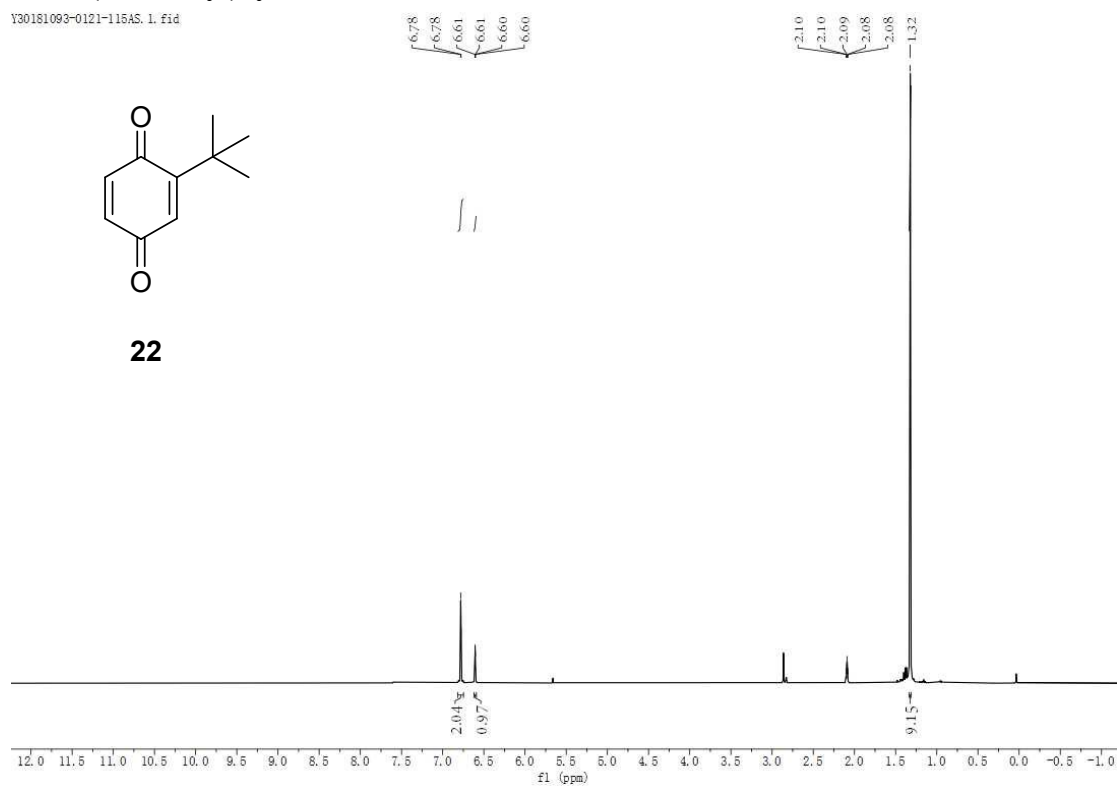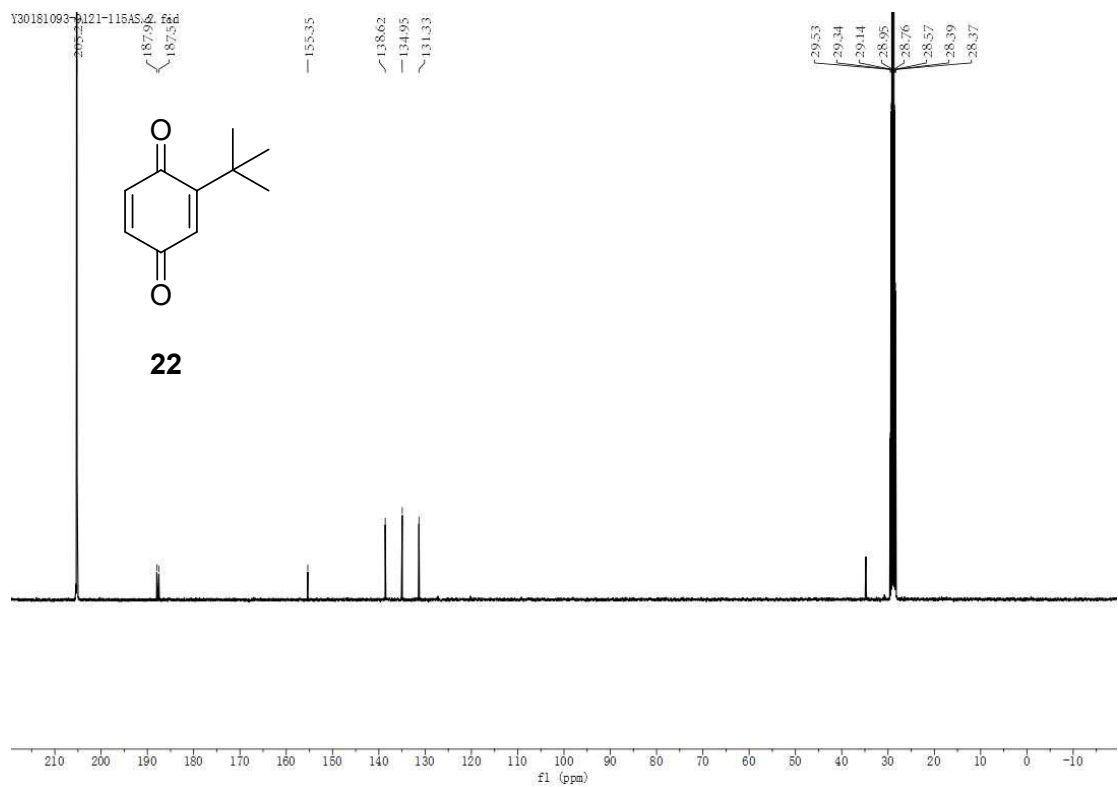

# 23: 2-methylcyclohexa-2,5-diene-1,4-dione

Y30181093-0727-131G.1.fid

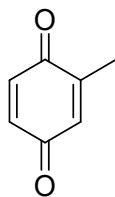

23

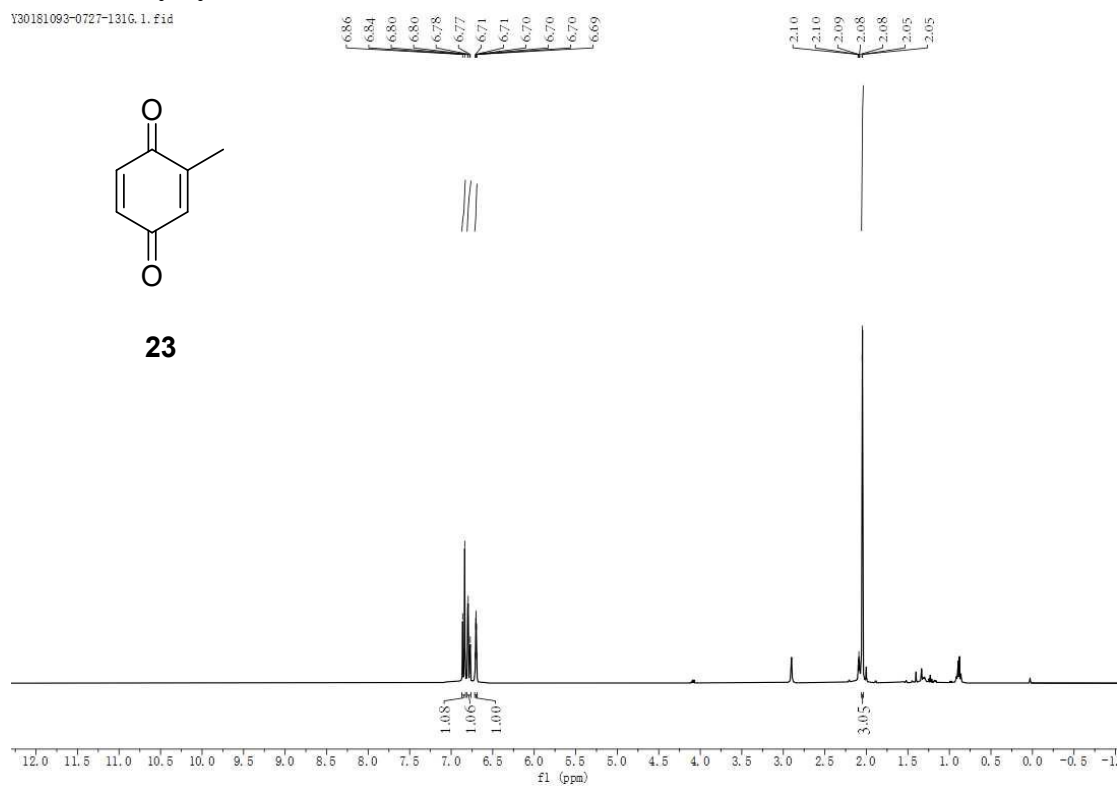

Y30181093-0727-131G.100004.fid

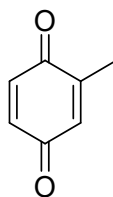

23

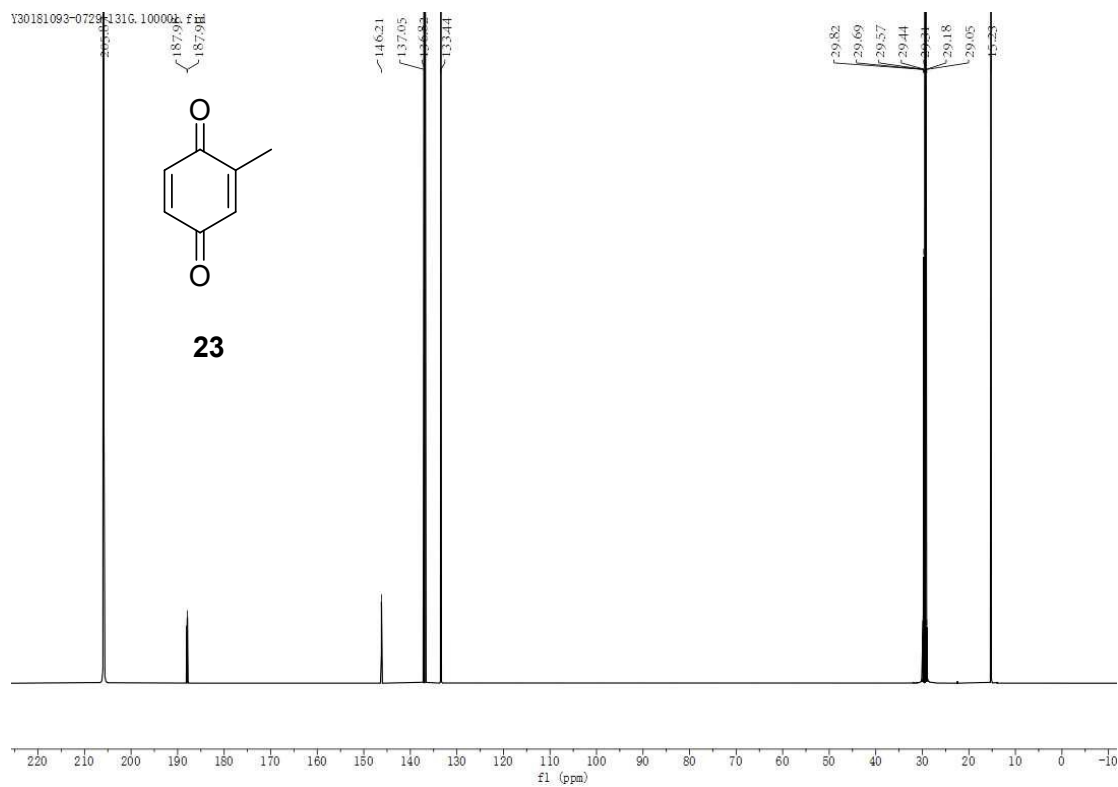

# 24: 2,6-dimethylcyclohexa-2,5-diene-1,4-dione

BNZ.637b751113d32f50.1.fid

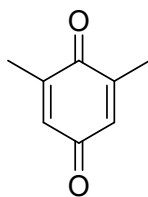

24

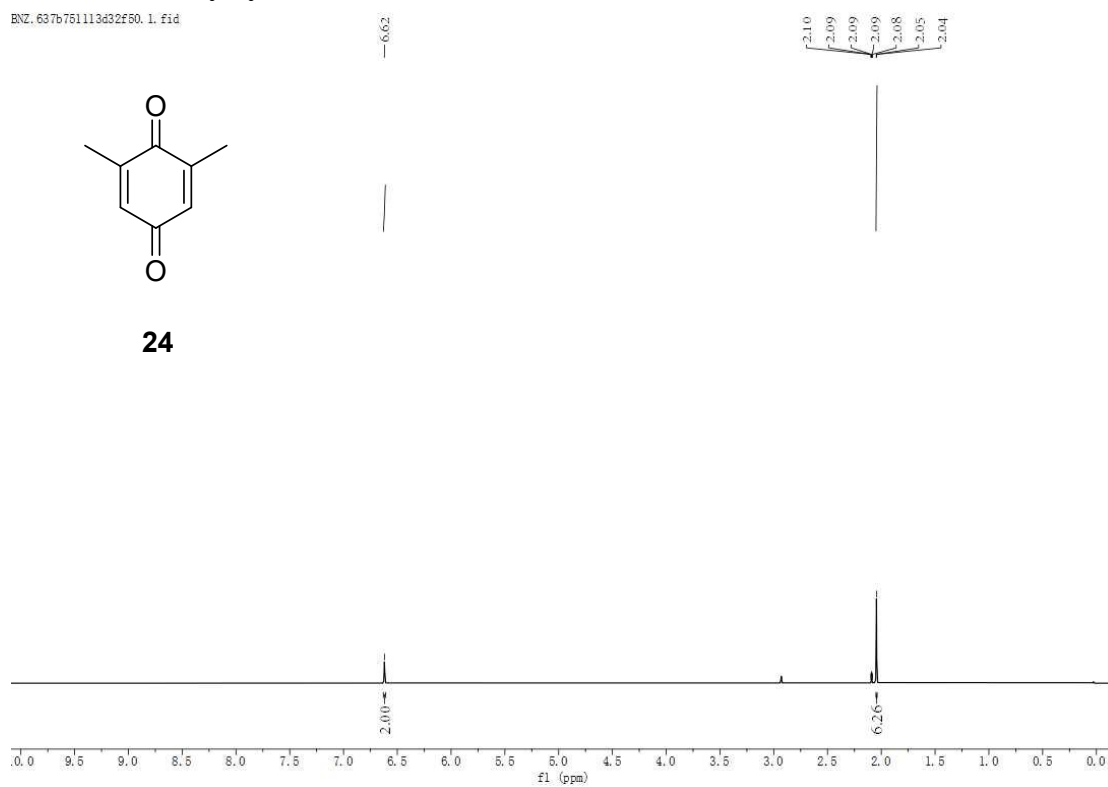

BNZ.637b751113d35ee4.10600b.fid

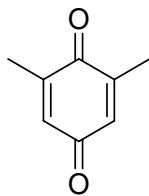

24

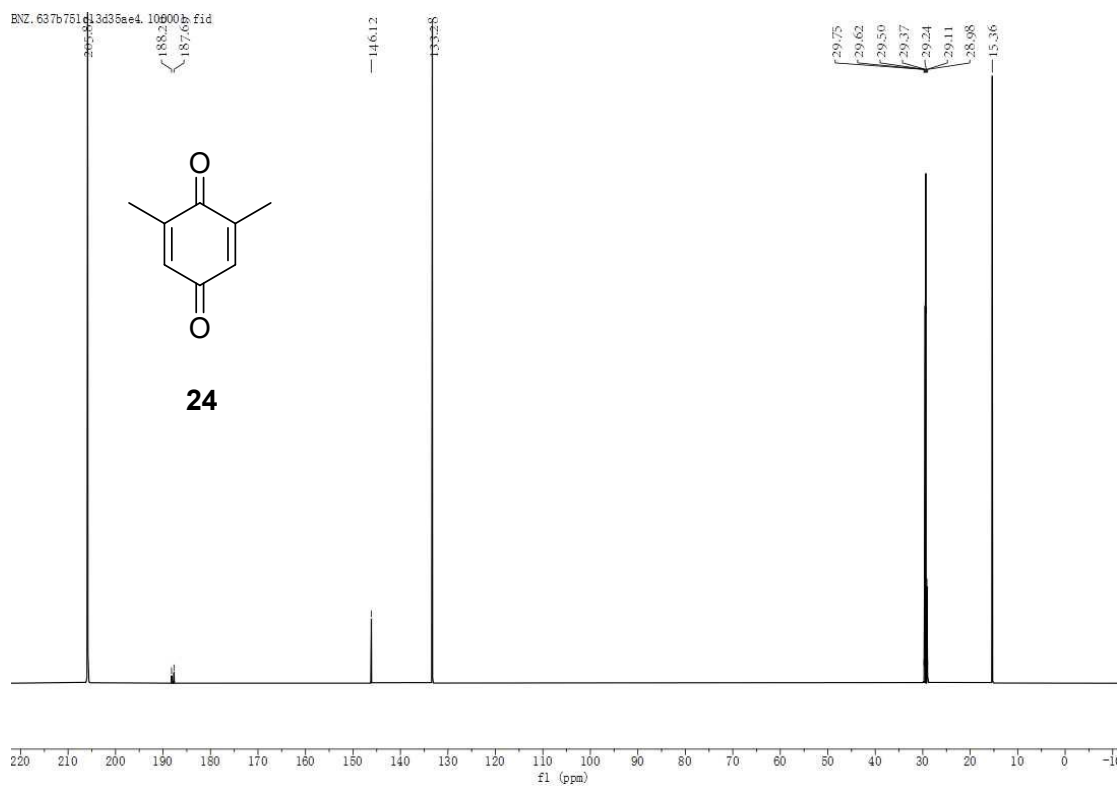

# 25: 4'-methoxy-[1,1'-biphenyl]-2,5-dione

Y30181093-0113-3A. 1.fid

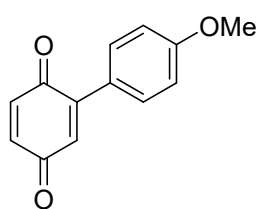

25

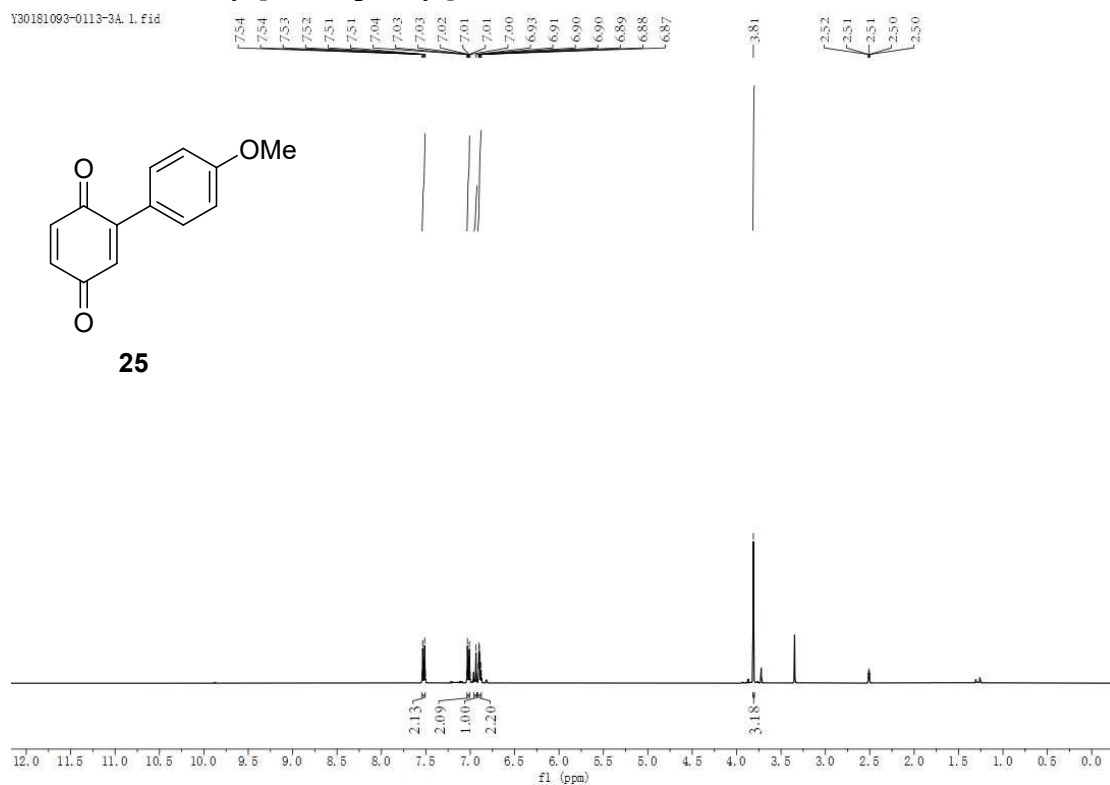

Y30181093-0113-3A. 1.fid

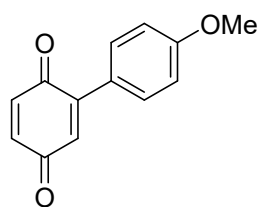

25

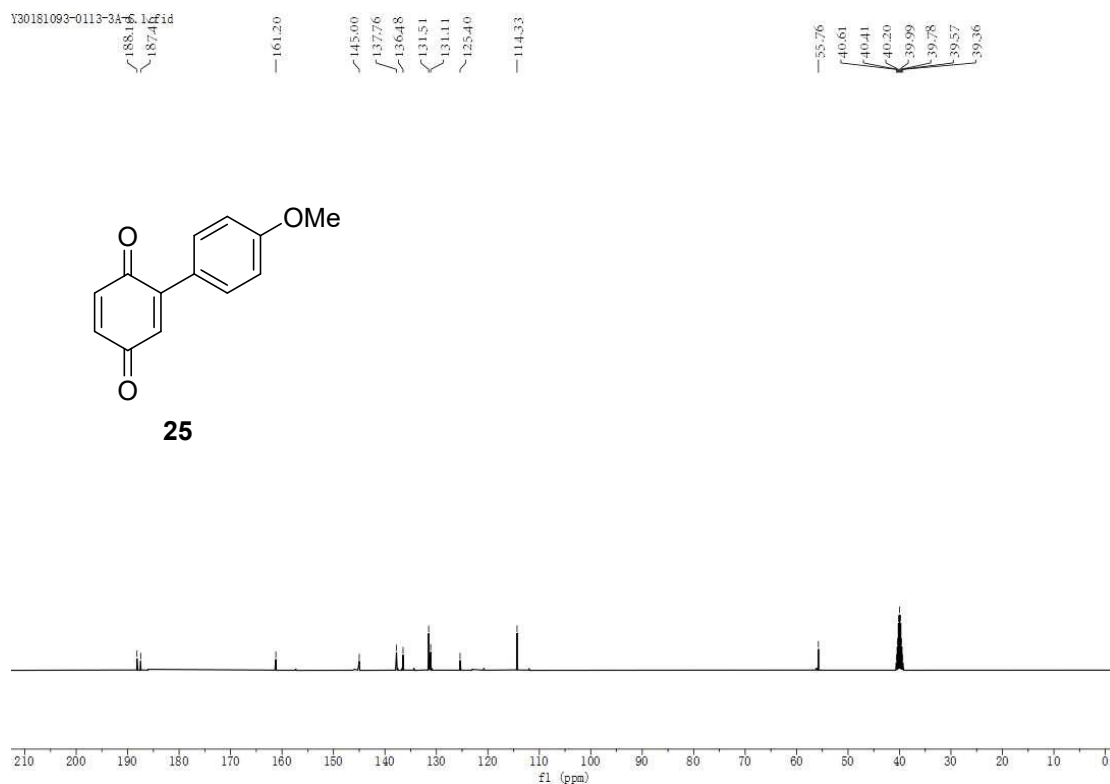

# 28: naphthalene-1,4-dione

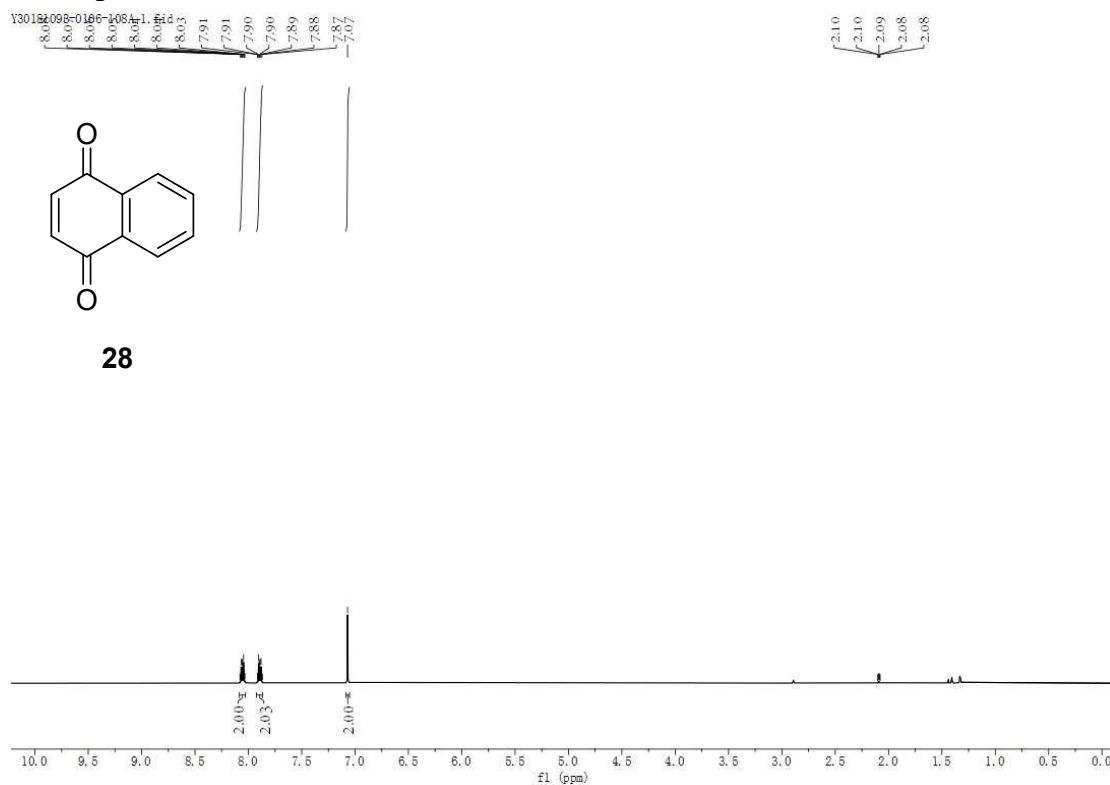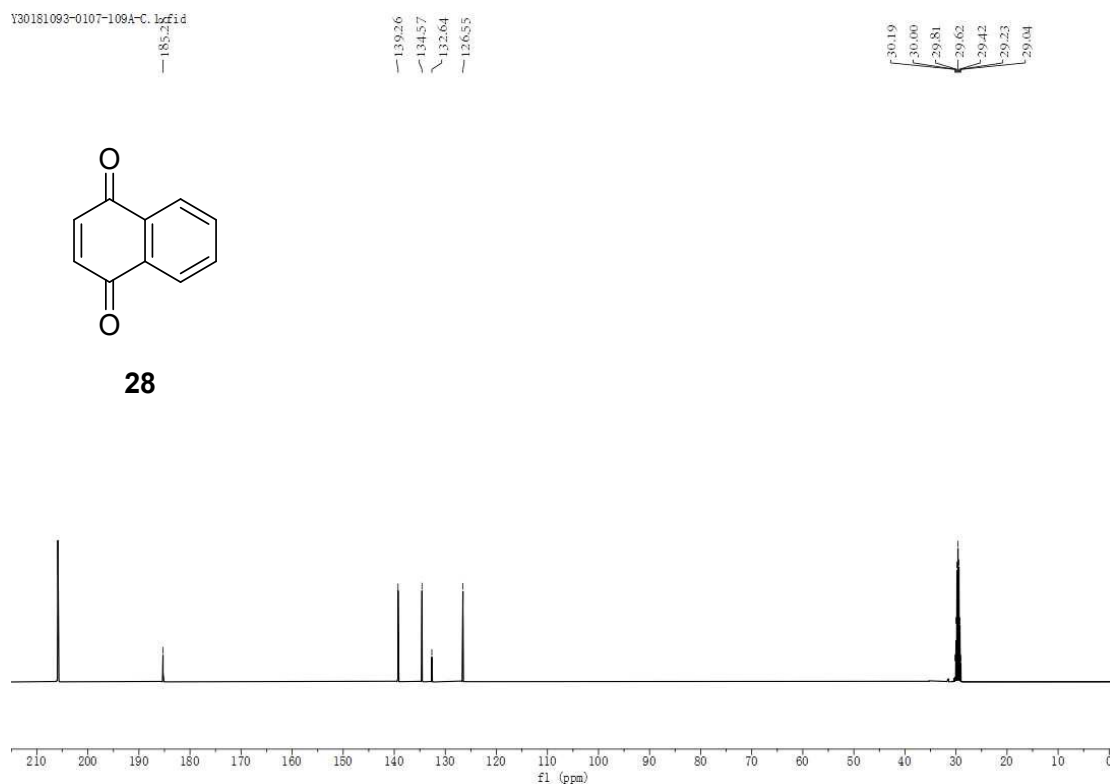

# 29: 5,8-dioxo-5,8-dihydronaphthalene-2-carbaldehyde

Y30181093-1221-98C.1.f1d

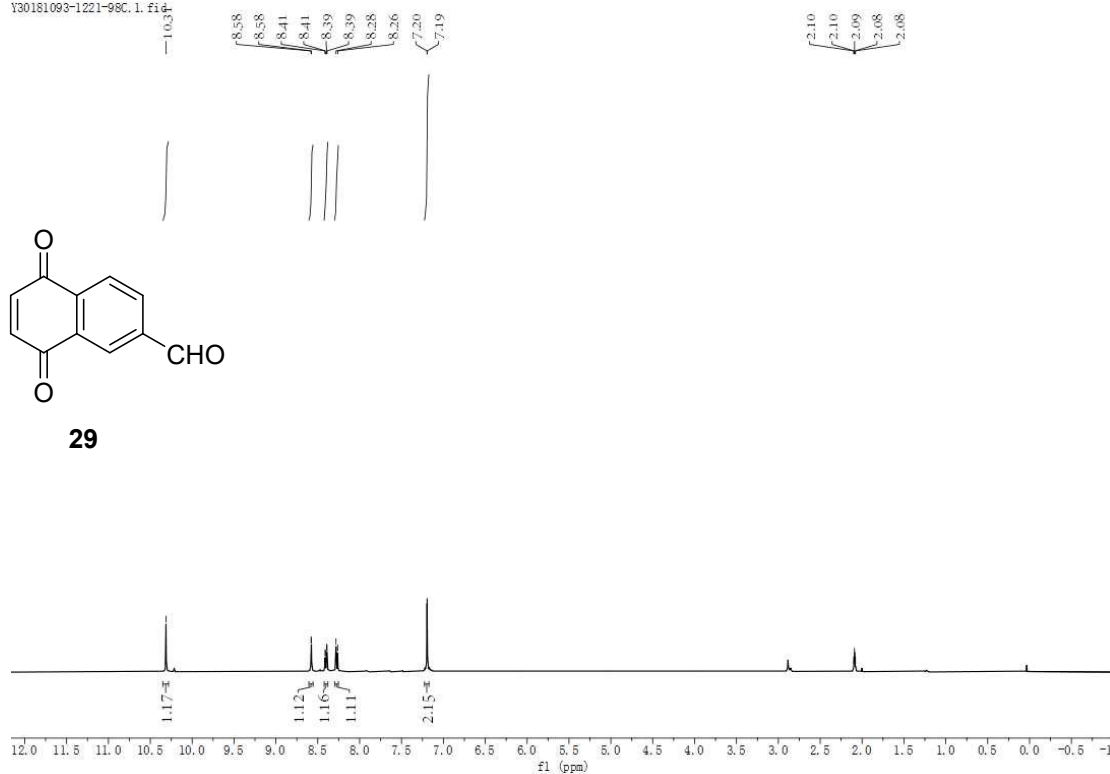

Y30181093-1223-98C.2.f1d

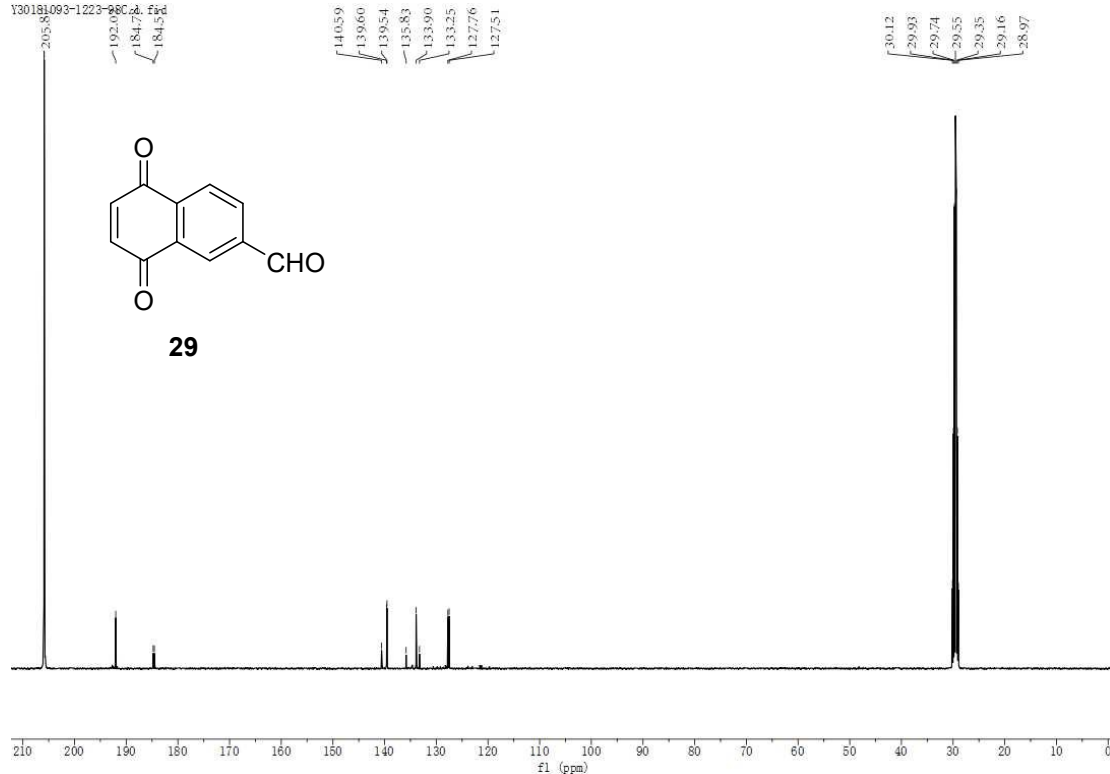

### 30: 6-acetylnaphthalene-1,4-dione

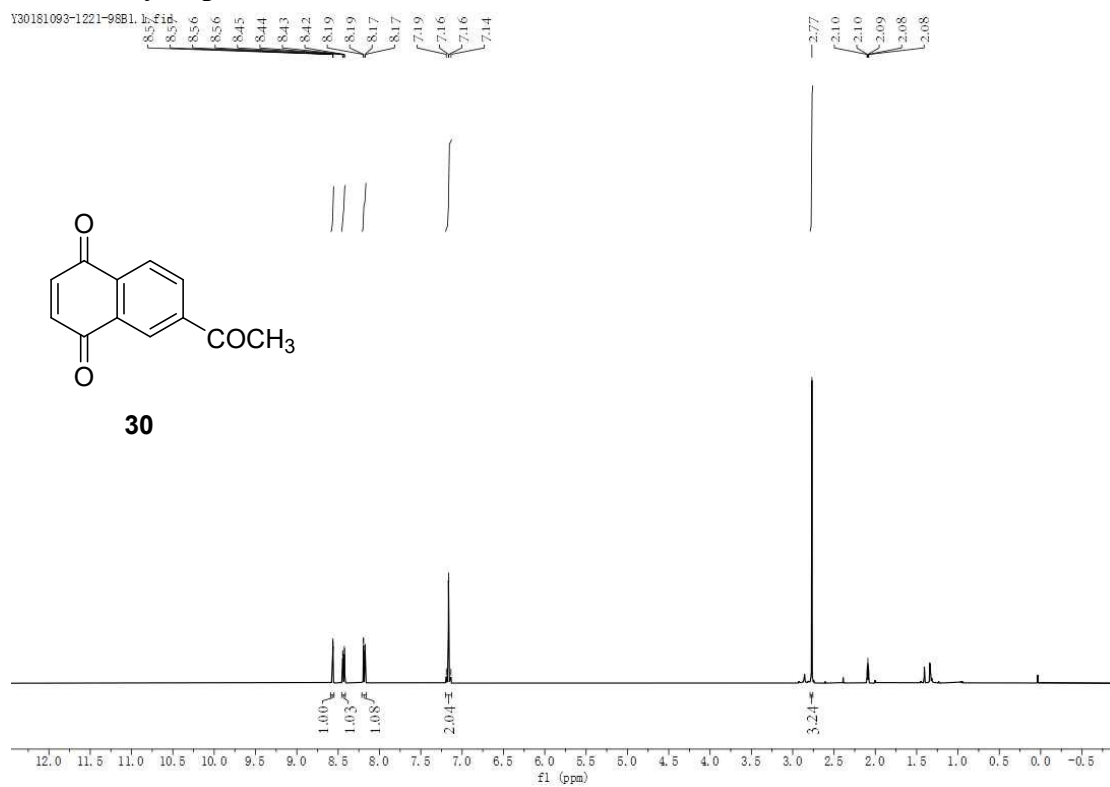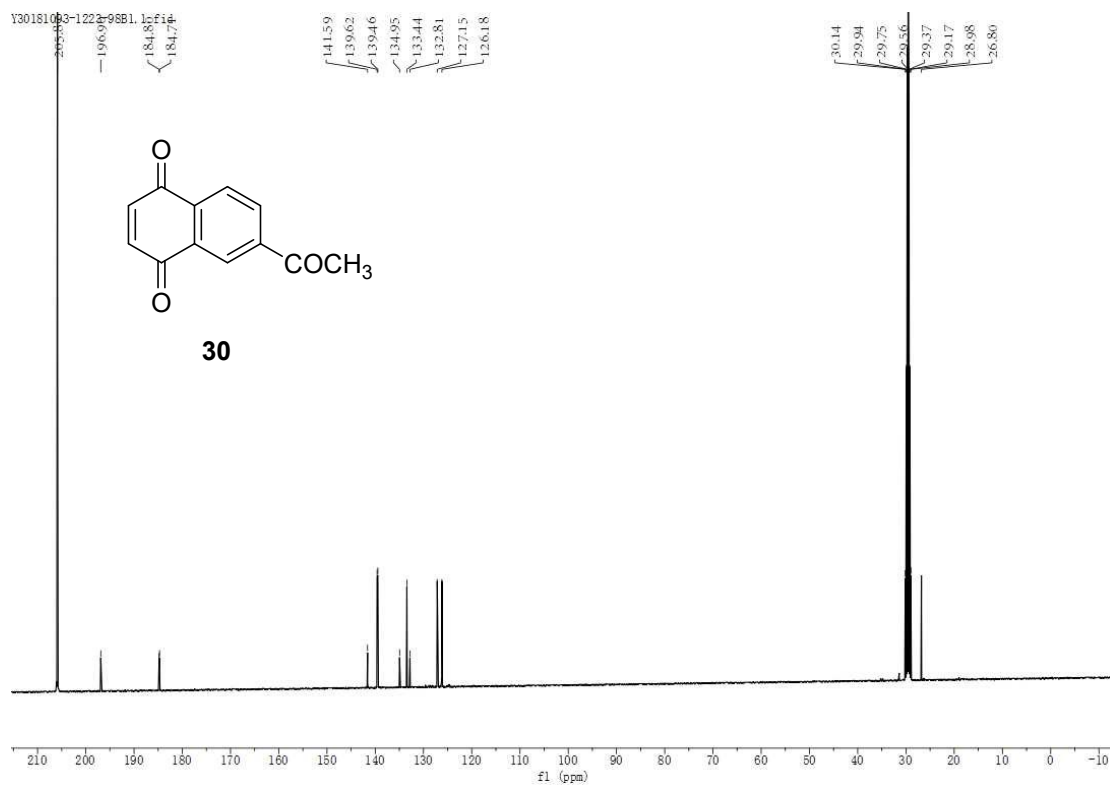



### 31: 5,8-dioxo-5,8-dihydronaphthalen-2-yl trifluoromethanesulfonate

Y30181093-1207-87E.1.fid

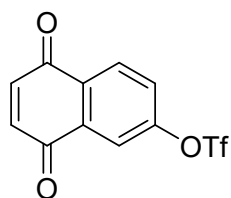

**31**

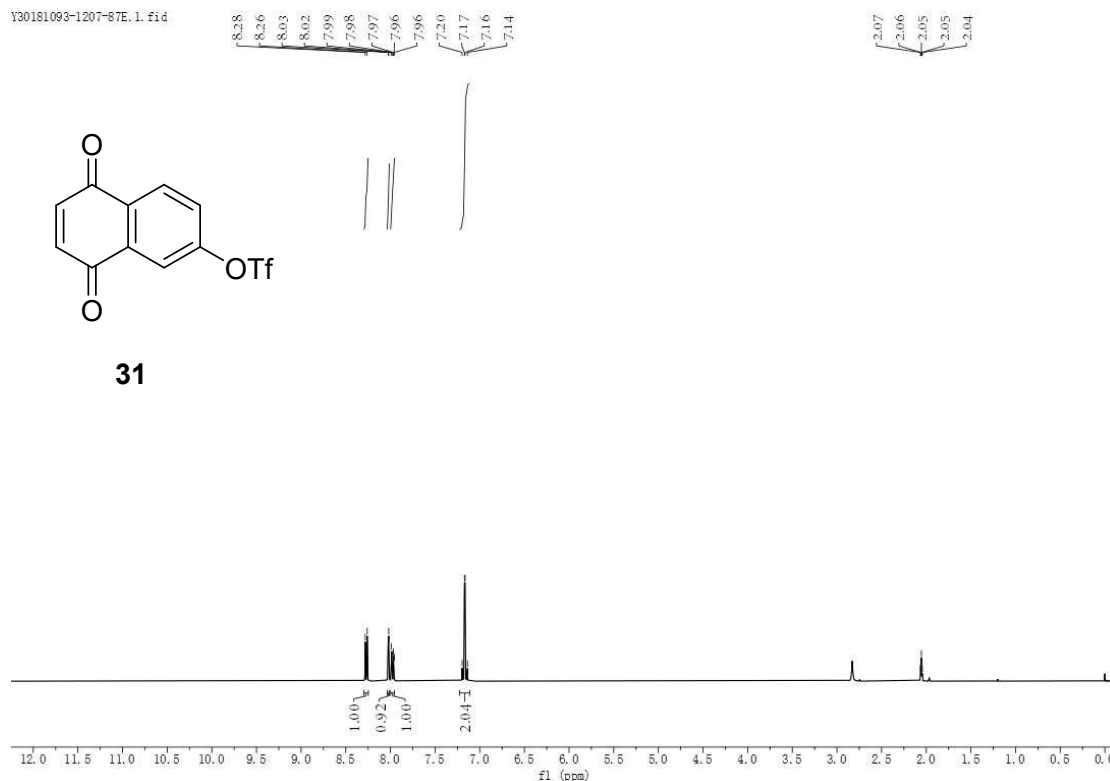

Y30181093-1208-87E.1.fid

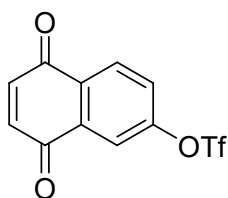

**31**

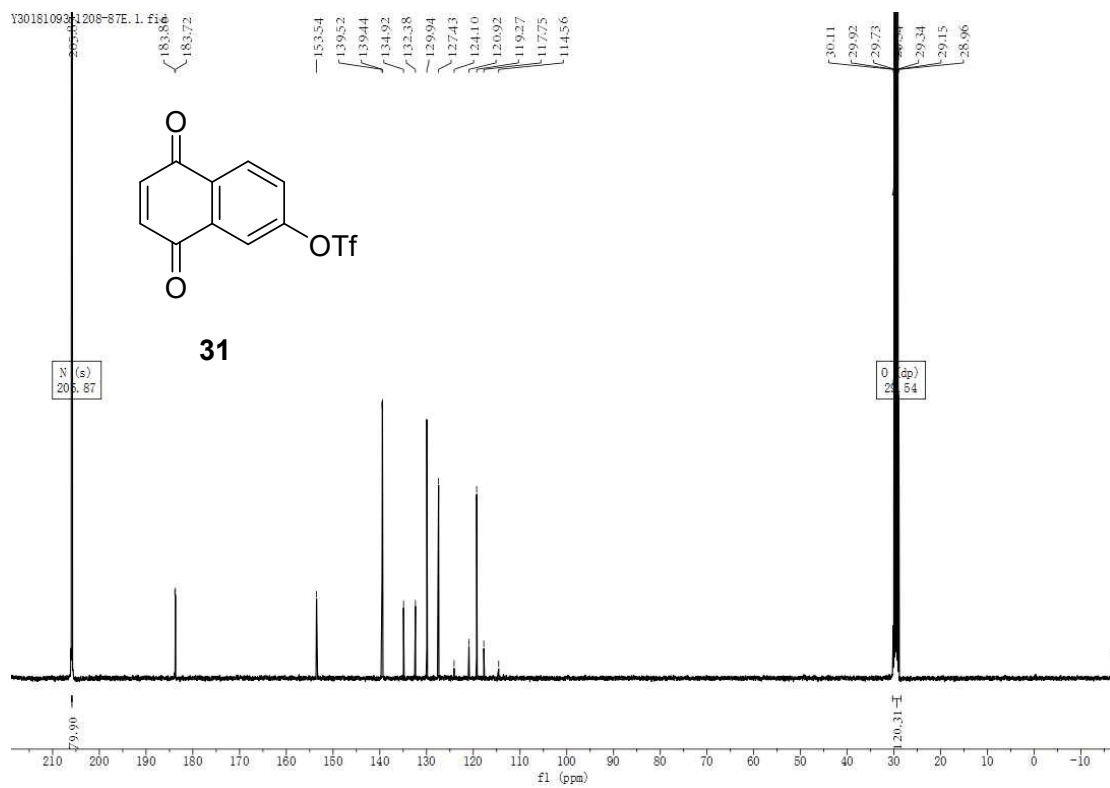

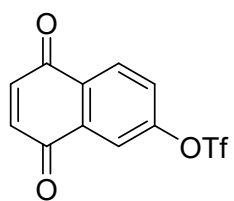

**31**

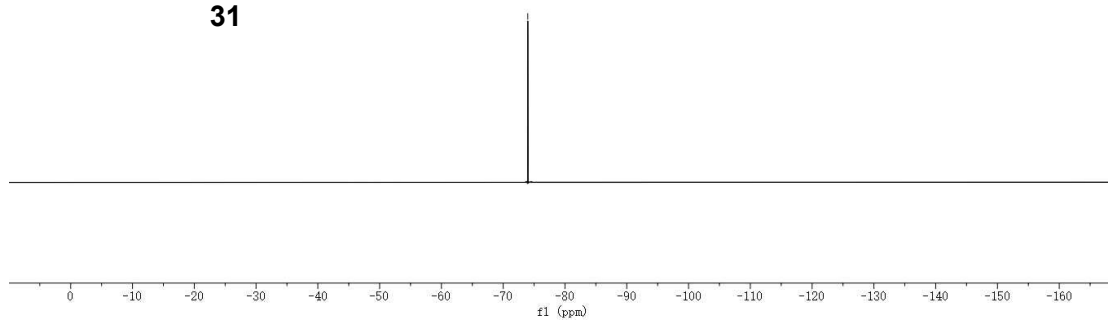

# 32: anthracene-9,10-dione

Y30181093-0112-110B.1.fid

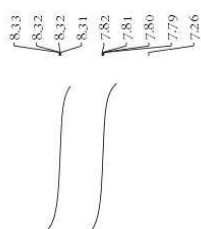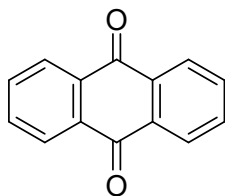

32

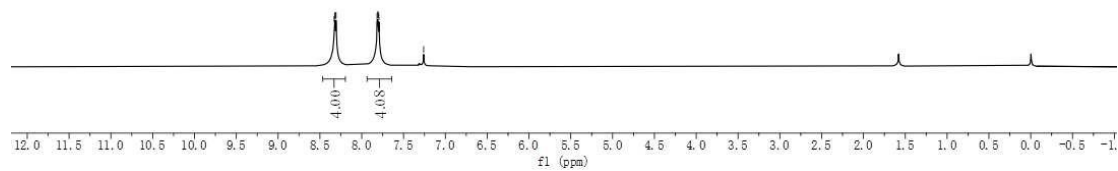

Y30181093-0114-110B.1.fid

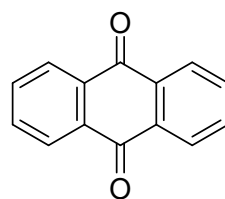

32

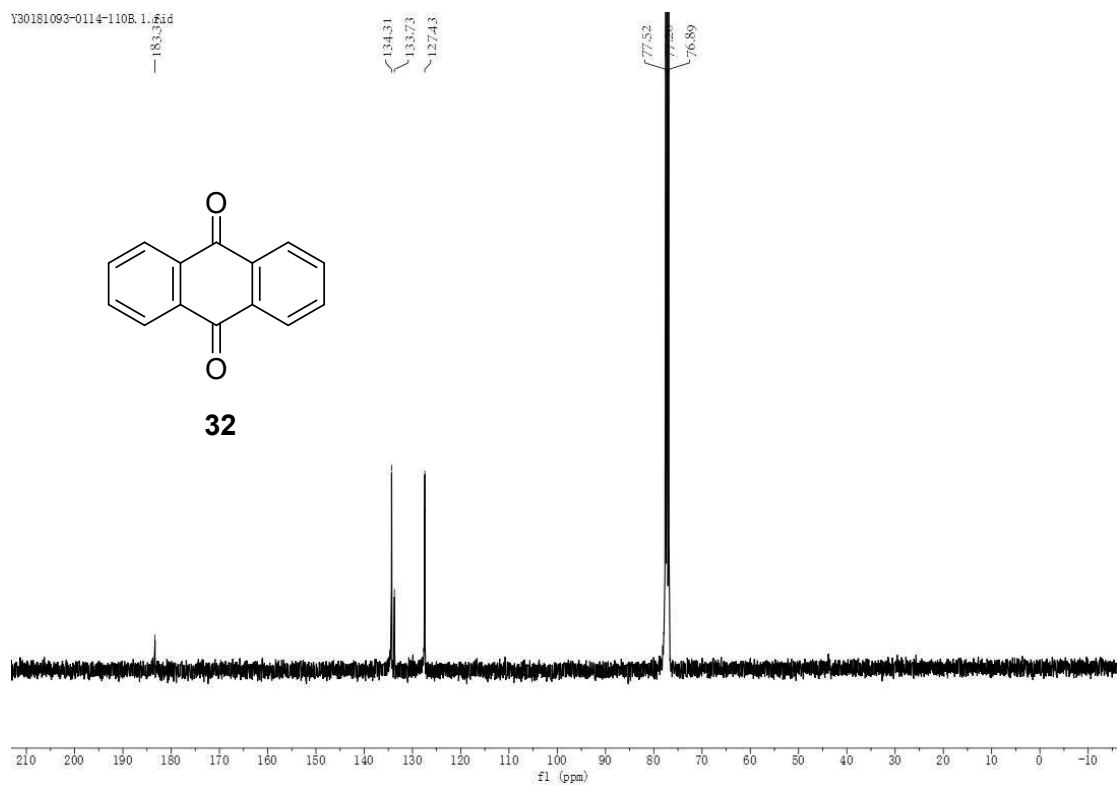

### 33: phenanthrene-9,10-dione

Y30181093-0706-123C.1.fid

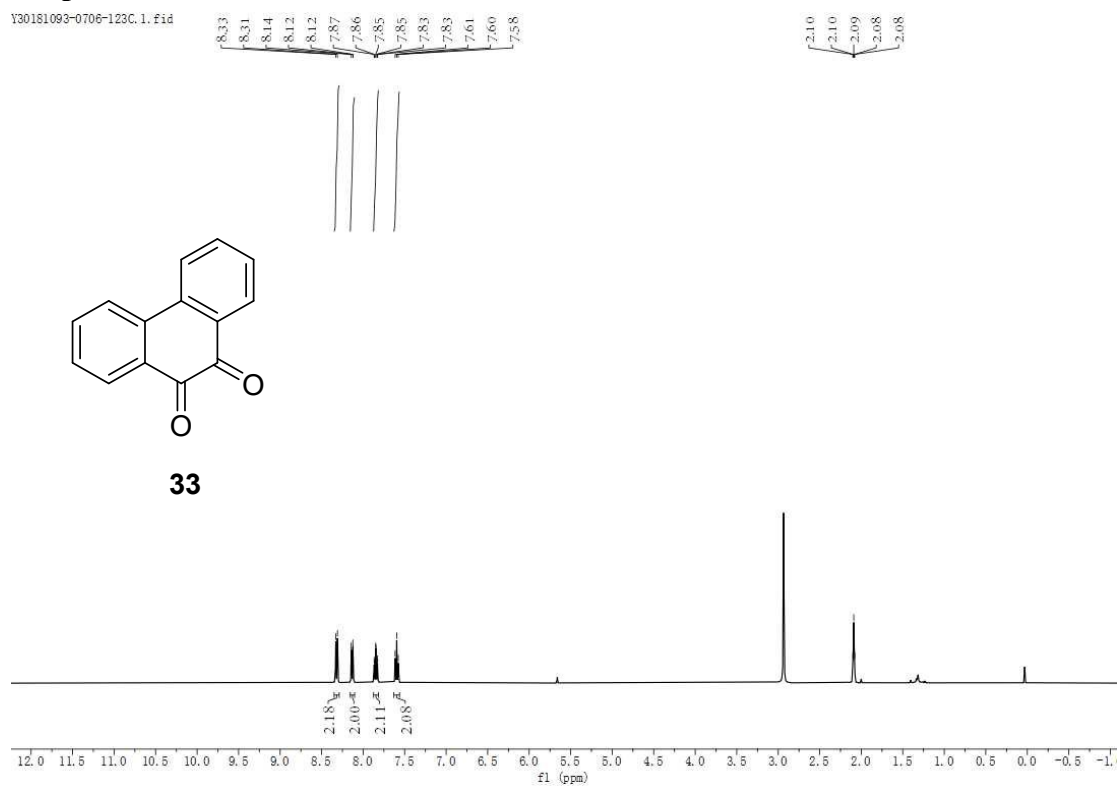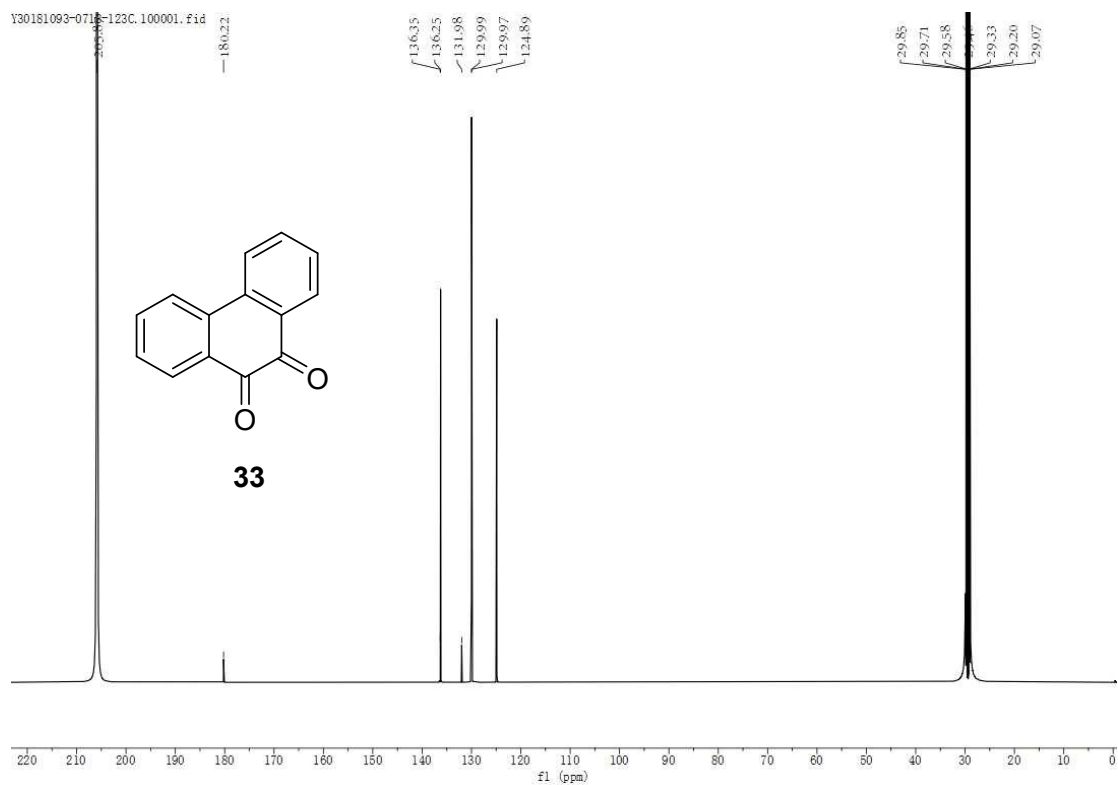

**35: 6-((2-acetylphenyl)amino)-2-methylquinoline-5,8-dione**

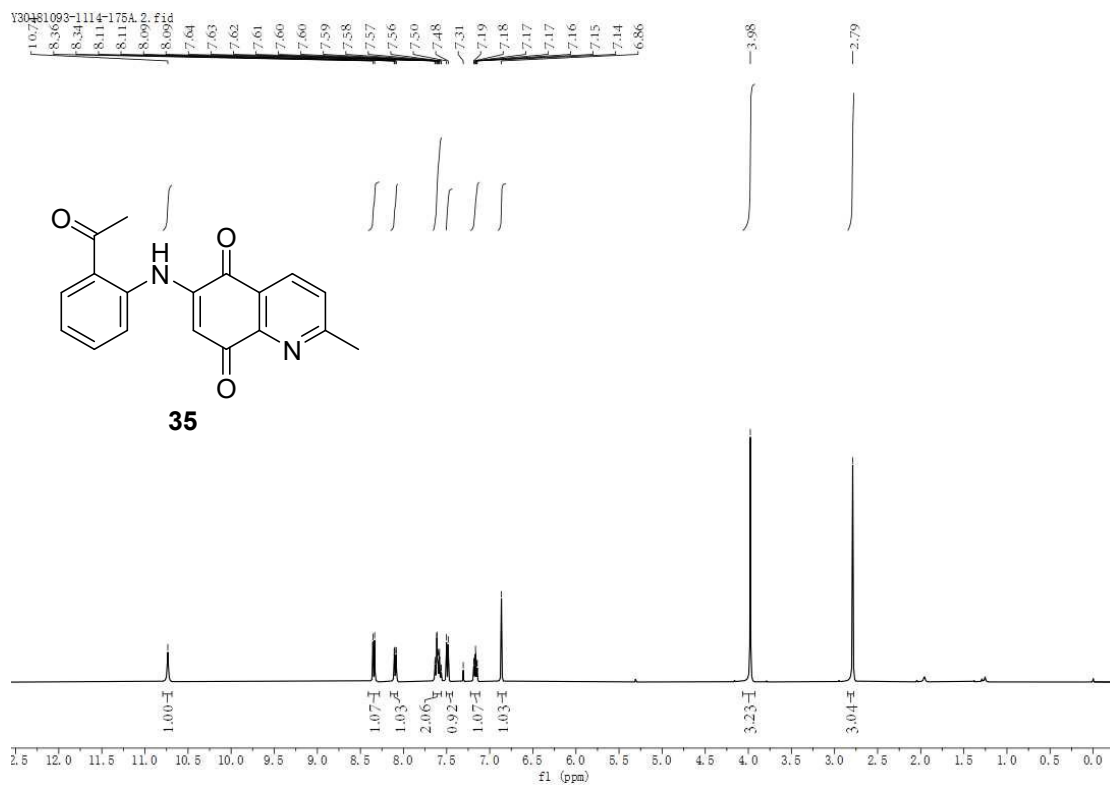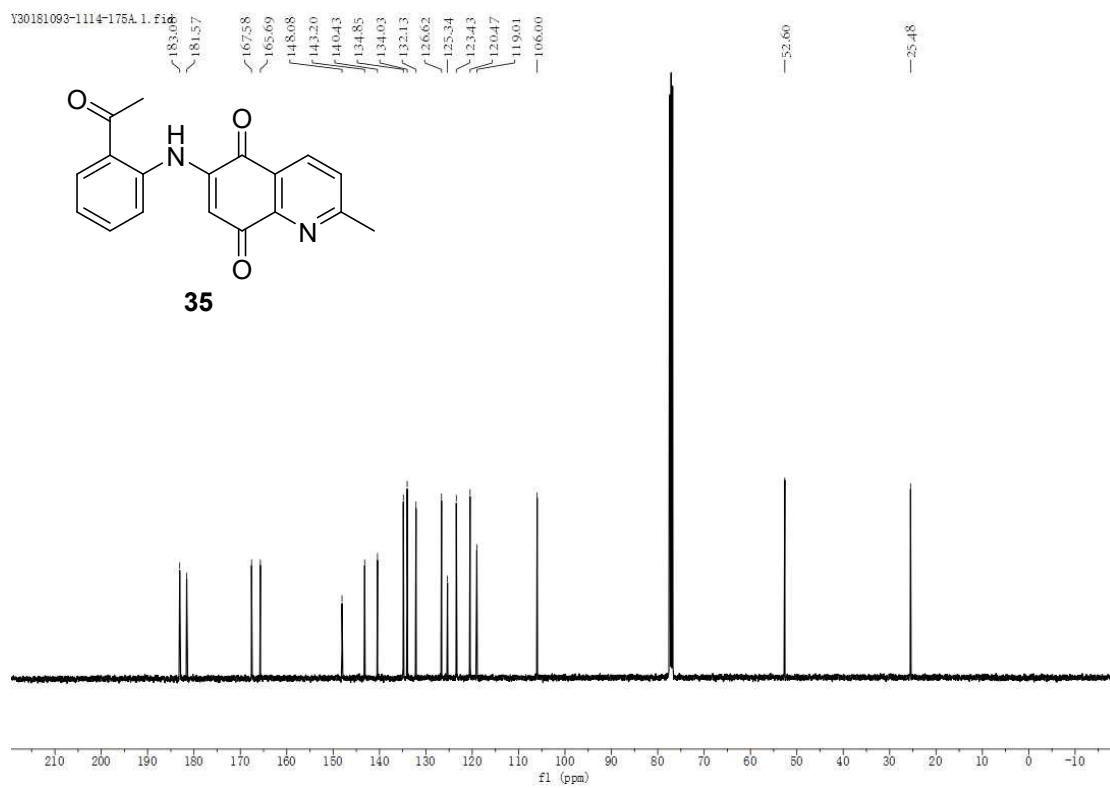

### 37: 3,4-dihydro-2H-[1,4]thiazino[2,3-g]quinoline-5,10-dione 1,1-dioxide

Y30181093-1125-180A.2.Fid

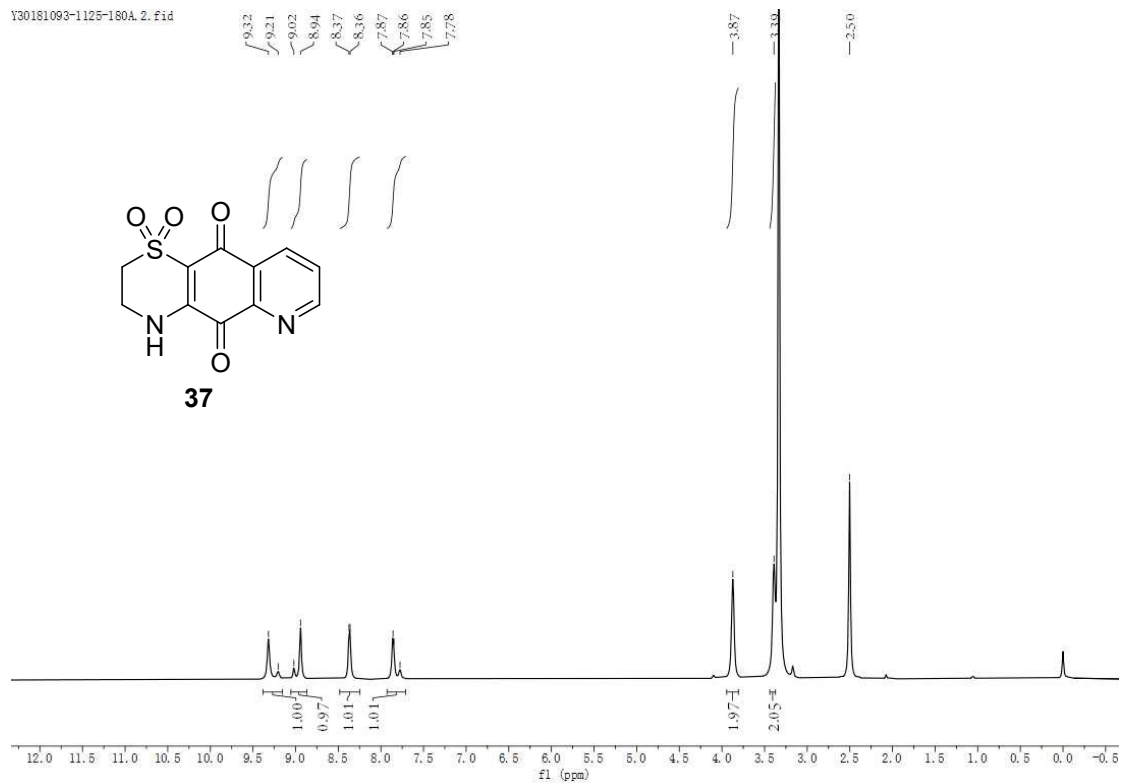

Y30181093-1125-180A.100001.615

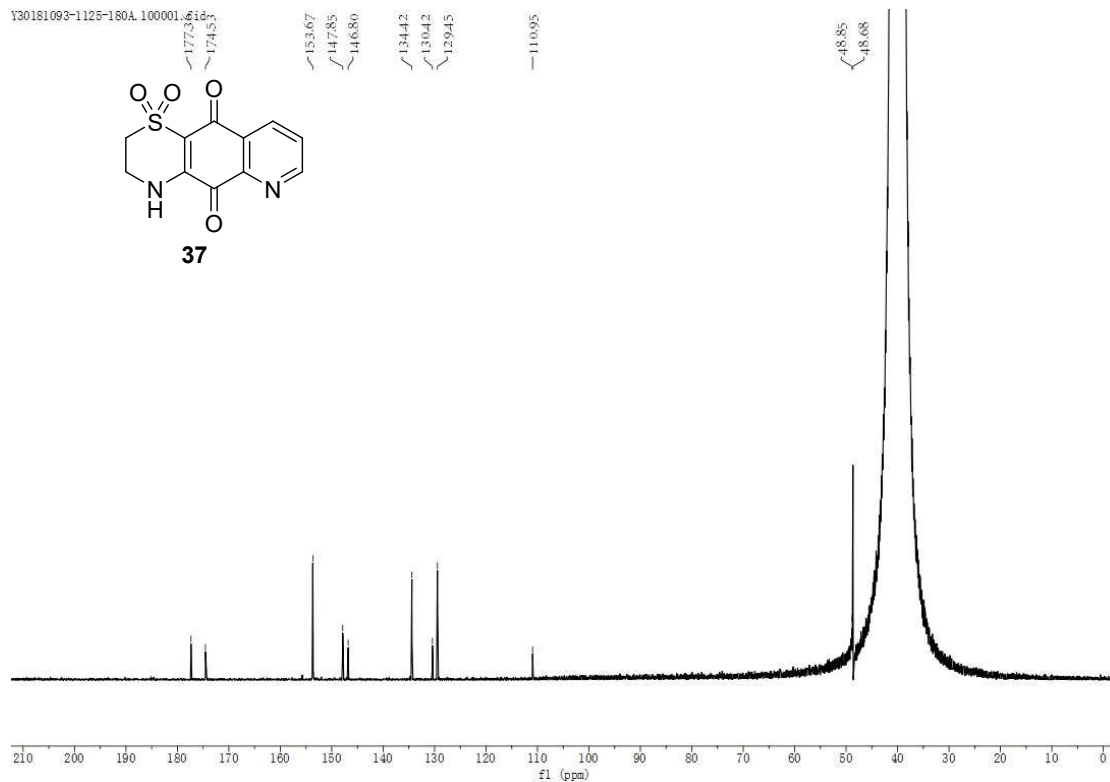

### 39: 5H-pyrido[3,2-a]phenoxazin-5-one

Y30181093-1128-179A.2.fid

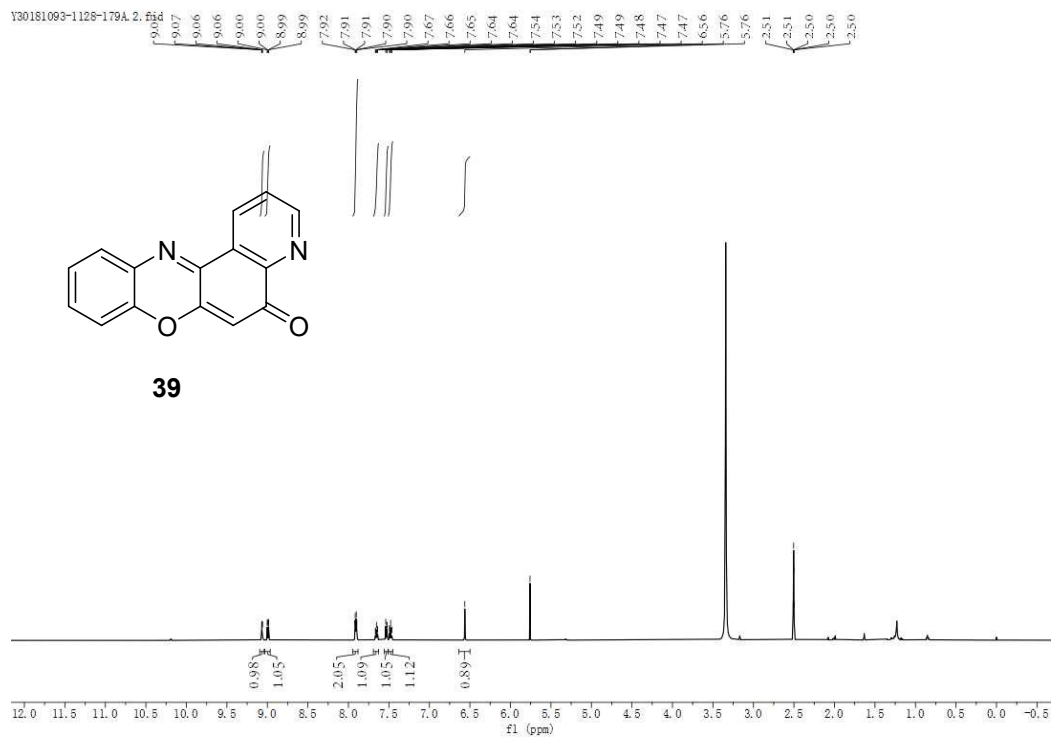

Y30181093-1128-179A.100001.fid

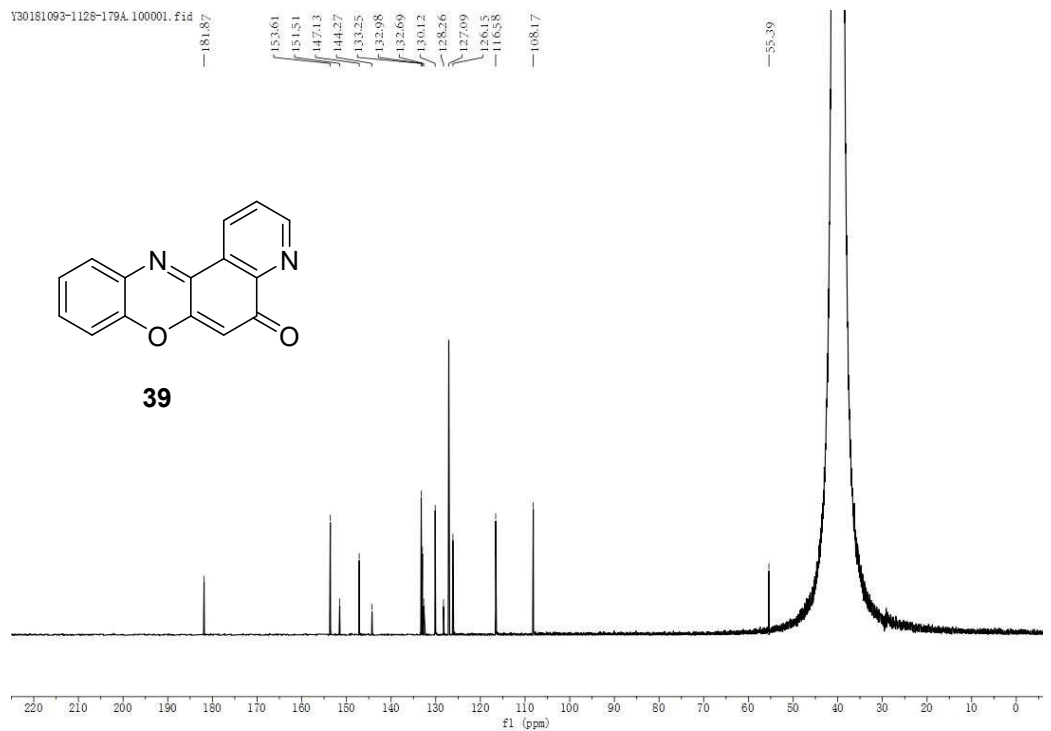

# 40: quinolin-5-ol

Y30181093-1116-178A.2.fid  
8.881, 8.882, 8.882, 8.882, 8.855, 8.54, 8.53, 8.52, 7.53, 7.51, 7.49, 7.43, 7.42, 7.41, 7.40, 7.38, 6.98, 6.96

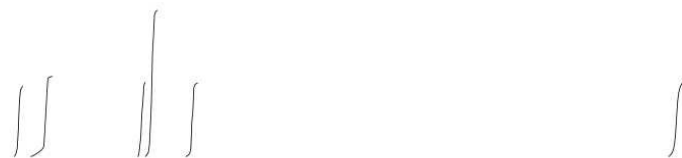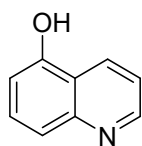

40

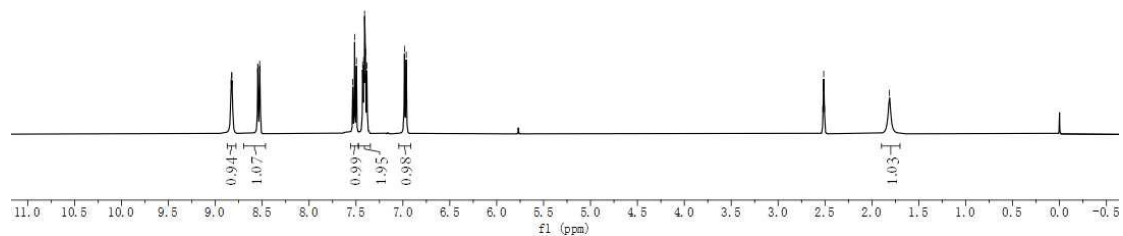

Y30181093-1116-178A.2.fid

155.24, 150.64, 149.55

131.30, 130.43, 120.58, 120.06, 118.63

108.95

40.60, 40.40, 40.19, 39.77, 39.56, 39.35

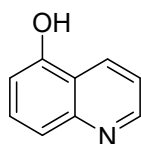

40

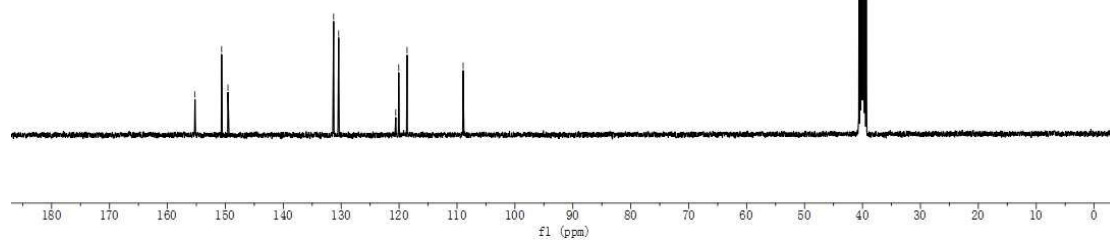



# 41: quinoline-5,8-diol

Y30181093-1107-171B.1.fid

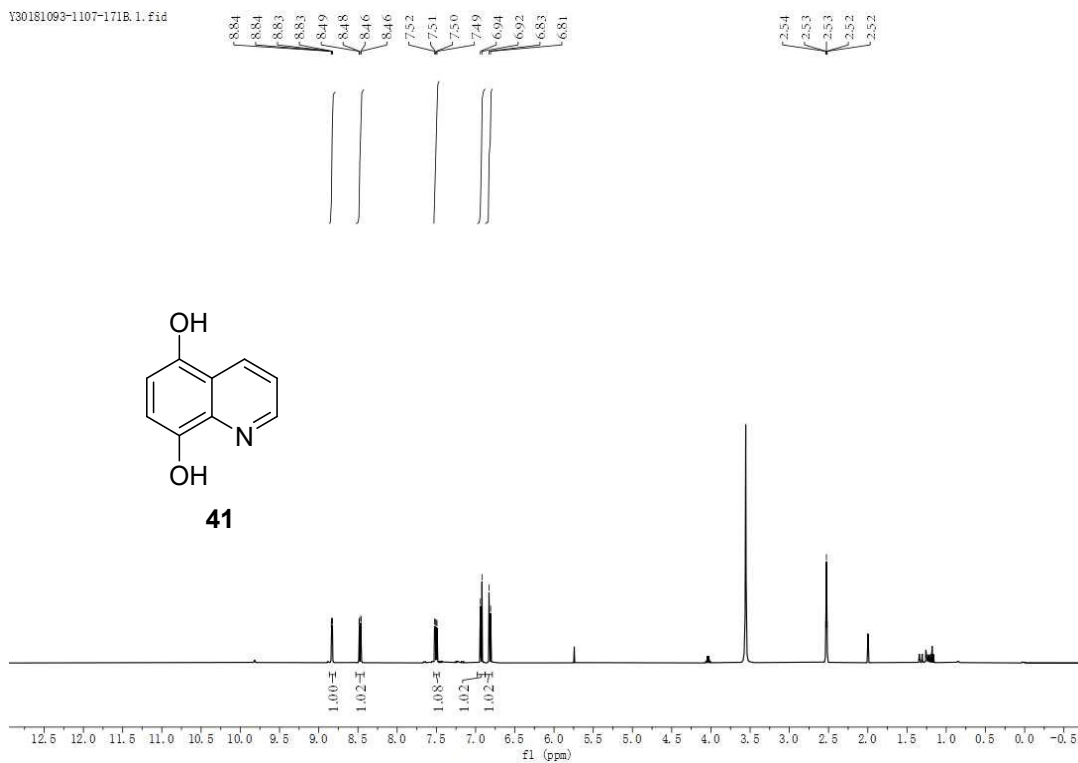

Y30181093-1107-171B.2.fid

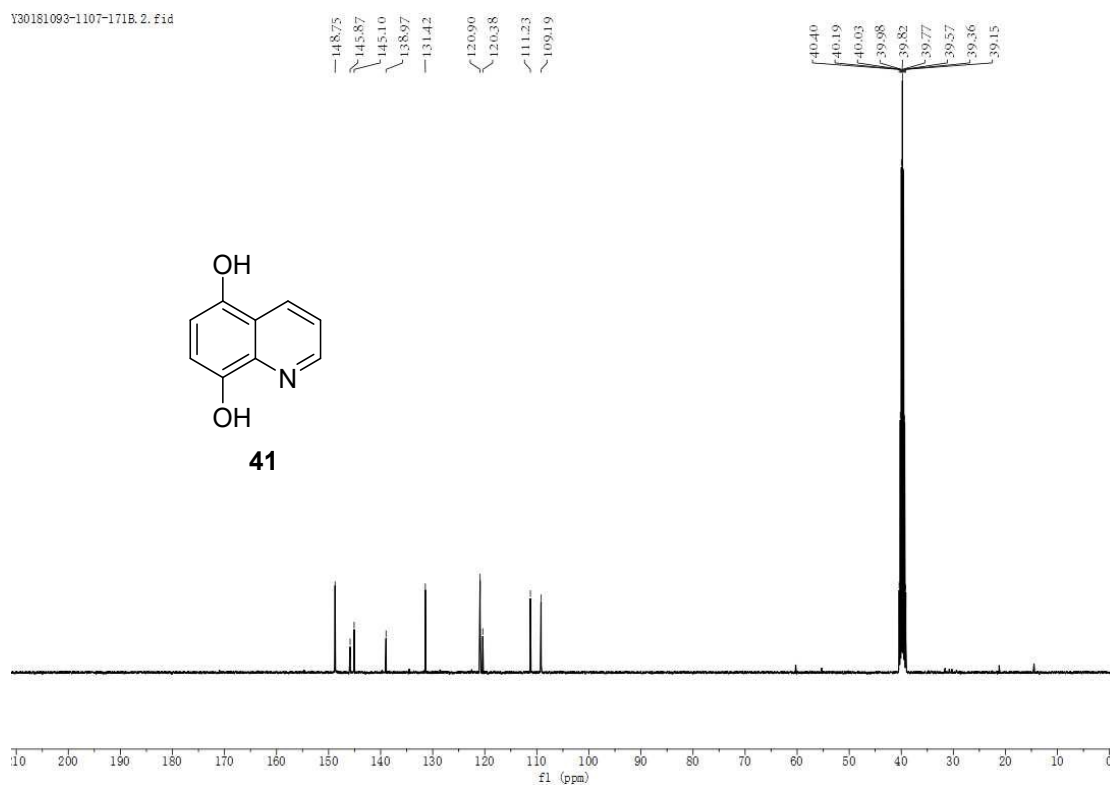

## G: References

1. E. Delfourne, F. Darro, P. Portefaix, C. Galaup, S. Bayssade, A. Bouteille, L. Le Corre, J. Bastide, F. Collignon, B. Lesur, A. Frydman, R. Kiss, *J. Med. Chem.*, 2002, **45**, 3765-3771.
2. A. N. Pearce, E. W. Chia, M. V. Berridge, G. R. Clark, J. L. Harper, L. Larsen, E. W. Maas, M. J. Page, N. B. Perry, V. L. Webb, B. R. Copp, *J. Nat. Prod.*, 2007, **70**, 936-940.
3. A. Bolognese, G. Correale, M. Manfra, A. Lavecchia, O. Mazzoni, E. Novellino, V. Barone, P. La Colla, R. Loddo, *J. Med. Chem.*, 2002, **45**, 5217-5223.
